# Supplementary material
Source: publisher figshare collection journal article supplement (https://acs.figshare.com/ndownloader/files/17851847)
Supplement: Supplementary file 1 [file 17851847]

## Sheet: Master list
SUPPLEMENTARY TABLE S1. Cell type-specific expression of testis elevated genes based ontranscriptomics and antibody-based proteomics. Detailed information on antibodies, protein evidence, protein expression data and GO terms for all 512 analyzed proteins.
ENSG ID	Gene name	UniProt Entry Ensembl 92	PE status (PE1-PE5) or PE1 with unknown function (uPE1) neXtProt 2019 release	Chromosome	Antibody ID	Multi Targeting Ab HPA18	Other gene matches HPA18	Has Enhanced validation HPA18	Enhanced validation type HPA18	Cluster from Heatmap	Scoring	Leydig cells intensity	Leydig cells quantity	Leydig cells loc	Leydig cells heatmap	Leydig cells cytoscape	elongated or late spermatids intensity	elongated or late spermatids quantity	elongated or late spermatids loc	Elongated or late spermatids heatmap	Elongated or late spermatids cytoscape	pachytene spermatocytes intensity	pachytene spermatocytes quantity	pachytene spermatocytes loc	Pachytene spermatocytes heatmap	Pachytene spermatocytes cytoscape	peritubular cells intensity	peritubular cells quantity	peritubular cells loc	Peritubular cells heatmap	Peritubular cells cytoscape	preleptotene spermatocytes intensity	preleptotene spermatocytes quantity	preleptotene spermatocytes loc	Preleptotene spermatocytes heatmap	Preleptotene spermatocytes cytoscape	round or early spermatids intensity	round or early spermatids quantity	round or early spermatids loc	Round or early spermatids heatmap	Round or early spermatids cytoscape	sertoli cells intensity	sertoli cells quantity	sertoli cells loc	Sertoli cells heatmap	Sertoli cells cytoscape	spermatogonia intensity	spermatogonia quantity	spermatogonia loc
ENSG00000006047	YBX2	Q9Y2T7	PE1	Chr17	HPA056744	no		yes	orthogonal	Meiotic and Postmeiotic grp 4	Elongated or late spermatids,Pachytene spermatocytes,Round or early spermatids	1	3	cytoplasmic	3	0	3	3	cytoplasmic	9	1	3	3	cytoplasmic	9	1	0	0	not set	0	0	1	3	cytoplasmic	3	0	3	3	cytoplasmic	9	1	0	0	not set	0	0	1	3	cytoplasmic
ENSG00000007038	PRSS21	Q9Y6M0	PE1	Chr16	HPA008477	no		yes	orthogonal	Meiotic and Postmeiotic grp 4	Elongated or late spermatids,Pachytene spermatocytes,Round or early spermatids	1	3	cytoplasmic	3	0	2	3	cytoplasmic,membrane	6	1	3	3	cytoplasmic,membrane	9	1	0	0	not set	0	0	1	3	cytoplasmic,membrane	3	0	3	3	cytoplasmic,membrane	9	1	0	0	not set	0	0	0	0	not set
ENSG00000007350	TKTL1	P51854	PE1	ChrX	HPA000505	no		yes	orthogonal		Elongated or late spermatids,Pachytene spermatocytes,Preleptotene spermatocytes,Round or early spermatids,Spermatogonia	1	1	cytoplasmic	1	0	3	2	cytoplasmic	6	1	2	3	cytoplasmic	6	1	1	0.5	cytoplasmic	0.5	0	3	3	cytoplasmic	9	1	2	3	cytoplasmic	6	1	0	0	not set	0	0	3	3	cytoplasmic
ENSG00000008300	CELSR3	Q9NYQ7	PE1	Chr3	HPA062866	no		no			Leydig cells,Pachytene spermatocytes,Preleptotene spermatocytes,Sertoli cells,Spermatogonia	2	2	cytoplasmic,membrane	4	1	1	2	cytoplasmic,membrane	2	0	2	2	cytoplasmic,membrane	4	1	1	2	cytoplasmic,membrane	2	0	2	2	cytoplasmic,membrane	4	1	1	2	cytoplasmic,membrane	2	0	2	3	cytoplasmic,membrane	6	1	2	2	cytoplasmic,membrane
ENSG00000010318	PHF7	Q9BWX1	PE1	Chr3	HPA070305	no		yes	orthogonal	Meiotic and Postmeiotic grp 4	Elongated or late spermatids,Pachytene spermatocytes,Round or early spermatids	1	3	cytoplasmic	3	0	3	2	cytoplasmic	6	1	2	2	cytoplasmic	4	1	0	0	not set	0	0	1	1	cytoplasmic	1	0	2	2	cytoplasmic	4	1	0	0	not set	0	0	1	1	cytoplasmic
ENSG00000010626	LRRC23	Q53EV4	uPE1	Chr12	HPA057533	no		yes	orthogonal	Meiotic and Postmeiotic grp 4	Elongated or late spermatids,Pachytene spermatocytes,Round or early spermatids	0	0	not set	0	0	3	3	cytoplasmic,membrane	9	1	3	3	cytoplasmic,membrane	9	1	0	0	not set	0	0	1	3	cytoplasmic,membrane	3	0	3	3	cytoplasmic,membrane	9	1	0	0	not set	0	0	1	3	cytoplasmic,membrane
ENSG00000013297	CLDN11	O75508	PE1	Chr3	HPA013166	no		yes	orthogonal	Somatic grp 6	Sertoli cells	1	1	cytoplasmic	1	0	0	0	not set	0	0	0	0	not set	0	0	0	0	not set	0	0	0	0	not set	0	0	0	0	not set	0	0	3	3	cytoplasmic,membrane	9	1	0	0	not set
ENSG00000024526	DEPDC1	Q5TB30	PE1	Chr1	CAB017845	no		no			Pachytene spermatocytes,Preleptotene spermatocytes,Round or early spermatids,Spermatogonia	2	1	cytoplasmic,nuclear	2	0	1	1	nuclear	1	0	3	3	nuclear	9	1	0	0	not set	0	0	3	3	nuclear	9	1	3	3	nuclear	9	1	0	0	not set	0	0	3	3	nuclear
ENSG00000028839	TBPL1	P62380	PE1	Chr6	HPA071813	no		yes	orthogonal		Pachytene spermatocytes,Preleptotene spermatocytes,Round or early spermatids,Spermatogonia	1	3	cytoplasmic,nuclear	3	0	1	2	cytoplasmic,membrane	2	0	3	3	nuclear	9	1	0	0	not set	0	0	3	3	nuclear	9	1	2	3	nuclear	6	1	0	0	not set	0	0	2	2	nuclear
ENSG00000034239	EFCAB1	Q9HAE3	uPE1	Chr8	HPA023527	no		yes	orthogonal	Postmeiotic grp 5	Elongated or late spermatids,Round or early spermatids	1	3	cytoplasmic	3	0	3	3	cytoplasmic,membrane	9	1	0	0	not set	0	0	0	0	not set	0	0	0	0	not set	0	0	3	3	cytoplasmic,membrane	9	1	0	0	not set	0	0	0	0	not set
ENSG00000035499	DEPDC1B	Q8WUY9	PE1	Chr5	HPA072558	no		no		Postmeiotic grp 5	Elongated or late spermatids,Round or early spermatids	1	2	cytoplasmic	2	0	3	3	cytoplasmic,membrane	9	1	0	0	not set	0	0	0	0	not set	0	0	0	0	not set	0	0	3	3	cytoplasmic,membrane	9	1	0	0	not set	0	0	0	0	not set
ENSG00000039600	SOX30	O94993	PE1	Chr5	HPA006159	no		yes	orthogonal	Postmeiotic grp 5	Round or early spermatids	2	1	cytoplasmic	2	0	1	0.5	cytoplasmic	0.5	0	1	3	cytoplasmic	3	0	0	0	not set	0	0	1	3	cytoplasmic	3	0	3	3	nuclear	9	1	0	0	not set	0	0	1	1	cytoplasmic
ENSG00000042813	ZPBP	Q9BS86	PE1	Chr7	HPA058673	no		yes	orthogonal	Postmeiotic grp 5	Elongated or late spermatids,Round or early spermatids	0	0	not set	0	0	3	3	nuclear	9	1	0	0	not set	0	0	0	0	not set	0	0	0	0	not set	0	0	3	3	nuclear	9	1	0	0	not set	0	0	0	0	not set
ENSG00000046774	MAGEC2	Q9UBF1	PE1	ChrX	HPA062230	no		yes	orthogonal	Premeiotic and meiotic grp2	Pachytene spermatocytes,Preleptotene spermatocytes,Spermatogonia	0	0	not set	0	0	0	0	not set	0	0	3	3	cytoplasmic	9	1	0	0	not set	0	0	3	3	cytoplasmic	9	1	1	2	cytoplasmic	2	0	0	0	not set	0	0	2	3	cytoplasmic
ENSG00000051180	RAD51	Q06609	PE1	Chr15	HPA039310	no		yes	orthogonal		Elongated or late spermatids,Pachytene spermatocytes,Preleptotene spermatocytes,Round or early spermatids	3	1	nuclear	3	0	2	3	cytoplasmic	6	1	3	3	nuclear	9	1	1	2	cytoplasmic,nuclear	2	0	3	3	nuclear	9	1	2	3	nuclear	6	1	3	1	nuclear	3	0	1	3	nuclear
ENSG00000056277	ZNF280C	Q8ND82	PE1	ChrX	HPA055788	no		no			Leydig cells,Pachytene spermatocytes,Peritubular cells,Preleptotene spermatocytes,Spermatogonia	2	2	nuclear	4	1	0	0	not set	0	0	2	3	nuclear	6	1	2	2	nuclear	4	1	3	3	nuclear	9	1	1	1	nuclear	1	0	0	0	not set	0	0	2	3	nuclear
ENSG00000064199	SPA17	Q15506	PE1	Chr11	HPA037568	no		yes	orthogonal	Meiotic and Postmeiotic grp 4	Elongated or late spermatids,Pachytene spermatocytes,Round or early spermatids	0	0	not set	0	0	3	3	cytoplasmic,membrane	9	1	3	3	cytoplasmic,membrane	9	1	0	0	not set	0	0	1	1	cytoplasmic	1	0	3	3	cytoplasmic,membrane	9	1	0	0	not set	0	0	1	2	cytoplasmic
ENSG00000068615	REEP1	Q9H902	PE1	Chr2	HPA058061	no		yes	orthogonal		Elongated or late spermatids,Pachytene spermatocytes,Preleptotene spermatocytes,Round or early spermatids,Sertoli cells,Spermatogonia	0	0	not set	0	0	2	3	cytoplasmic,membrane	6	1	2	3	cytoplasmic,membrane	6	1	0	0	not set	0	0	2	3	cytoplasmic,membrane	6	1	2	3	cytoplasmic,membrane	6	1	3	3	cytoplasmic	9	1	2	3	cytoplasmic,membrane
ENSG00000068985	PAGE1	O75459	uPE1	ChrX	HPA003473	no		yes	orthogonal		Pachytene spermatocytes,Preleptotene spermatocytes,Round or early spermatids,Spermatogonia	0	0	not set	0	0	1	2	cytoplasmic	2	0	2	3	cytoplasmic	6	1	0	0	not set	0	0	3	3	cytoplasmic	9	1	2	3	cytoplasmic	6	1	0	0	not set	0	0	3	2	cytoplasmic
ENSG00000071539	TRIP13	Q15645	PE1	Chr5	HPA053093	no		yes	orthogonal	Meiotic and Postmeiotic grp 4	Elongated or late spermatids,Pachytene spermatocytes,Round or early spermatids	1	2	cytoplasmic	2	0	3	3	cytoplasmic,membrane	9	1	2	3	cytoplasmic,membrane	6	1	0	0	not set	0	0	1	3	cytoplasmic,membrane	3	0	2	3	cytoplasmic,membrane	6	1	0	0	not set	0	0	1	3	cytoplasmic,membrane
ENSG00000072571	HMMR	O75330	PE1	Chr5	CAB002433	no		yes	orthogonal	Meiotic grp 3	Pachytene spermatocytes	1	2	cytoplasmic	2	0	0	0	not set	0	0	3	3	cytoplasmic,membrane	9	1	0	0	not set	0	0	0	0	not set	0	0	1	1	cytoplasmic,membrane	1	0	0	0	not set	0	0	0	0	not set
ENSG00000073598	FNDC8	Q8TC99	uPE1	Chr17	HPA026521	no		no		Postmeiotic grp 5	Elongated or late spermatids,Round or early spermatids	1	3	cytoplasmic	3	0	3	3	cytoplasmic	9	1	1	3	cytoplasmic	3	0	0	0	not set	0	0	1	3	cytoplasmic	3	0	2	3	cytoplasmic	6	1	1	3	cytoplasmic	3	0	1	2	cytoplasmic
ENSG00000075131	TIPIN	Q9BVW5	PE1	Chr15	HPA058799	no		yes	orthogonal	Premeiotic grp 1	Preleptotene spermatocytes,Spermatogonia	0	0	not set	0	0	0	0	not set	0	0	0	0	not set	0	0	0	0	not set	0	0	3	3	nuclear	9	1	0	0	not set	0	0	0	0	not set	0	0	2	2	nuclear
ENSG00000075702	WDR62	O43379	PE1	Chr19	HPA043255	no		yes	orthogonal	Meiotic and Postmeiotic grp 4	Elongated or late spermatids,Pachytene spermatocytes,Round or early spermatids	1	3	cytoplasmic,membrane	3	0	3	3	cytoplasmic,membrane	9	1	3	3	cytoplasmic,membrane	9	1	0	0	not set	0	0	1	3	cytoplasmic,membrane	3	0	3	3	cytoplasmic,membrane	9	1	0	0	not set	0	0	1	3	cytoplasmic,membrane
ENSG00000077327	SPAG6	O75602	PE1	Chr10	HPA038440	no		yes	orthogonal		Leydig cells,Elongated or late spermatids,Pachytene spermatocytes,Round or early spermatids	2	3	cytoplasmic	6	1	2	3	cytoplasmic	6	1	2	3	cytoplasmic,nuclear	6	1	0	0	not set	0	0	0	0	not set	0	0	2	3	cytoplasmic,nuclear	6	1	0	0	not set	0	0	0	0	not set
ENSG00000077616	NAALAD2	Q9Y3Q0	PE1	Chr11	HPA065419	no		no			Elongated or late spermatids,Pachytene spermatocytes	0	0	not set	0	0	2	3	cytoplasmic,membrane	6	1	2	3	cytoplasmic,membrane	6	1	0	0	not set	0	0	0	0	not set	0	0	1	3	cytoplasmic,membrane	3	0	0	0	not set	0	0	0	0	not set
ENSG00000077800	FKBP6	O75344	PE1	Chr7	HPA061109	no		yes	orthogonal	Premeiotic grp 1	Preleptotene spermatocytes,Spermatogonia	1	1	cytoplasmic	1	0	1	3	cytoplasmic	3	0	1	3	cytoplasmic	3	0	0	0	not set	0	0	2	2	cytoplasmic	4	1	1	3	cytoplasmic	3	0	0	0	not set	0	0	3	3	cytoplasmic
ENSG00000077935	SMC1B	Q8NDV3	PE1	Chr22	HPA001500	no		yes	orthogonal		Pachytene spermatocytes,Preleptotene spermatocytes,Round or early spermatids,Spermatogonia	1	3	cytoplasmic	3	0	1	2	cytoplasmic	2	0	3	3	cytoplasmic	9	1	0	0	not set	0	0	3	2	cytoplasmic	6	1	2	3	cytoplasmic	6	1	0	0	not set	0	0	3	3	cytoplasmic
ENSG00000078043	PIAS2	O75928	PE1	Chr18	HPA068792	no		yes	orthogonal		Pachytene spermatocytes,Preleptotene spermatocytes,Round or early spermatids,Spermatogonia	1	2	nuclear	2	0	0	0	not set	0	0	2	3	nuclear	6	1	0	0	not set	0	0	3	2	nuclear	6	1	2	3	nuclear	6	1	0	0	not set	0	0	3	3	nuclear
ENSG00000080298	RFX3	P48380	PE1	Chr9	HPA035689	no		yes	orthogonal	Meiotic and Postmeiotic grp 4	Elongated or late spermatids,Pachytene spermatocytes,Round or early spermatids	0	0	not set	0	0	2	2	cytoplasmic,membrane	4	1	3	3	nuclear	9	1	0	0	not set	0	0	0	0	not set	0	0	3	3	nuclear	9	1	0	0	not set	0	0	0	0	not set
ENSG00000080572	PIH1D3	Q9NQM4	PE1	ChrX	HPA072496	no		yes	orthogonal	Postmeiotic grp 5	Round or early spermatids	0	0	not set	0	0	0	0	not set	0	0	0	0	not set	0	0	0	0	not set	0	0	0	0	not set	0	0	3	3	nuclear	9	1	0	0	not set	0	0	0	0	not set
ENSG00000085999	RAD54L	Q92698	PE1	Chr1	HPA028954	no		no		Premeiotic grp 1	Preleptotene spermatocytes,Spermatogonia	1	3	cytoplasmic,membrane,nuclear	3	0	1	3	cytoplasmic,membrane	3	0	1	3	cytoplasmic,membrane,nuclear	3	0	1	3	cytoplasmic,membrane,nuclear	3	0	3	3	cytoplasmic,membrane,nuclear	9	1	1	3	cytoplasmic,membrane	3	0	1	3	cytoplasmic,membrane,nuclear	3	0	3	3	cytoplasmic,membrane,nuclear
ENSG00000086288	NME8	Q8N427	PE1	Chr7	CAB016416	no		no			Leydig cells,Elongated or late spermatids,Round or early spermatids,Spermatogonia	2	3	cytoplasmic	6	1	3	3	cytoplasmic,membrane,nuclear	9	1	1	3	cytoplasmic,membrane,nuclear	3	0	0	0	not set	0	0	1	3	cytoplasmic,membrane,nuclear	3	0	3	3	cytoplasmic,membrane,nuclear	9	1	1	3	cytoplasmic,membrane,nuclear	3	0	2	2	cytoplasmic,membrane,nuclear
ENSG00000087586	AURKA	O14965	PE1	Chr20	CAB001454	no		no		Meiotic grp 3	Pachytene spermatocytes	1	1	cytoplasmic	1	0	0	0	not set	0	0	2	3	cytoplasmic,membrane	6	1	0	0	not set	0	0	1	1	cytoplasmic,membrane	1	0	0	0	not set	0	0	0	0	not set	0	0	2	1	cytoplasmic,membrane
ENSG00000087903	RFX2	P48378	PE1	Chr19	HPA048969	no		yes	orthogonal	Meiotic and Postmeiotic grp 4	Pachytene spermatocytes,Round or early spermatids	0	0	not set	0	0	0	0	not set	0	0	3	3	nuclear	9	1	0	0	not set	0	0	0	0	not set	0	0	3	3	nuclear	9	1	0	0	not set	0	0	0	0	not set
ENSG00000088756	ARHGAP28	Q9P2N2	PE1	Chr18	HPA030413	no		yes	orthogonal	Postmeiotic grp 5	Elongated or late spermatids,Round or early spermatids	1	3	cytoplasmic	3	0	3	3	cytoplasmic,membrane,nuclear	9	1	0	0	not set	0	0	0	0	not set	0	0	0	0	not set	0	0	3	3	cytoplasmic,membrane,nuclear	9	1	0	0	not set	0	0	0	0	not set
ENSG00000089685	BIRC5	O15392	PE1	Chr17	CAB004270	no		yes	orthogonal		Pachytene spermatocytes,Preleptotene spermatocytes,Round or early spermatids	2	1	cytoplasmic	2	0	0	0	not set	0	0	3	3	nuclear	9	1	0	0	not set	0	0	3	2	nuclear	6	1	3	3	nuclear	9	1	0	0	not set	0	0	1	1	nuclear
ENSG00000089723	OTUB2	Q96DC9	PE1	Chr14	HPA002329	no		yes	orthogonal		Elongated or late spermatids,Pachytene spermatocytes,Preleptotene spermatocytes,Round or early spermatids	1	2	cytoplasmic,nuclear	2	0	3	3	cytoplasmic,membrane	9	1	3	3	nuclear	9	1	1	0.5	cytoplasmic,membrane,nuclear	0.5	0	2	3	nuclear	6	1	3	3	nuclear	9	1	1	1	nuclear	1	0	1	3	nuclear
ENSG00000091651	ORC6	Q9Y5N6	PE1	Chr16	CAB016330	no		yes	orthogonal	Premeiotic and meiotic grp2	Pachytene spermatocytes,Preleptotene spermatocytes,Spermatogonia	1	3	cytoplasmic	3	0	0	0	not set	0	0	3	3	nuclear	9	1	0	0	not set	0	0	3	3	nuclear	9	1	0	0	not set	0	0	0	0	not set	0	0	2	3	nuclear
ENSG00000092345	DAZL	Q92904	PE1	Chr3	HPA047113	yes	ENSG00000187191,ENSG00000188120,ENSG00000205916,ENSG00000205944	no		Premeiotic and meiotic grp2	Pachytene spermatocytes,Preleptotene spermatocytes,Spermatogonia	0	0	not set	0	0	0	0	not set	0	0	2	3	cytoplasmic,membrane	6	1	0	0	not set	0	0	3	3	cytoplasmic,membrane	9	1	1	1	cytoplasmic,membrane	1	0	0	0	not set	0	0	3	3	cytoplasmic,membrane
ENSG00000093009	CDC45	O75419	PE1	Chr22	HPA000614	no		yes	orthogonal	Meiotic and Postmeiotic grp 4	Pachytene spermatocytes,Round or early spermatids	1	3	cytoplasmic,nuclear	3	0	1	2	cytoplasmic	2	0	3	3	cytoplasmic,nuclear	9	1	1	2	cytoplasmic	2	0	1	3	cytoplasmic	3	0	2	2	cytoplasmic,nuclear	4	1	1	3	cytoplasmic,membrane	3	0	1	2	cytoplasmic,nuclear
ENSG00000097046	CDC7	O00311	PE1	Chr1	CAB002669	no		yes	orthogonal		Pachytene spermatocytes,Preleptotene spermatocytes,Round or early spermatids	1	2	cytoplasmic	2	0	1	1	nuclear	1	0	3	3	nuclear	9	1	0	0	not set	0	0	2	3	nuclear	6	1	2	3	nuclear	6	1	0	0	not set	0	0	1	3	nuclear
ENSG00000099840	IZUMO4	Q1ZYL8	PE1	Chr19	HPA048496	no		yes	orthogonal		Elongated or late spermatids,Pachytene spermatocytes,Round or early spermatids,Spermatogonia	1	3	cytoplasmic	3	0	3	3	cytoplasmic,nuclear	9	1	2	3	membrane	6	1	0	0	not set	0	0	1	3	cytoplasmic,membrane	3	0	3	3	cytoplasmic,membrane,nuclear	9	1	0	0	not set	0	0	2	3	cytoplasmic,membrane
ENSG00000099960	SLC7A4	O43246	PE1	Chr22	HPA031023	no		yes	orthogonal		Elongated or late spermatids,Sertoli cells	1	3	cytoplasmic	3	0	3	3	cytoplasmic,membrane	9	1	0	0	not set	0	0	0	0	not set	0	0	0	0	not set	0	0	0	0	not set	0	0	2	2	membrane	4	1	0	0	not set
ENSG00000100206	DMC1	Q14565	PE1	Chr22	HPA001232	no		yes	orthogonal	Meiotic grp 3	Pachytene spermatocytes	0	0	not set	0	0	0	0	not set	0	0	3	3	nuclear	9	1	0	0	not set	0	0	0	0	not set	0	0	0	0	not set	0	0	0	0	not set	0	0	0	0	not set
ENSG00000100312	ACR	P10323	PE1	Chr22	HPA048687	no		yes	orthogonal	Meiotic and Postmeiotic grp 4	Elongated or late spermatids,Pachytene spermatocytes,Round or early spermatids	1	3	cytoplasmic	3	0	3	3	cytoplasmic,nuclear	9	1	2	2	cytoplasmic	4	1	0	0	not set	0	0	0	0	not set	0	0	3	3	cytoplasmic,nuclear	9	1	0	0	not set	0	0	0	0	not set
ENSG00000100523	DDHD1	Q8NEL9	PE1	Chr14	HPA049870	no		yes	orthogonal		Elongated or late spermatids,Preleptotene spermatocytes,Round or early spermatids,Spermatogonia	2	1	cytoplasmic	2	0	3	3	cytoplasmic,membrane	9	1	1	3	cytoplasmic,membrane	3	0	0	0	not set	0	0	3	3	cytoplasmic,membrane	9	1	3	2	cytoplasmic,membrane	6	1	0	0	not set	0	0	3	3	cytoplasmic,membrane
ENSG00000101115	SALL4	Q9UJQ4	PE1	Chr20	HPA015291	no		yes	independent	Premeiotic grp 1	Spermatogonia	0	0	not set	0	0	0	0	not set	0	0	0	0	not set	0	0	0	0	not set	0	0	1	2	nuclear	2	0	0	0	not set	0	0	0	0	not set	0	0	3	3	nuclear
ENSG00000101189	MRGBP	Q9NV56	PE1	Chr20	HPA017012	no		yes	orthogonal	Meiotic and Postmeiotic grp 4	Pachytene spermatocytes,Round or early spermatids	0	0	not set	0	0	0	0	not set	0	0	3	3	nuclear	9	1	0	0	not set	0	0	0	0	not set	0	0	3	3	nuclear	9	1	0	0	not set	0	0	0	0	not set
ENSG00000101222	SPEF1	Q9Y4P9	PE1	Chr20	HPA050786	no		yes	orthogonal	Somatic grp 6	Sertoli cells	0	0	not set	0	0	0	0	not set	0	0	0	0	not set	0	0	0	0	not set	0	0	0	0	not set	0	0	0	0	not set	0	0	3	3	cytoplasmic,membrane	9	1	0	0	not set
ENSG00000101251	SEL1L2	Q5TEA6	uPE1	Chr20	HPA059121	no		no		Meiotic grp 3	Pachytene spermatocytes	0	0	not set	0	0	0	0	not set	0	0	2	3	nuclear	6	1	0	0	not set	0	0	0	0	not set	0	0	1	3	nuclear	3	0	0	0	not set	0	0	0	0	not set
ENSG00000101276	SLC52A3	Q9NQ40	PE1	Chr20	HPA049391	no		no			Elongated or late spermatids,Pachytene spermatocytes,Preleptotene spermatocytes,Round or early spermatids,Sertoli cells	1	3	cytoplasmic	3	0	3	3	cytoplasmic,membrane	9	1	3	2	cytoplasmic,membrane	6	1	0	0	not set	0	0	2	2	cytoplasmic,membrane	4	1	3	3	cytoplasmic,membrane	9	1	3	3	cytoplasmic,membrane	9	1	2	1	cytoplasmic,membrane
ENSG00000101842	VSIG1	Q86XK7	PE1	ChrX	HPA036310	no		yes	orthogonal		Elongated or late spermatids,Pachytene spermatocytes,Preleptotene spermatocytes,Round or early spermatids,Spermatogonia	0	0	not set	0	0	3	3	cytoplasmic,membrane	9	1	3	3	cytoplasmic,membrane	9	1	0	0	not set	0	0	3	3	cytoplasmic,membrane	9	1	3	3	cytoplasmic,membrane	9	1	0	0	not set	0	0	3	3	cytoplasmic,membrane
ENSG00000102021	LUZP4	Q9P127	PE1	ChrX	HPA046436	no		yes	independent,orthogonal	Premeiotic grp 1	Preleptotene spermatocytes,Spermatogonia	1	3	cytoplasmic	3	0	1	3	cytoplasmic	3	0	1	3	cytoplasmic	3	0	0	0	not set	0	0	3	2	cytoplasmic	6	1	1	3	cytoplasmic	3	0	0	0	not set	0	0	2	3	cytoplasmic
ENSG00000102048	ASB9	Q96DX5	PE1	ChrX	HPA003060	no		yes	independent,orthogonal	Premeiotic grp 1	Preleptotene spermatocytes,Spermatogonia	1	2	cytoplasmic,membrane	2	0	1	3	cytoplasmic,membrane	3	0	1	2	cytoplasmic,membrane,nuclear	2	0	0	0	not set	0	0	3	2	nuclear	6	1	1	2	cytoplasmic,membrane	2	0	0	0	not set	0	0	3	2	nuclear
ENSG00000102098	SCML2	Q9UQR0	PE1	ChrX	HPA064713	no		yes	orthogonal	Premeiotic and meiotic grp2	Pachytene spermatocytes,Preleptotene spermatocytes,Spermatogonia	1	2	cytoplasmic,nuclear	2	0	1	1	nuclear	1	0	2	3	nuclear	6	1	0	0	not set	0	0	3	3	nuclear	9	1	1	2	nuclear	2	0	0	0	not set	0	0	3	2	nuclear
ENSG00000102981	PARD6A	Q9NPB6	PE1	Chr16	HPA041551	no		no		Premeiotic and meiotic grp2	Pachytene spermatocytes,Spermatogonia	1	3	cytoplasmic	3	0	1	3	cytoplasmic,membrane	3	0	3	3	cytoplasmic,membrane	9	1	0	0	not set	0	0	2	1	cytoplasmic,membrane	2	0	1	3	cytoplasmic,membrane	3	0	0	0	not set	0	0	2	3	cytoplasmic,membrane
ENSG00000102984	ZNF821	O75541	PE1	Chr16	HPA036372	no		yes	orthogonal	Somatic grp 6	Leydig cells,Sertoli cells	3	3	cytoplasmic,membrane	9	1	0	0	not set	0	0	0	0	not set	0	0	2	1	cytoplasmic,membrane	2	0	0	0	not set	0	0	0	0	not set	0	0	3	3	cytoplasmic,membrane	9	1	0	0	not set
ENSG00000103995	CEP152	O94986	PE1	Chr15	HPA039408	no		no		Meiotic and Postmeiotic grp 4	Elongated or late spermatids,Pachytene spermatocytes,Round or early spermatids	1	3	cytoplasmic	3	0	3	3	cytoplasmic,membrane	9	1	3	3	cytoplasmic,membrane	9	1	0	0	not set	0	0	1	3	cytoplasmic,membrane	3	0	3	3	cytoplasmic,membrane	9	1	0	0	not set	0	0	1	3	cytoplasmic,membrane
ENSG00000104177	MYEF2		PE1	Chr15	HPA004883	no		no			Leydig cells,Pachytene spermatocytes,Preleptotene spermatocytes,Round or early spermatids,Sertoli cells,Spermatogonia	2	3	nuclear	6	1	0	0	not set	0	0	3	3	nuclear	9	1	1	1	nuclear	1	0	3	3	nuclear	9	1	3	3	nuclear	9	1	3	3	nuclear	9	1	3	3	nuclear
ENSG00000104450	SPAG1	Q07617	PE1	Chr8	HPA053682	no		yes	orthogonal	Meiotic and Postmeiotic grp 4	Pachytene spermatocytes,Round or early spermatids	0	0	not set	0	0	0	0	not set	0	0	3	3	cytoplasmic,membrane	9	1	0	0	not set	0	0	0	0	not set	0	0	3	3	cytoplasmic,membrane	9	1	0	0	not set	0	0	0	0	not set
ENSG00000104755	ADAM2	Q99965	PE1	Chr8	HPA026581	no		yes	orthogonal	Meiotic and Postmeiotic grp 4	Elongated or late spermatids,Pachytene spermatocytes,Round or early spermatids	1	3	cytoplasmic	3	0	2	2	cytoplasmic	4	1	2	3	membrane	6	1	0	0	not set	0	0	1	2	membrane	2	0	3	3	membrane	9	1	0	0	not set	0	0	0	0	not set
ENSG00000104901	DKKL1	Q9UK85	PE1	Chr19	HPA047194	no		yes	orthogonal	Postmeiotic grp 5	Elongated or late spermatids,Round or early spermatids	1	1	cytoplasmic	1	0	3	2	cytoplasmic	6	1	1	0.5	cytoplasmic	0.5	0	0	0	not set	0	0	1	0.5	cytoplasmic	0.5	0	3	3	cytoplasmic	9	1	0	0	not set	0	0	0	0	not set
ENSG00000104951	IL4I1	Q96RQ9	PE1	Chr19	HPA045598	no		yes	orthogonal	Postmeiotic grp 5	Elongated or late spermatids,Round or early spermatids	1	2	cytoplasmic,membrane	2	0	3	3	cytoplasmic,membrane	9	1	1	2	cytoplasmic	2	0	0	0	not set	0	0	0	0	not set	0	0	3	3	cytoplasmic,membrane	9	1	0	0	not set	0	0	0	0	not set
ENSG00000105143	SLC1A6	P48664	PE1	Chr19	HPA044066	no		no			Leydig cells,Elongated or late spermatids,Pachytene spermatocytes,Sertoli cells	2	3	cytoplasmic,membrane,nuclear	6	1	3	2	cytoplasmic,membrane,nuclear	6	1	2	3	cytoplasmic,membrane	6	1	1	3	cytoplasmic,membrane,nuclear	3	0	1	3	cytoplasmic,membrane	3	0	1	2	cytoplasmic,membrane	2	0	3	3	cytoplasmic,membrane,nuclear	9	1	1	2	cytoplasmic,membrane
ENSG00000105255	FSD1	Q9BTV5	PE1	Chr19	HPA043141	no		no			Elongated or late spermatids,Preleptotene spermatocytes,Spermatogonia	1	3	cytoplasmic	3	0	2	3	cytoplasmic,membrane	6	1	1	3	cytoplasmic,membrane	3	0	0	0	not set	0	0	3	3	cytoplasmic,membrane	9	1	1	3	cytoplasmic,membrane	3	0	0	0	not set	0	0	3	3	cytoplasmic,membrane
ENSG00000105479	CCDC114	Q96M63	PE1	Chr19	HPA042524	no		no		Meiotic and Postmeiotic grp 4	Elongated or late spermatids,Pachytene spermatocytes,Round or early spermatids	1	1	cytoplasmic	1	0	2	3	cytoplasmic,membrane	6	1	2	2	cytoplasmic,membrane	4	1	0	0	not set	0	0	1	1	cytoplasmic,membrane	1	0	2	3	cytoplasmic,membrane	6	1	0	0	not set	0	0	0	0	not set
ENSG00000105655	ISYNA1	Q9NPH2	PE1	Chr19	HPA008232	no		yes	independent,orthogonal		Elongated or late spermatids,Pachytene spermatocytes,Preleptotene spermatocytes,Round or early spermatids,Sertoli cells,Spermatogonia	0	0	not set	0	0	3	3	cytoplasmic,membrane	9	1	3	3	cytoplasmic,membrane	9	1	0	0	not set	0	0	3	3	cytoplasmic,membrane	9	1	3	3	cytoplasmic,membrane	9	1	3	3	cytoplasmic,membrane	9	1	3	3	cytoplasmic,membrane
ENSG00000105679	GAPDHS	O14556	PE1	Chr19	HPA042666	no		yes	orthogonal	Postmeiotic grp 5	Elongated or late spermatids	0	0	not set	0	0	3	3	cytoplasmic,membrane	9	1	0	0	not set	0	0	0	0	not set	0	0	0	0	not set	0	0	0	0	not set	0	0	0	0	not set	0	0	0	0	not set
ENSG00000105717	PBX4	Q9BYU1	PE1	Chr19	HPA049859	no		yes	orthogonal		Elongated or late spermatids,Sertoli cells	1	1	cytoplasmic	1	0	3	2	cytoplasmic	6	1	0	0	not set	0	0	0	0	not set	0	0	0	0	not set	0	0	0	0	not set	0	0	3	2	cytoplasmic,membrane	6	1	0	0	not set
ENSG00000105926	MPP6	Q9NZW5	PE1	Chr7	HPA019085	no		yes	independent,orthogonal		Elongated or late spermatids,Pachytene spermatocytes,Preleptotene spermatocytes,Round or early spermatids,Spermatogonia	1	3	cytoplasmic	3	0	3	3	cytoplasmic,membrane	9	1	3	3	cytoplasmic,membrane	9	1	0	0	not set	0	0	3	3	cytoplasmic,membrane	9	1	3	3	cytoplasmic,membrane	9	1	0	0	not set	0	0	3	3	cytoplasmic,membrane
ENSG00000106304	SPAM1	P38567	PE1	Chr7	HPA017984	no		yes	orthogonal		Elongated or late spermatids,Pachytene spermatocytes,Preleptotene spermatocytes,Round or early spermatids,Spermatogonia	0	0	not set	0	0	3	3	cytoplasmic	9	1	3	3	cytoplasmic	9	1	0	0	not set	0	0	2	3	cytoplasmic	6	1	3	3	cytoplasmic	9	1	0	0	not set	0	0	2	3	cytoplasmic
ENSG00000106336	FBXO24	O75426	PE1	Chr7	HPA050951	no		yes	orthogonal	Premeiotic grp 1	Preleptotene spermatocytes,Spermatogonia	0	0	not set	0	0	0	0	not set	0	0	0	0	not set	0	0	0	0	not set	0	0	2	2	cytoplasmic,membrane	4	1	0	0	not set	0	0	0	0	not set	0	0	2	3	cytoplasmic,membrane
ENSG00000106341	PPP1R17	O96001	PE1	Chr7	HPA047819	no		no		Premeiotic grp 1	Preleptotene spermatocytes,Spermatogonia	0	0	not set	0	0	0	0	not set	0	0	0	0	not set	0	0	0	0	not set	0	0	2	3	cytoplasmic,nuclear	6	1	0	0	not set	0	0	0	0	not set	0	0	3	2	cytoplasmic,nuclear
ENSG00000106462	EZH2	Q15910	PE1	Chr7	CAB009589	no		yes	orthogonal		Elongated or late spermatids,Pachytene spermatocytes,Preleptotene spermatocytes,Round or early spermatids,Spermatogonia	0	0	not set	0	0	2	2	nuclear	4	1	3	3	nuclear	9	1	0	0	not set	0	0	3	3	nuclear	9	1	3	3	nuclear	9	1	0	0	not set	0	0	3	3	nuclear
ENSG00000106648	GALNTL5	Q7Z4T8	PE1	Chr7	HPA011140	no		yes	orthogonal	Meiotic and Postmeiotic grp 4	Elongated or late spermatids,Pachytene spermatocytes,Round or early spermatids	1	3	cytoplasmic	3	0	3	3	cytoplasmic	9	1	3	3	cytoplasmic,membrane	9	1	0	0	not set	0	0	1	3	cytoplasmic,membrane	3	0	3	3	cytoplasmic,membrane	9	1	0	0	not set	0	0	1	3	cytoplasmic,membrane
ENSG00000106686	SPATA6L	Q8N4H0	uPE1	Chr9	HPA039585	no		yes	orthogonal		Pachytene spermatocytes,Preleptotene spermatocytes,Sertoli cells,Spermatogonia	1	3	cytoplasmic	3	0	1	2	nuclear	2	0	2	2	nuclear	4	1	1	3	nuclear	3	0	2	2	nuclear	4	1	1	2	nuclear	2	0	2	2	cytoplasmic	4	1	3	3	nuclear
ENSG00000107105	ELAVL2	Q12926	PE1	Chr9	HPA063001	no		yes	orthogonal	Premeiotic grp 1	Preleptotene spermatocytes,Spermatogonia	0	0	not set	0	0	0	0	not set	0	0	0	0	not set	0	0	0	0	not set	0	0	3	3	cytoplasmic,membrane	9	1	0	0	not set	0	0	0	0	not set	0	0	3	3	cytoplasmic,membrane
ENSG00000109832	DDX25	Q9UHL0	PE1	Chr11	HPA020137	no		yes	orthogonal		Elongated or late spermatids,Pachytene spermatocytes,Preleptotene spermatocytes,Round or early spermatids,Spermatogonia	0	0	not set	0	0	3	3	cytoplasmic,membrane	9	1	3	3	cytoplasmic,membrane,nuclear	9	1	0	0	not set	0	0	3	3	cytoplasmic,membrane,nuclear	9	1	3	3	cytoplasmic,membrane,nuclear	9	1	0	0	not set	0	0	3	3	cytoplasmic,membrane,nuclear
ENSG00000110693	SOX6	P35712	PE1	Chr11	HPA003908	no		yes	orthogonal	Postmeiotic grp 5	Round or early spermatids	0	0	not set	0	0	1	2	nuclear	2	0	0	0	not set	0	0	0	0	not set	0	0	0	0	not set	0	0	3	3	nuclear	9	1	0	0	not set	0	0	0	0	not set
ENSG00000111254	AKAP3	O75969	PE1	Chr12	HPA039765	no		yes	orthogonal		Elongated or late spermatids,Spermatogonia	1	1	cytoplasmic	1	0	3	3	cytoplasmic	9	1	1	3	cytoplasmic	3	0	0	0	not set	0	0	1	3	cytoplasmic	3	0	1	3	cytoplasmic	3	0	0	0	not set	0	0	2	3	cytoplasmic
ENSG00000111644	ACRBP	Q8NEB7	PE1	Chr12	HPA039081	no		yes	orthogonal		Elongated or late spermatids,Pachytene spermatocytes,Preleptotene spermatocytes,Round or early spermatids,Spermatogonia	1	3	cytoplasmic	3	0	3	3	nuclear	9	1	2	3	cytoplasmic	6	1	0	0	not set	0	0	2	2	cytoplasmic,nuclear	4	1	3	3	cytoplasmic,nuclear	9	1	0	0	not set	0	0	2	3	cytoplasmic,nuclear
ENSG00000111783	RFX4	Q33E94	PE1	Chr12	HPA050527	no		yes	orthogonal		Pachytene spermatocytes,Peritubular cells,Round or early spermatids	0	0	not set	0	0	0	0	not set	0	0	3	3	nuclear	9	1	3	3	membrane	9	1	2	0.5	nuclear	1	0	3	2	nuclear	6	1	0	0	not set	0	0	0	0	not set
ENSG00000111981	ULBP1	Q9BZM6	PE1	Chr6	HPA007547	no		yes	orthogonal		Elongated or late spermatids,Sertoli cells	1	3	cytoplasmic	3	0	3	2	cytoplasmic	6	1	0	0	not set	0	0	0	0	not set	0	0	0	0	not set	0	0	0	0	not set	0	0	3	3	membrane	9	1	0	0	not set
ENSG00000112038	OPRM1	P35372	PE1	Chr6	HPA014509	no		yes	orthogonal		Elongated or late spermatids,Sertoli cells	0	0	not set	0	0	3	2	membrane	6	1	0	0	not set	0	0	0	0	not set	0	0	0	0	not set	0	0	3	1	membrane	3	0	3	3	membrane	9	1	0	0	not set
ENSG00000112273	HDGFL1	Q5TGJ6	uPE1	Chr6	HPA045679	no		yes	independent,orthogonal		Pachytene spermatocytes,Preleptotene spermatocytes,Round or early spermatids	0	0	not set	0	0	0	0	not set	0	0	3	3	nuclear	9	1	0	0	not set	0	0	2	3	nuclear	6	1	3	3	nuclear	9	1	0	0	not set	0	0	0	0	not set
ENSG00000112530	PACRG	Q96M98	PE1	Chr6	HPA066293	no		yes	orthogonal	Postmeiotic grp 5	Elongated or late spermatids	0	0	not set	0	0	3	2	cytoplasmic,membrane	6	1	0	0	not set	0	0	0	0	not set	0	0	0	0	not set	0	0	2	1	cytoplasmic,membrane	2	0	0	0	not set	0	0	1	1	cytoplasmic,membrane
ENSG00000114487	MORC1	Q86VD1	PE1	Chr3	HPA036413	no		no			Pachytene spermatocytes,Preleptotene spermatocytes,Round or early spermatids,Spermatogonia	1	3	cytoplasmic	3	0	1	0.5	cytoplasmic	0.5	0	3	3	cytoplasmic	9	1	0	0	not set	0	0	3	3	cytoplasmic	9	1	3	2	cytoplasmic	6	1	0	0	not set	0	0	2	3	cytoplasmic
ENSG00000115194	SLC30A3	Q99726	PE1	Chr2	HPA060505	no		yes	orthogonal	Postmeiotic grp 5	Elongated or late spermatids,Round or early spermatids	1	3	cytoplasmic	3	0	3	3	cytoplasmic,membrane	9	1	0	0	not set	0	0	0	0	not set	0	0	0	0	not set	0	0	3	3	cytoplasmic,membrane	9	1	0	0	not set	0	0	0	0	not set
ENSG00000115255	REEP6	Q96HR9	PE1	Chr19	HPA048015	yes	ENSG00000129625	yes	orthogonal		Leydig cells,Elongated or late spermatids,Pachytene spermatocytes,Preleptotene spermatocytes,Round or early spermatids,Sertoli cells,Spermatogonia	2	3	cytoplasmic,membrane	6	1	3	3	cytoplasmic,membrane	9	1	3	3	cytoplasmic,membrane	9	1	0	0	not set	0	0	3	3	cytoplasmic,membrane	9	1	3	3	cytoplasmic,membrane	9	1	3	3	cytoplasmic,membrane	9	1	3	3	cytoplasmic,membrane
ENSG00000115998	C2orf42	Q9NWW7	uPE1	Chr2	HPA031841	no		yes	orthogonal	Postmeiotic grp 5	Round or early spermatids	1	3	cytoplasmic	3	0	0	0	not set	0	0	1	3	nuclear	3	0	0	0	not set	0	0	1	2	cytoplasmic	2	0	3	3	nuclear	9	1	0	0	not set	0	0	1	2	cytoplasmic
ENSG00000116127	ALMS1		PE1	Chr2	HPA043200	no		yes	orthogonal	Meiotic and Postmeiotic grp 4	Elongated or late spermatids,Pachytene spermatocytes,Round or early spermatids	0	0	not set	0	0	3	3	cytoplasmic,membrane	9	1	3	3	cytoplasmic,membrane	9	1	0	0	not set	0	0	0	0	not set	0	0	3	3	cytoplasmic,membrane	9	1	0	0	not set	0	0	0	0	not set
ENSG00000116191	RALGPS2	Q86X27	PE1	Chr1	HPA027143	no		yes	independent,orthogonal	Meiotic and Postmeiotic grp 4	Elongated or late spermatids,Pachytene spermatocytes,Round or early spermatids	1	1	cytoplasmic	1	0	3	3	cytoplasmic,membrane	9	1	3	3	cytoplasmic,membrane	9	1	1	2	cytoplasmic,membrane	2	0	2	1	cytoplasmic,membrane	2	0	3	3	cytoplasmic,membrane	9	1	0	0	not set	0	0	2	1	cytoplasmic,membrane
ENSG00000117139	KDM5B	Q9UGL1	PE1	Chr1	CAB068193	no		yes	orthogonal		Leydig cells,Pachytene spermatocytes,Peritubular cells,Preleptotene spermatocytes,Round or early spermatids,Spermatogonia	2	3	nuclear	6	1	0	0	not set	0	0	3	3	nuclear	9	1	2	2	nuclear	4	1	2	3	nuclear	6	1	2	3	nuclear	6	1	0	0	not set	0	0	2	3	nuclear
ENSG00000117155	SSX2IP	Q9Y2D8	PE1	Chr1	HPA027306	no		no			Elongated or late spermatids,Pachytene spermatocytes,Round or early spermatids,Spermatogonia	1	2	cytoplasmic	2	0	3	3	cytoplasmic,membrane	9	1	2	2	cytoplasmic,membrane	4	1	0	0	not set	0	0	1	3	cytoplasmic,membrane	3	0	3	3	cytoplasmic,membrane	9	1	0	0	not set	0	0	2	2	cytoplasmic,membrane
ENSG00000117399	CDC20	Q12834	PE1	Chr1	CAB004525	no		yes	orthogonal	Premeiotic and meiotic grp2	Pachytene spermatocytes,Spermatogonia	0	0	not set	0	0	0	0	not set	0	0	3	3	cytoplasmic,nuclear	9	1	0	0	not set	0	0	1	1	cytoplasmic,nuclear	1	0	0	0	not set	0	0	0	0	not set	0	0	3	2	cytoplasmic,nuclear
ENSG00000118245	TNP1	P09430	PE1	Chr2	HPA044387	no		yes	orthogonal	Postmeiotic grp 5	Elongated or late spermatids,Round or early spermatids	0	0	not set	0	0	3	3	nuclear	9	1	0	0	not set	0	0	0	0	not set	0	0	0	0	not set	0	0	3	2	nuclear	6	1	0	0	not set	0	0	0	0	not set
ENSG00000118307	CASC1	Q6TDU7	uPE1	Chr12	HPA039662	no		yes	orthogonal	Postmeiotic grp 5	Elongated or late spermatids,Round or early spermatids	1	3	cytoplasmic	3	0	3	3	cytoplasmic	9	1	0	0	not set	0	0	0	0	not set	0	0	1	1	cytoplasmic	1	0	3	3	cytoplasmic,membrane	9	1	0	0	not set	0	0	1	2	cytoplasmic
ENSG00000118434	SPACA1	Q9HBV2	PE1	Chr6	HPA026744	no		yes	independent,orthogonal	Postmeiotic grp 5	Elongated or late spermatids,Round or early spermatids	1	2	cytoplasmic	2	0	3	3	cytoplasmic,membrane	9	1	0	0	not set	0	0	0	0	not set	0	0	0	0	not set	0	0	3	3	membrane	9	1	0	0	not set	0	0	0	0	not set
ENSG00000118492	ADGB	Q8N7X0	PE1	Chr6	HPA036340	no		yes	orthogonal	Meiotic and Postmeiotic grp 4	Elongated or late spermatids,Pachytene spermatocytes,Round or early spermatids	0	0	not set	0	0	2	3	cytoplasmic	6	1	2	2	cytoplasmic	4	1	0	0	not set	0	0	1	2	cytoplasmic	2	0	2	3	cytoplasmic	6	1	0	0	not set	0	0	1	2	cytoplasmic
ENSG00000119969	HELLS	Q9NRZ9	PE1	Chr10	CAB004491	no		yes	orthogonal	Premeiotic grp 1	Preleptotene spermatocytes	0	0	not set	0	0	0	0	not set	0	0	0	0	not set	0	0	0	0	not set	0	0	3	3	nuclear	9	1	0	0	not set	0	0	0	0	not set	0	0	0	0	not set
ENSG00000120160	EQTN	Q9NQ60	PE1	Chr9	HPA015089	no		yes	independent,orthogonal	Postmeiotic grp 5	Elongated or late spermatids,Round or early spermatids	1	1	cytoplasmic	1	0	3	3	membrane,nuclear	9	1	1	1	cytoplasmic	1	0	0	0	not set	0	0	1	1	cytoplasmic	1	0	3	3	cytoplasmic	9	1	0	0	not set	0	0	1	1	cytoplasmic
ENSG00000120210	INSL6	Q9Y581	PE1	Chr9	HPA021364	no		yes	orthogonal	Postmeiotic grp 5	Round or early spermatids	0	0	not set	0	0	3	1	nuclear	3	0	0	0	not set	0	0	0	0	not set	0	0	0	0	not set	0	0	3	3	membrane,nuclear	9	1	0	0	not set	0	0	0	0	not set
ENSG00000120498	TEX11	Q8IYF3	PE1	ChrX	HPA002950	no		no		Premeiotic and meiotic grp2	Pachytene spermatocytes,Preleptotene spermatocytes,Spermatogonia	0	0	not set	0	0	0	0	not set	0	0	2	3	nuclear	6	1	0	0	not set	0	0	3	2	nuclear	6	1	0	0	not set	0	0	0	0	not set	0	0	2	2	nuclear
ENSG00000121058	COIL	P38432	PE1	Chr17	CAB069400	no		yes	orthogonal		Pachytene spermatocytes,Preleptotene spermatocytes,Round or early spermatids,Spermatogonia	1	2	cytoplasmic,nuclear	2	0	0	0	not set	0	0	3	3	nuclear	9	1	1	1	nuclear	1	0	3	3	nuclear	9	1	3	3	nuclear	9	1	0	0	not set	0	0	2	3	nuclear
ENSG00000121152	NCAPH	Q15003	PE1	Chr2	HPA003008	no		yes	independent,orthogonal		Pachytene spermatocytes,Preleptotene spermatocytes,Round or early spermatids,Spermatogonia	0	0	not set	0	0	0	0	not set	0	0	2	3	cytoplasmic,membrane	6	1	0	0	not set	0	0	3	2	cytoplasmic,membrane	6	1	3	3	cytoplasmic,membrane	9	1	0	0	not set	0	0	2	2	cytoplasmic,membrane
ENSG00000121380	BCL2L14	Q9BZR8	PE1	Chr12	HPA040665	no		yes	orthogonal	Postmeiotic grp 5	Elongated or late spermatids	1	2	cytoplasmic	2	0	3	3	cytoplasmic,membrane	9	1	0	0	not set	0	0	0	0	not set	0	0	1	1	cytoplasmic,membrane	1	0	1	2	cytoplasmic	2	0	0	0	not set	0	0	1	2	cytoplasmic,membrane
ENSG00000121570	DPPA4	Q7L190	PE1	Chr3	HPA035249	no		no		Premeiotic grp 1	Preleptotene spermatocytes,Spermatogonia	1	3	cytoplasmic,nuclear	3	0	0	0	not set	0	0	1	3	nuclear	3	0	0	0	not set	0	0	2	3	nuclear	6	1	1	3	nuclear	3	0	0	0	not set	0	0	3	3	nuclear
ENSG00000122304	PRM2	P04554	PE1	Chr16	HPA056386	no		yes	orthogonal	Postmeiotic grp 5	Elongated or late spermatids	0	0	not set	0	0	3	3	cytoplasmic	9	1	0	0	not set	0	0	0	0	not set	0	0	0	0	not set	0	0	0	0	not set	0	0	0	0	not set	0	0	0	0	not set
ENSG00000122735	DNAI1	Q9UI46	PE1	Chr9	HPA021843	no		yes	independent,orthogonal		Elongated or late spermatids,Pachytene spermatocytes,Preleptotene spermatocytes,Round or early spermatids,Spermatogonia	0	0	not set	0	0	3	3	cytoplasmic,membrane	9	1	3	3	cytoplasmic,membrane	9	1	0	0	not set	0	0	2	2	cytoplasmic,membrane	4	1	3	3	cytoplasmic,membrane	9	1	0	0	not set	0	0	2	2	cytoplasmic,membrane
ENSG00000123165	ACTRT1	Q8TDG2	PE2	ChrX	HPA003119	no		no		Postmeiotic grp 5	Elongated or late spermatids,Round or early spermatids	1	3	cytoplasmic	3	0	2	3	cytoplasmic,nuclear	6	1	0	0	not set	0	0	0	0	not set	0	0	0	0	not set	0	0	3	2	cytoplasmic,nuclear	6	1	0	0	not set	0	0	0	0	not set
ENSG00000123576	ESX1	Q8N693	PE1	ChrX	HPA051992	no		yes	orthogonal	Premeiotic grp 1	Preleptotene spermatocytes,Spermatogonia	0	0	not set	0	0	0	0	not set	0	0	1	2	cytoplasmic	2	0	0	0	not set	0	0	2	3	cytoplasmic	6	1	1	2	cytoplasmic	2	0	0	0	not set	0	0	3	2	cytoplasmic
ENSG00000123977	DAW1	Q8N136	PE1	Chr2	HPA046118	no		no		Meiotic and Postmeiotic grp 4	Elongated or late spermatids,Pachytene spermatocytes,Round or early spermatids	0	0	not set	0	0	2	3	cytoplasmic,membrane	6	1	2	3	cytoplasmic,membrane	6	1	0	0	not set	0	0	0	0	not set	0	0	2	3	cytoplasmic,membrane	6	1	0	0	not set	0	0	0	0	not set
ENSG00000123999	INHA	P05111	PE1	Chr2	CAB000047	no		yes	orthogonal	Somatic grp 6	Leydig cells,Sertoli cells	3	3	cytoplasmic,membrane	9	1	0	0	not set	0	0	0	0	not set	0	0	0	0	not set	0	0	0	0	not set	0	0	0	0	not set	0	0	3	3	cytoplasmic,membrane	9	1	0	0	not set
ENSG00000124092	CTCFL	Q8NI51	PE1	Chr20	HPA001472	no		yes	orthogonal	Premeiotic grp 1	Preleptotene spermatocytes,Spermatogonia	1	3	cytoplasmic	3	0	1	1	cytoplasmic	1	0	1	3	cytoplasmic	3	0	0	0	not set	0	0	3	2	cytoplasmic	6	1	1	3	cytoplasmic	3	0	0	0	not set	0	0	2	3	cytoplasmic
ENSG00000124196	GTSF1L	Q9H1H1	uPE1	Chr20	HPA054694	no		yes	orthogonal	Postmeiotic grp 5	Elongated or late spermatids,Round or early spermatids	0	0	not set	0	0	3	2	cytoplasmic,nuclear	6	1	0	0	not set	0	0	2	1	cytoplasmic	2	0	0	0	not set	0	0	3	2	cytoplasmic,nuclear	6	1	0	0	not set	0	0	0	0	not set
ENSG00000124251	TP53TG5	Q9Y2B4	PE1	Chr20	HPA041979	no		yes	orthogonal		Elongated or late spermatids,Pachytene spermatocytes,Preleptotene spermatocytes,Round or early spermatids,Spermatogonia	1	3	cytoplasmic	3	0	2	3	cytoplasmic	6	1	2	3	cytoplasmic,membrane	6	1	0	0	not set	0	0	3	3	cytoplasmic,membrane	9	1	2	3	cytoplasmic,membrane	6	1	0	0	not set	0	0	3	3	cytoplasmic,membrane
ENSG00000124449	IRGC	Q6NXR0	PE1	Chr19	HPA046769	no		no		Postmeiotic grp 5	Elongated or late spermatids,Round or early spermatids	1	3	cytoplasmic,membrane	3	0	3	3	cytoplasmic,membrane	9	1	1	1	cytoplasmic	1	0	1	0.5	cytoplasmic	0.5	0	1	2	cytoplasmic	2	0	2	2	cytoplasmic,membrane	4	1	1	0.5	cytoplasmic	0.5	0	1	2	cytoplasmic
ENSG00000124490	CRISP2	P16562	PE1	Chr6	HPA031248	no		yes	orthogonal		Elongated or late spermatids,Pachytene spermatocytes,Preleptotene spermatocytes,Round or early spermatids,Spermatogonia	1	1	cytoplasmic	1	0	3	3	cytoplasmic,membrane,nuclear	9	1	3	3	cytoplasmic,membrane,nuclear	9	1	0	0	not set	0	0	3	3	cytoplasmic,membrane,nuclear	9	1	3	3	cytoplasmic,membrane,nuclear	9	1	0	0	not set	0	0	3	3	cytoplasmic,membrane,nuclear
ENSG00000124635	HIST1H2BJ	P06899	PE1	Chr6	HPA042205	yes	ENSG00000146047,ENSG00000158373,ENSG00000180596,ENSG00000184678,ENSG00000185130,ENSG00000196890,ENSG00000197903,ENSG00000203814,ENSG00000233822,ENSG00000234289,ENSG00000273703,ENSG00000273802,ENSG00000274290,ENSG00000274559,ENSG00000274641,ENSG00000275713,ENSG00000276410,ENSG00000277224,ENSG00000278588	no			Leydig cells,Pachytene spermatocytes,Peritubular cells,Preleptotene spermatocytes,Sertoli cells,Spermatogonia	3	3	nuclear	9	1	1	1	nuclear	1	0	2	3	nuclear	6	1	3	3	nuclear	9	1	3	3	nuclear	9	1	1	3	nuclear	3	0	2	3	nuclear	6	1	3	3	nuclear
ENSG00000124678	TCP11	Q8WWU5	PE1	Chr6	HPA048311	yes	ENSG00000215029	no		Postmeiotic grp 5	Elongated or late spermatids,Round or early spermatids	0	0	not set	0	0	3	3	cytoplasmic	9	1	0	0	not set	0	0	0	0	not set	0	0	0	0	not set	0	0	2	3	cytoplasmic	6	1	0	0	not set	0	0	0	0	not set
ENSG00000125046	SSUH2	Q9Y2M2	PE1	Chr3	HPA049777	no		no		Postmeiotic grp 5	Elongated or late spermatids	1	3	cytoplasmic	3	0	2	3	cytoplasmic	6	1	0	0	not set	0	0	0	0	not set	0	0	0	0	not set	0	0	1	3	cytoplasmic	3	0	0	0	not set	0	0	0	0	not set
ENSG00000125207	PIWIL1	Q96J94	PE1	Chr12	CAB012217	no		no			Leydig cells,Elongated or late spermatids,Pachytene spermatocytes,Preleptotene spermatocytes,Round or early spermatids	2	3	cytoplasmic	6	1	2	3	cytoplasmic	6	1	3	3	cytoplasmic	9	1	1	3	cytoplasmic	3	0	2	3	cytoplasmic	6	1	3	3	cytoplasmic	9	1	0	0	not set	0	0	1	3	cytoplasmic
ENSG00000125388	GRK4	P32298	PE1	Chr4	HPA057023	no		no		Premeiotic grp 1	Preleptotene spermatocytes,Spermatogonia	0	0	not set	0	0	0	0	not set	0	0	0	0	not set	0	0	0	0	not set	0	0	2	3	cytoplasmic,membrane	6	1	0	0	not set	0	0	0	0	not set	0	0	3	3	cytoplasmic,membrane
ENSG00000125878	TCF15	Q12870	PE2	Chr20	HPA050998	no		no			Elongated or late spermatids,Preleptotene spermatocytes,Round or early spermatids,Spermatogonia	0	0	not set	0	0	3	2	cytoplasmic,membrane	6	1	0	0	not set	0	0	0	0	not set	0	0	2	2	cytoplasmic,membrane	4	1	2	2	cytoplasmic,membrane	4	1	0	0	not set	0	0	3	2	cytoplasmic,membrane
ENSG00000125888	BANF2	Q9H503	PE1	Chr20	HPA042635	no		no			Elongated or late spermatids,Pachytene spermatocytes,Preleptotene spermatocytes,Round or early spermatids,Spermatogonia	1	1	cytoplasmic	1	0	3	3	cytoplasmic,nuclear	9	1	2	3	cytoplasmic,membrane	6	1	0	0	not set	0	0	2	2	cytoplasmic,membrane,nuclear	4	1	2	3	cytoplasmic,membrane,nuclear	6	1	0	0	not set	0	0	2	3	cytoplasmic,membrane,nuclear
ENSG00000125900	SIRPD	Q9H106	uPE1	Chr20	HPA042663	no		yes	orthogonal		Elongated or late spermatids,Pachytene spermatocytes,Peritubular cells,Round or early spermatids	1	3	cytoplasmic	3	0	3	3	cytoplasmic	9	1	2	3	cytoplasmic	6	1	3	3	cytoplasmic,membrane,nuclear	9	1	0	0	not set	0	0	3	3	cytoplasmic,nuclear	9	1	0	0	not set	0	0	0	0	not set
ENSG00000126752	SSX1	Q16384	PE1	ChrX	HPA045683	yes	ENSG00000165583,ENSG00000165584,ENSG00000187754,ENSG00000241476,ENSG00000268009,ENSG00000268447,ENSG00000269791	no		Premeiotic grp 1	Preleptotene spermatocytes,Spermatogonia	0	0	not set	0	0	0	0	not set	0	0	1	2	nuclear	2	0	0	0	not set	0	0	2	3	nuclear	6	1	0	0	not set	0	0	0	0	not set	0	0	3	3	nuclear
ENSG00000126787	DLGAP5	Q15398	PE1	Chr14	HPA005546	no		yes	orthogonal		Elongated or late spermatids,Pachytene spermatocytes,Preleptotene spermatocytes,Round or early spermatids,Spermatogonia	1	1	cytoplasmic	1	0	2	3	cytoplasmic,membrane	6	1	3	3	cytoplasmic,membrane	9	1	0	0	not set	0	0	3	2	cytoplasmic,membrane	6	1	3	3	cytoplasmic,membrane	9	1	0	0	not set	0	0	3	2	cytoplasmic,membrane
ENSG00000126803	HSPA2	P54652	PE1	Chr14	HPA052504	yes	ENSG00000109971,ENSG00000173110,ENSG00000204388,ENSG00000204389,ENSG00000204390	no		Meiotic and Postmeiotic grp 4	Elongated or late spermatids,Pachytene spermatocytes,Round or early spermatids	0	0	not set	0	0	3	3	cytoplasmic,membrane,nuclear	9	1	3	3	cytoplasmic,membrane,nuclear	9	1	0	0	not set	0	0	2	1	cytoplasmic,membrane,nuclear	2	0	3	3	cytoplasmic,membrane,nuclear	9	1	0	0	not set	0	0	2	1	cytoplasmic,membrane
ENSG00000126856	PRDM7	Q9NQW5	PE1	Chr16	HPA059944	no		no		Postmeiotic grp 5	Round or early spermatids	0	0	not set	0	0	0	0	not set	0	0	0	0	not set	0	0	0	0	not set	0	0	0	0	not set	0	0	2	3	cytoplasmic,membrane	6	1	0	0	not set	0	0	0	0	not set
ENSG00000126890	CTAG2	O75638	uPE1	ChrX	HPA071467	no		yes	orthogonal		Elongated or late spermatids,Pachytene spermatocytes,Preleptotene spermatocytes,Round or early spermatids,Spermatogonia	1	3	cytoplasmic	3	0	2	3	cytoplasmic,membrane	6	1	2	3	cytoplasmic,membrane	6	1	0	0	not set	0	0	3	3	cytoplasmic,membrane	9	1	2	3	cytoplasmic,membrane	6	1	0	0	not set	0	0	3	3	cytoplasmic,membrane
ENSG00000128322	IGLL1	P15814	PE1	Chr22	HPA071406	no		yes	orthogonal	Meiotic and Postmeiotic grp 4	Elongated or late spermatids,Pachytene spermatocytes,Round or early spermatids	0	0	not set	0	0	3	3	nuclear	9	1	2	3	nuclear	6	1	0	0	not set	0	0	0	0	not set	0	0	2	3	nuclear	6	1	0	0	not set	0	0	0	0	not set
ENSG00000128578	STRIP2	Q9ULQ0	PE1	Chr7	HPA019657	no		no			Pachytene spermatocytes,Peritubular cells,Round or early spermatids	1	3	cytoplasmic	3	0	1	2	cytoplasmic,membrane	2	0	2	2	cytoplasmic	4	1	3	3	cytoplasmic,membrane	9	1	1	0.5	cytoplasmic,membrane	0.5	0	2	3	cytoplasmic	6	1	0	0	not set	0	0	1	1	cytoplasmic,membrane
ENSG00000129295	LRRC6	Q86X45	PE1	Chr8	HPA028058	no		no		Meiotic and Postmeiotic grp 4	Pachytene spermatocytes,Round or early spermatids	0	0	not set	0	0	1	3	cytoplasmic,membrane	3	0	2	2	cytoplasmic,membrane	4	1	0	0	not set	0	0	0	0	not set	0	0	2	3	cytoplasmic,membrane	6	1	0	0	not set	0	0	0	0	not set
ENSG00000129810	SGO1	Q5FBB7	PE1	Chr3	HPA069857	no		yes	orthogonal	Meiotic grp 3	Pachytene spermatocytes	0	0	not set	0	0	0	0	not set	0	0	2	3	nuclear	6	1	0	0	not set	0	0	1	1	nuclear	1	0	0	0	not set	0	0	0	0	not set	0	0	1	2	nuclear
ENSG00000129862	VCY1B	O14598	PE1	ChrY	HPA049357	yes	ENSG00000129864,ENSG00000169059,ENSG00000177504,ENSG00000182583,ENSG00000205642	no			Elongated or late spermatids,Pachytene spermatocytes,Preleptotene spermatocytes,Round or early spermatids,Spermatogonia	0	0	not set	0	0	2	3	cytoplasmic,nuclear	6	1	3	3	nuclear	9	1	0	0	not set	0	0	3	3	nuclear	9	1	3	3	nuclear	9	1	0	0	not set	0	0	3	3	nuclear
ENSG00000129864	VCY	O14598	PE1	ChrY	HPA049357	yes	ENSG00000129862,ENSG00000169059,ENSG00000177504,ENSG00000182583,ENSG00000205642	no			Elongated or late spermatids,Pachytene spermatocytes,Preleptotene spermatocytes,Round or early spermatids,Spermatogonia	0	0	not set	0	0	2	3	cytoplasmic,nuclear	6	1	3	3	nuclear	9	1	0	0	not set	0	0	3	3	nuclear	9	1	3	3	nuclear	9	1	0	0	not set	0	0	3	3	nuclear
ENSG00000130377	ACSBG2	Q5FVE4	PE1	Chr19	HPA051013	no		yes	orthogonal	Postmeiotic grp 5	Elongated or late spermatids	0	0	not set	0	0	3	3	cytoplasmic	9	1	0	0	not set	0	0	0	0	not set	0	0	0	0	not set	0	0	0	0	not set	0	0	0	0	not set	0	0	0	0	not set
ENSG00000130518	IQCN	Q9H0B3	uPE1	Chr19	HPA042409	no		yes	orthogonal	Postmeiotic grp 5	Elongated or late spermatids	0	0	not set	0	0	3	3	cytoplasmic	9	1	0	0	not set	0	0	0	0	not set	0	0	0	0	not set	0	0	1	3	cytoplasmic	3	0	1	3	nuclear	3	0	0	0	not set
ENSG00000130695	CEP85	Q6P2H3	PE1	Chr1	HPA028252	no		no			Elongated or late spermatids,Pachytene spermatocytes,Preleptotene spermatocytes,Round or early spermatids,Spermatogonia	2	1	cytoplasmic	2	0	3	3	cytoplasmic,membrane	9	1	3	2	cytoplasmic,membrane	6	1	0	0	not set	0	0	2	3	cytoplasmic,membrane	6	1	3	2	cytoplasmic,membrane	6	1	0	0	not set	0	0	2	3	cytoplasmic,membrane
ENSG00000130943	PKDREJ	Q9NTG1	PE2	Chr22	HPA034587	no		yes	orthogonal	Premeiotic grp 1	Preleptotene spermatocytes,Spermatogonia	0	0	not set	0	0	0	0	not set	0	0	0	0	not set	0	0	0	0	not set	0	0	3	2	cytoplasmic,nuclear	6	1	0	0	not set	0	0	0	0	not set	0	0	3	2	cytoplasmic,nuclear
ENSG00000131019	ULBP3	Q9BZM4	PE1	Chr6	HPA063007	no		no		Postmeiotic grp 5	Elongated or late spermatids	0	0	not set	0	0	2	3	cytoplasmic,membrane	6	1	0	0	not set	0	0	0	0	not set	0	0	0	0	not set	0	0	1	0.5	cytoplasmic	0.5	0	0	0	not set	0	0	0	0	not set
ENSG00000131059	BPIFA3	Q9BQP9	PE1	Chr20	HPA062708	no		yes	orthogonal	Postmeiotic grp 5	Elongated or late spermatids	1	0.5	cytoplasmic	0.5	0	3	3	cytoplasmic	9	1	0	0	not set	0	0	0	0	not set	0	0	0	0	not set	0	0	1	0.5	cytoplasmic	0.5	0	0	0	not set	0	0	0	0	not set
ENSG00000131126	TEX101	Q9BY14	PE1	Chr19	HPA041915	no		yes	independent,orthogonal	Meiotic and Postmeiotic grp 4	Elongated or late spermatids,Pachytene spermatocytes,Round or early spermatids	0	0	not set	0	0	3	3	cytoplasmic,membrane	9	1	3	3	cytoplasmic,membrane	9	1	0	0	not set	0	0	0	0	not set	0	0	3	3	cytoplasmic,membrane	9	1	0	0	not set	0	0	0	0	not set
ENSG00000131470	PSMC3IP	Q9P2W1	PE1	Chr17	HPA044439	no		yes	orthogonal		Elongated or late spermatids,Pachytene spermatocytes,Preleptotene spermatocytes,Round or early spermatids,Spermatogonia	0	0	not set	0	0	3	3	nuclear	9	1	2	2	nuclear	4	1	0	0	not set	0	0	3	3	nuclear	9	1	3	3	cytoplasmic	9	1	0	0	not set	0	0	3	3	nuclear
ENSG00000131721	RHOXF2	Q9BQY4	PE1	ChrX	CAB020794	yes	ENSG00000203989	yes	orthogonal	Premeiotic and meiotic grp2	Pachytene spermatocytes,Preleptotene spermatocytes,Spermatogonia	0	0	not set	0	0	0	0	not set	0	0	3	2	cytoplasmic	6	1	0	0	not set	0	0	3	2	cytoplasmic	6	1	0	0	not set	0	0	0	0	not set	0	0	3	3	cytoplasmic
ENSG00000131747	TOP2A	P11388	PE1	Chr17	CAB002448	no		yes	orthogonal	Meiotic and Postmeiotic grp 4	Pachytene spermatocytes,Round or early spermatids	0	0	not set	0	0	0	0	not set	0	0	3	3	nuclear	9	1	0	0	not set	0	0	3	1	nuclear	3	0	3	3	nuclear	9	1	0	0	not set	0	0	2	1	nuclear
ENSG00000131773	KHDRBS3	O75525	PE1	Chr8	HPA000275	yes	ENSG00000112232	yes	orthogonal		Elongated or late spermatids,Pachytene spermatocytes,Preleptotene spermatocytes,Round or early spermatids,Sertoli cells,Spermatogonia	0	0	not set	0	0	2	2	cytoplasmic	4	1	3	3	nuclear	9	1	0	0	not set	0	0	3	3	nuclear	9	1	3	3	nuclear	9	1	2	3	nuclear	6	1	3	2	nuclear
ENSG00000132016	C19orf57	Q0VDD7	PE1	Chr19	HPA044012	no		yes	orthogonal		Elongated or late spermatids,Pachytene spermatocytes,Preleptotene spermatocytes,Spermatogonia	1	3	cytoplasmic,membrane,nuclear	3	0	2	3	cytoplasmic,membrane	6	1	2	3	nuclear	6	1	0	0	not set	0	0	3	3	nuclear	9	1	1	2	nuclear	2	0	0	0	not set	0	0	3	3	nuclear
ENSG00000132911	NMUR2	Q9GZQ4	PE1	Chr5	HPA045836	no		yes	orthogonal	Meiotic and Postmeiotic grp 4	Elongated or late spermatids,Pachytene spermatocytes,Round or early spermatids	1	3	cytoplasmic,membrane	3	0	3	2	cytoplasmic,membrane	6	1	3	3	cytoplasmic,membrane	9	1	1	1	cytoplasmic,membrane	1	0	1	2	cytoplasmic,membrane	2	0	2	2	cytoplasmic,membrane	4	1	2	1	membrane	2	0	2	1	cytoplasmic,membrane
ENSG00000132932	ATP8A2	Q9NTI2	PE1	Chr13	HPA039926	no		no			Elongated or late spermatids,Pachytene spermatocytes,Preleptotene spermatocytes,Round or early spermatids,Spermatogonia	1	3	cytoplasmic	3	0	3	3	cytoplasmic,membrane	9	1	3	3	cytoplasmic,membrane	9	1	0	0	not set	0	0	2	3	cytoplasmic,membrane	6	1	3	3	cytoplasmic,membrane	9	1	0	0	not set	0	0	3	3	cytoplasmic,membrane
ENSG00000133477	FAM83F	Q8NEG4	uPE1	Chr22	HPA051207	no		yes	orthogonal	Premeiotic grp 1	Preleptotene spermatocytes,Spermatogonia	2	1	cytoplasmic	2	0	1	2	cytoplasmic,membrane	2	0	1	2	cytoplasmic,membrane,nuclear	2	0	2	1	cytoplasmic,membrane	2	0	3	2	cytoplasmic,membrane,nuclear	6	1	1	2	cytoplasmic,membrane	2	0	0	0	not set	0	0	3	3	cytoplasmic,membrane,nuclear
ENSG00000133863	TEX15	Q9BXT5	PE1	Chr8	HPA036800	no		yes	orthogonal		Elongated or late spermatids,Preleptotene spermatocytes,Round or early spermatids,Spermatogonia	1	1	cytoplasmic,nuclear	1	0	2	3	cytoplasmic,nuclear	6	1	1	3	nuclear	3	0	0	0	not set	0	0	2	3	nuclear	6	1	2	3	nuclear	6	1	0	0	not set	0	0	2	3	nuclear
ENSG00000134007	ADAM20	O43506	PE2	Chr14	HPA059377	no		yes	orthogonal		Elongated or late spermatids,Spermatogonia	1	3	cytoplasmic	3	0	3	3	cytoplasmic	9	1	1	3	cytoplasmic	3	0	0	0	not set	0	0	1	3	cytoplasmic	3	0	1	3	cytoplasmic	3	0	0	0	not set	0	0	2	3	cytoplasmic
ENSG00000134627	PIWIL4	Q7Z3Z4	PE1	Chr11	HPA057508	no		yes	orthogonal		Elongated or late spermatids,Pachytene spermatocytes,Preleptotene spermatocytes,Round or early spermatids	1	2	cytoplasmic	2	0	3	3	cytoplasmic,nuclear	9	1	3	3	nuclear	9	1	0	0	not set	0	0	2	3	nuclear	6	1	2	3	nuclear	6	1	0	0	not set	0	0	3	1	nuclear
ENSG00000134668	SPOCD1	Q6ZMY3	PE1	Chr1	HPA031715	no		yes	orthogonal	Premeiotic grp 1	Spermatogonia	1	1	cytoplasmic	1	0	0	0	not set	0	0	0	0	not set	0	0	1	3	cytoplasmic	3	0	3	1	cytoplasmic,membrane,nuclear	3	0	0	0	not set	0	0	0	0	not set	0	0	3	3	cytoplasmic,membrane,nuclear
ENSG00000134940	ACRV1	P26436	PE1	Chr11	HPA038718	no		yes	independent,orthogonal	Postmeiotic grp 5	Elongated or late spermatids,Round or early spermatids	0	0	not set	0	0	3	3	cytoplasmic	9	1	1	1	cytoplasmic	1	0	0	0	not set	0	0	0	0	not set	0	0	3	3	cytoplasmic	9	1	0	0	not set	0	0	0	0	not set
ENSG00000135083	CCNJL	Q8IV13	PE2	Chr5	HPA049970	no		no		Meiotic grp 3	Pachytene spermatocytes	1	1	cytoplasmic,nuclear	1	0	0	0	not set	0	0	2	2	nuclear	4	1	0	0	not set	0	0	2	1	nuclear	2	0	0	0	not set	0	0	0	0	not set	0	0	1	1	nuclear
ENSG00000135631	RAB11FIP5	Q9BXF6	PE1	Chr2	HPA036407	no		yes	independent,orthogonal	Meiotic and Postmeiotic grp 4	Elongated or late spermatids,Pachytene spermatocytes,Round or early spermatids	1	3	cytoplasmic	3	0	3	3	cytoplasmic,membrane	9	1	2	3	cytoplasmic,membrane	6	1	0	0	not set	0	0	1	3	cytoplasmic,membrane	3	0	3	3	cytoplasmic,membrane	9	1	0	0	not set	0	0	1	1	cytoplasmic,membrane
ENSG00000136108	CKAP2	Q8WWK9	PE1	Chr13	HPA008410	no		yes	orthogonal	Meiotic grp 3	Pachytene spermatocytes	1	1	cytoplasmic	1	0	0	0	not set	0	0	3	3	cytoplasmic,membrane	9	1	0	0	not set	0	0	1	3	cytoplasmic,membrane	3	0	3	1	nuclear	3	0	0	0	not set	0	0	0	0	not set
ENSG00000136206	SPDYE1	Q8NFV5	PE2	Chr7	HPA051750	yes	ENSG00000170092,ENSG00000173678,ENSG00000183318,ENSG00000185040,ENSG00000205238,ENSG00000214300,ENSG00000260097	no		Postmeiotic grp 5	Elongated or late spermatids	0	0	not set	0	0	3	3	nuclear	9	1	0	0	not set	0	0	0	0	not set	0	0	0	0	not set	0	0	3	1	cytoplasmic,nuclear	3	0	0	0	not set	0	0	0	0	not set
ENSG00000136811	ODF2	Q5BJF6	PE1	Chr9	HPA001874	no		yes	orthogonal	Postmeiotic grp 5	Elongated or late spermatids,Round or early spermatids	0	0	not set	0	0	3	3	cytoplasmic	9	1	1	3	cytoplasmic	3	0	0	0	not set	0	0	1	3	cytoplasmic,nuclear	3	0	2	3	cytoplasmic,nuclear	6	1	0	0	not set	0	0	1	3	cytoplasmic,nuclear
ENSG00000136929	HEMGN	Q9BXL5	PE1	Chr9	HPA019606	no		yes	independent,orthogonal	Postmeiotic grp 5	Elongated or late spermatids,Round or early spermatids	0	0	not set	0	0	3	3	cytoplasmic,nuclear	9	1	1	2	cytoplasmic	2	0	0	0	not set	0	0	0	0	not set	0	0	3	3	cytoplasmic,nuclear	9	1	0	0	not set	0	0	0	0	not set
ENSG00000137090	DMRT1	Q9Y5R6	PE1	Chr9	HPA027850	no		yes	orthogonal	Premeiotic grp 1	Preleptotene spermatocytes,Spermatogonia	2	1	cytoplasmic	2	0	1	1	cytoplasmic	1	0	1	3	cytoplasmic	3	0	0	0	not set	0	0	3	2	cytoplasmic	6	1	1	2	cytoplasmic	2	0	0	0	not set	0	0	2	3	cytoplasmic
ENSG00000137098	SPAG8	Q99932	PE1	Chr9	HPA068012	no		yes	orthogonal	Meiotic and Postmeiotic grp 4	Elongated or late spermatids,Pachytene spermatocytes,Round or early spermatids	1	2	cytoplasmic,membrane	2	0	3	3	cytoplasmic,membrane	9	1	2	2	cytoplasmic,membrane	4	1	0	0	not set	0	0	1	1	cytoplasmic,membrane	1	0	2	3	cytoplasmic,membrane	6	1	0	0	not set	0	0	1	1	cytoplasmic,membrane
ENSG00000137225	CAPN11	Q9UMQ6	PE1	Chr6	HPA030955	no		yes	orthogonal	Meiotic and Postmeiotic grp 4	Elongated or late spermatids,Pachytene spermatocytes,Round or early spermatids	1	3	cytoplasmic	3	0	3	3	cytoplasmic,membrane	9	1	3	3	cytoplasmic,membrane	9	1	1	1	cytoplasmic,membrane	1	0	1	3	cytoplasmic,membrane	3	0	3	3	cytoplasmic,membrane	9	1	0	0	not set	0	0	1	3	cytoplasmic,membrane
ENSG00000137337	MDC1	Q14676	PE1	Chr6	HPA006915	no		yes	orthogonal		Leydig cells,Elongated or late spermatids,Pachytene spermatocytes,Preleptotene spermatocytes,Round or early spermatids	2	2	cytoplasmic,nuclear	4	1	3	3	cytoplasmic,membrane,nuclear	9	1	3	3	nuclear	9	1	0	0	not set	0	0	3	2	nuclear	6	1	3	3	nuclear	9	1	0	0	not set	0	0	1	2	nuclear
ENSG00000137812	KNL1	Q8NG31	PE1	Chr15	HPA026624	no		no		Premeiotic and meiotic grp2	Pachytene spermatocytes,Preleptotene spermatocytes,Spermatogonia	0	0	not set	0	0	0	0	not set	0	0	3	3	nuclear	9	1	0	0	not set	0	0	3	3	nuclear	9	1	0	0	not set	0	0	0	0	not set	0	0	3	3	nuclear
ENSG00000138378	STAT4	Q14765	PE1	Chr2	HPA001860	no		yes	orthogonal	Postmeiotic grp 5	Round or early spermatids	1	3	cytoplasmic	3	0	1	3	cytoplasmic,nuclear	3	0	1	3	cytoplasmic	3	0	0	0	not set	0	0	1	3	cytoplasmic	3	0	3	3	cytoplasmic,nuclear	9	1	0	0	not set	0	0	1	3	cytoplasmic
ENSG00000138646	HERC5	Q9UII4	PE1	Chr4	HPA043929	no		no		Premeiotic and meiotic grp2	Pachytene spermatocytes,Preleptotene spermatocytes,Spermatogonia	1	1	cytoplasmic	1	0	1	1	cytoplasmic,membrane	1	0	2	3	cytoplasmic,membrane	6	1	0	0	not set	0	0	3	3	cytoplasmic,membrane	9	1	1	1	cytoplasmic,membrane	1	0	0	0	not set	0	0	3	3	cytoplasmic,membrane
ENSG00000139351	SYCP3	Q8IZU3	PE1	Chr12	HPA043938	no		yes	orthogonal	Meiotic grp 3	Pachytene spermatocytes	1	2	cytoplasmic	2	0	0	0	not set	0	0	3	3	nuclear	9	1	0	0	not set	0	0	0	0	not set	0	0	0	0	not set	0	0	0	0	not set	0	0	0	0	not set
ENSG00000140067	FAM181A	Q8N9Y4	uPE1	Chr14	HPA001603	no		yes	orthogonal	Meiotic and Postmeiotic grp 4	Pachytene spermatocytes,Round or early spermatids	0	0	not set	0	0	1	3	cytoplasmic	3	0	3	2	cytoplasmic,membrane	6	1	0	0	not set	0	0	0	0	not set	0	0	3	3	cytoplasmic,membrane	9	1	0	0	not set	0	0	0	0	not set
ENSG00000140478	GOLGA6D	P0CG33	PE2	Chr15	HPA044978	yes	ENSG00000159289,ENSG00000167195,ENSG00000215186	no			Elongated or late spermatids,Round or early spermatids,Spermatogonia	1	1	cytoplasmic	1	0	3	3	cytoplasmic,membrane,nuclear	9	1	0	0	not set	0	0	0	0	not set	0	0	0	0	not set	0	0	3	3	cytoplasmic	9	1	0	0	not set	0	0	3	2	nuclear
ENSG00000140600	SH3GL3	Q99963	PE1	Chr15	HPA039381	no		yes	orthogonal	Postmeiotic grp 5	Elongated or late spermatids	0	0	not set	0	0	3	3	cytoplasmic,membrane	9	1	0	0	not set	0	0	0	0	not set	0	0	0	0	not set	0	0	0	0	not set	0	0	0	0	not set	0	0	0	0	not set
ENSG00000141096	DPEP3	Q9H4B8	PE1	Chr16	HPA058607	no		yes	independent,orthogonal	Meiotic and Postmeiotic grp 4	Elongated or late spermatids,Pachytene spermatocytes,Round or early spermatids	0	0	not set	0	0	3	3	cytoplasmic	9	1	3	3	cytoplasmic,membrane	9	1	0	0	not set	0	0	1	3	cytoplasmic,membrane	3	0	3	3	cytoplasmic,membrane	9	1	0	0	not set	0	0	0	0	not set
ENSG00000141316	SPACA3	Q8IXA5	PE1	Chr17	HPA023633	no		yes	orthogonal	Postmeiotic grp 5	Elongated or late spermatids,Round or early spermatids	0	0	not set	0	0	2	2	membrane,nuclear	4	1	0	0	not set	0	0	0	0	not set	0	0	0	0	not set	0	0	3	3	cytoplasmic,membrane,nuclear	9	1	0	0	not set	0	0	0	0	not set
ENSG00000141371	C17orf64	Q86WR6	uPE1	Chr17	HPA044415	no		yes	orthogonal	Meiotic and Postmeiotic grp 4	Elongated or late spermatids,Pachytene spermatocytes,Round or early spermatids	0	0	not set	0	0	2	2	cytoplasmic	4	1	2	2	nuclear	4	1	0	0	not set	0	0	0	0	not set	0	0	3	3	nuclear	9	1	0	0	not set	0	0	0	0	not set
ENSG00000142583	SLC2A5	P22732	PE1	Chr1	HPA005449	no		yes	orthogonal	Meiotic and Postmeiotic grp 4	Elongated or late spermatids,Pachytene spermatocytes,Round or early spermatids	0	0	not set	0	0	3	3	cytoplasmic,membrane	9	1	3	3	cytoplasmic,membrane	9	1	0	0	not set	0	0	0	0	not set	0	0	3	3	cytoplasmic,membrane	9	1	0	0	not set	0	0	0	0	not set
ENSG00000142609	CFAP74	Q9C0B2	PE1	Chr1	HPA028521	no		yes	independent,orthogonal	Postmeiotic grp 5	Elongated or late spermatids	0	0	not set	0	0	3	2	cytoplasmic	6	1	0	0	not set	0	0	0	0	not set	0	0	0	0	not set	0	0	0	0	not set	0	0	0	0	not set	0	0	0	0	not set
ENSG00000142621	FHAD1	B1AJZ9	uPE1	Chr1	HPA054284	no		yes	orthogonal	Postmeiotic grp 5	Elongated or late spermatids	0	0	not set	0	0	2	3	cytoplasmic,membrane	6	1	0	0	not set	0	0	0	0	not set	0	0	0	0	not set	0	0	1	1	cytoplasmic,membrane	1	0	0	0	not set	0	0	0	0	not set
ENSG00000142731	PLK4	O00444	PE1	Chr4	HPA035026	no		no		Postmeiotic grp 5	Elongated or late spermatids,Round or early spermatids	1	3	cytoplasmic,membrane	3	0	3	3	cytoplasmic,membrane	9	1	1	1	cytoplasmic,membrane	1	0	0	0	not set	0	0	1	1	cytoplasmic,membrane	1	0	3	3	cytoplasmic,membrane	9	1	0	0	not set	0	0	1	1	cytoplasmic,membrane
ENSG00000142794	NBPF3	Q9H094	PE2	Chr1	HPA044023	yes	ENSG00000162825,ENSG00000186086,ENSG00000196427,ENSG00000219481,ENSG00000263956,ENSG00000266338,ENSG00000268043,ENSG00000269713,ENSG00000270629,ENSG00000271254,ENSG00000271383,ENSG00000271425,ENSG00000273136	no		Postmeiotic grp 5	Elongated or late spermatids,Round or early spermatids	0	0	not set	0	0	3	3	cytoplasmic,membrane	9	1	0	0	not set	0	0	0	0	not set	0	0	0	0	not set	0	0	3	3	cytoplasmic	9	1	0	0	not set	0	0	0	0	not set
ENSG00000143006	DMRTB1	Q96MA1	PE1	Chr1	HPA036490	no		yes	independent,orthogonal		Leydig cells,Preleptotene spermatocytes,Sertoli cells,Spermatogonia	3	3	cytoplasmic	9	1	0	0	not set	0	0	1	1	cytoplasmic	1	0	0	0	not set	0	0	3	2	cytoplasmic	6	1	0	0	not set	0	0	3	2	cytoplasmic	6	1	3	3	cytoplasmic
ENSG00000143107	FNDC7	Q5VTL7	uPE1	Chr1	HPA054297	no		yes	orthogonal	Somatic grp 6	Sertoli cells	1	3	cytoplasmic	3	0	0	0	not set	0	0	0	0	not set	0	0	0	0	not set	0	0	0	0	not set	0	0	0	0	not set	0	0	3	3	cytoplasmic,membrane	9	1	0	0	not set
ENSG00000143443	C1orf56	Q9BUN1	PE1	Chr1	HPA037429	no		yes	independent,orthogonal	Postmeiotic grp 5	Elongated or late spermatids,Round or early spermatids	1	3	cytoplasmic	3	0	3	3	cytoplasmic,nuclear	9	1	1	1	cytoplasmic	1	0	0	0	not set	0	0	1	1	cytoplasmic	1	0	3	3	cytoplasmic	9	1	0	0	not set	0	0	1	1	cytoplasmic
ENSG00000143452	HORMAD1	Q86X24	PE1	Chr1	HPA037850	no		yes	orthogonal	Meiotic and Postmeiotic grp 4	Pachytene spermatocytes,Round or early spermatids	0	0	not set	0	0	0	0	not set	0	0	3	3	nuclear	9	1	0	0	not set	0	0	0	0	not set	0	0	3	3	nuclear	9	1	0	0	not set	0	0	1	1	nuclear
ENSG00000143552	NUP210L	Q5VU65	PE1	Chr1	HPA064245	no		yes	orthogonal	Meiotic and Postmeiotic grp 4	Elongated or late spermatids,Pachytene spermatocytes,Round or early spermatids	1	2	cytoplasmic	2	0	3	3	cytoplasmic	9	1	3	3	cytoplasmic,membrane	9	1	0	0	not set	0	0	1	1	cytoplasmic	1	0	3	3	cytoplasmic,membrane	9	1	0	0	not set	0	0	1	1	cytoplasmic
ENSG00000143702	CEP170	Q5SW79	PE1	Chr1	HPA042151	no		no		Postmeiotic grp 5	Elongated or late spermatids,Round or early spermatids	0	0	not set	0	0	3	3	cytoplasmic,membrane	9	1	1	2	cytoplasmic,membrane	2	0	0	0	not set	0	0	1	1	cytoplasmic,membrane	1	0	2	3	cytoplasmic,membrane	6	1	0	0	not set	0	0	1	3	cytoplasmic,membrane
ENSG00000144031	ANKRD53	Q8N9V6	PE1	Chr2	HPA049574	no		no		Somatic grp 6	Leydig cells,Sertoli cells	2	3	cytoplasmic,membrane	6	1	0	0	not set	0	0	0	0	not set	0	0	0	0	not set	0	0	0	0	not set	0	0	0	0	not set	0	0	3	3	cytoplasmic,membrane	9	1	0	0	not set
ENSG00000144868	TMEM108	Q6UXF1	PE1	Chr3	HPA063350	no		no		Premeiotic and meiotic grp2	Pachytene spermatocytes,Preleptotene spermatocytes,Spermatogonia	1	3	cytoplasmic,membrane	3	0	0	0	not set	0	0	3	2	cytoplasmic,membrane	6	1	0	0	not set	0	0	2	2	cytoplasmic,membrane	4	1	1	2	cytoplasmic,membrane	2	0	0	0	not set	0	0	3	3	cytoplasmic,membrane
ENSG00000144962	SPATA16	Q9BXB7	PE1	Chr3	HPA037884	no		yes	orthogonal	Premeiotic grp 1	Preleptotene spermatocytes,Spermatogonia	0	0	not set	0	0	0	0	not set	0	0	1	2	cytoplasmic	2	0	0	0	not set	0	0	2	2	cytoplasmic	4	1	1	3	cytoplasmic	3	0	0	0	not set	0	0	2	3	cytoplasmic
ENSG00000145309	CABS1	Q96KC9	PE1	Chr4	HPA044016	no		yes	independent,orthogonal	Postmeiotic grp 5	Elongated or late spermatids,Round or early spermatids	0	0	not set	0	0	3	3	cytoplasmic,nuclear	9	1	1	3	cytoplasmic	3	0	0	0	not set	0	0	0	0	not set	0	0	2	3	cytoplasmic,nuclear	6	1	0	0	not set	0	0	0	0	not set
ENSG00000145491	ROPN1L	Q96C74	PE1	Chr5	HPA041830	no		yes	independent,orthogonal	Postmeiotic grp 5	Elongated or late spermatids,Round or early spermatids	0	0	not set	0	0	3	3	cytoplasmic	9	1	1	3	cytoplasmic	3	0	0	0	not set	0	0	0	0	not set	0	0	2	3	cytoplasmic	6	1	0	0	not set	0	0	0	0	not set
ENSG00000145700	ANKRD31	Q8N7Z5	PE5	Chr5	HPA057566	no		yes	orthogonal		Leydig cells,Elongated or late spermatids,Pachytene spermatocytes,Preleptotene spermatocytes,Round or early spermatids	3	3	cytoplasmic,membrane	9	1	2	3	cytoplasmic	6	1	2	3	cytoplasmic	6	1	0	0	not set	0	0	2	3	cytoplasmic	6	1	2	3	cytoplasmic	6	1	0	0	not set	0	0	1	3	cytoplasmic
ENSG00000146047	HIST1H2BA	Q96A08	PE1	Chr6	CAB011603	yes	ENSG00000124635,ENSG00000158373,ENSG00000180596,ENSG00000184678,ENSG00000185130,ENSG00000196890,ENSG00000197903,ENSG00000203814,ENSG00000233822,ENSG00000234289,ENSG00000273703,ENSG00000273802,ENSG00000274290,ENSG00000274559,ENSG00000274641,ENSG00000275713,ENSG00000276410,ENSG00000277224,ENSG00000278588	yes	orthogonal		Leydig cells,Elongated or late spermatids,Pachytene spermatocytes,Preleptotene spermatocytes,Spermatogonia	2	3	cytoplasmic	6	1	3	3	nuclear	9	1	3	3	nuclear	9	1	0	0	not set	0	0	3	3	nuclear	9	1	0	0	not set	0	0	0	0	not set	0	0	3	3	nuclear
ENSG00000147081	AKAP4	Q5JQC9	PE1	ChrX	HPA005949	no		yes	independent,orthogonal	Postmeiotic grp 5	Elongated or late spermatids	1	1	cytoplasmic	1	0	3	3	cytoplasmic	9	1	1	2	cytoplasmic	2	0	0	0	not set	0	0	1	2	cytoplasmic	2	0	1	3	cytoplasmic	3	0	0	0	not set	0	0	0	0	not set
ENSG00000147174	GCNA	Q96QF7	uPE1	ChrX	HPA023476	no		yes	orthogonal		Elongated or late spermatids,Pachytene spermatocytes,Preleptotene spermatocytes,Spermatogonia	1	2	cytoplasmic	2	0	2	3	cytoplasmic	6	1	2	3	nuclear	6	1	0	0	not set	0	0	3	3	nuclear	9	1	1	3	nuclear	3	0	0	0	not set	0	0	3	3	nuclear
ENSG00000147180	ZNF711	Q9Y462	PE1	ChrX	HPA030654	no		yes	orthogonal		Leydig cells,Pachytene spermatocytes,Preleptotene spermatocytes,Sertoli cells,Spermatogonia	2	3	cytoplasmic,membrane,nuclear	6	1	1	2	cytoplasmic,membrane	2	0	2	2	nuclear	4	1	1	3	cytoplasmic,membrane,nuclear	3	0	3	3	nuclear	9	1	1	3	nuclear	3	0	3	2	nuclear	6	1	2	3	nuclear
ENSG00000147378	FATE1	Q969F0	PE1	ChrX	HPA034604	no		yes	orthogonal	Somatic grp 6	Sertoli cells	1	3	cytoplasmic	3	0	0	0	not set	0	0	0	0	not set	0	0	0	0	not set	0	0	0	0	not set	0	0	0	0	not set	0	0	2	3	cytoplasmic	6	1	0	0	not set
ENSG00000148019	CEP78	Q5JTW2	PE1	Chr9	HPA048846	no		no			Leydig cells,Elongated or late spermatids	2	2	cytoplasmic,membrane	4	1	3	3	cytoplasmic,membrane	9	1	1	2	cytoplasmic,membrane	2	0	1	1	cytoplasmic,membrane	1	0	1	1	cytoplasmic,membrane	1	0	1	2	cytoplasmic,membrane	2	0	0	0	not set	0	0	1	1	cytoplasmic,membrane
ENSG00000148156	ACTL7B	Q9Y614	PE1	Chr9	HPA021803	no		yes	independent		Elongated or late spermatids,Pachytene spermatocytes,Preleptotene spermatocytes,Round or early spermatids	1	3	cytoplasmic	3	0	3	3	cytoplasmic	9	1	2	3	cytoplasmic	6	1	1	0.5	cytoplasmic	0.5	0	2	2	cytoplasmic	4	1	2	3	cytoplasmic	6	1	0	0	not set	0	0	1	3	cytoplasmic
ENSG00000149507	OOSP2	Q86WS3	uPE1	Chr11	HPA050914	no		yes	orthogonal	Premeiotic grp 1	Preleptotene spermatocytes,Spermatogonia	0	0	not set	0	0	0	0	not set	0	0	0	0	not set	0	0	0	0	not set	0	0	2	3	cytoplasmic	6	1	0	0	not set	0	0	0	0	not set	0	0	3	3	cytoplasmic
ENSG00000149609	C20orf144	Q9BQM9	uPE1	Chr20	HPA019029	no		yes	orthogonal	Postmeiotic grp 5	Elongated or late spermatids,Round or early spermatids	0	0	not set	0	0	2	3	cytoplasmic	6	1	1	1	cytoplasmic	1	0	0	0	not set	0	0	1	1	cytoplasmic	1	0	3	2	cytoplasmic	6	1	0	0	not set	0	0	1	1	cytoplasmic
ENSG00000150628	SPATA4	Q8NEY3	PE1	Chr4	HPA019220	no		yes	orthogonal	Meiotic and Postmeiotic grp 4	Pachytene spermatocytes,Round or early spermatids	0	0	not set	0	0	0	0	not set	0	0	2	3	cytoplasmic	6	1	0	0	not set	0	0	0	0	not set	0	0	2	3	cytoplasmic	6	1	0	0	not set	0	0	0	0	not set
ENSG00000150783	TEX12	Q9BXU0	PE1	Chr11	HPA038290	no		yes	orthogonal	Meiotic and Postmeiotic grp 4	Elongated or late spermatids,Pachytene spermatocytes,Round or early spermatids	0	0	not set	0	0	2	3	cytoplasmic	6	1	3	3	nuclear	9	1	0	0	not set	0	0	1	0.5	nuclear	0.5	0	3	3	nuclear	9	1	0	0	not set	0	0	1	0.5	nuclear
ENSG00000151287	TEX30	Q5JUR7	PE1	Chr13	HPA053545	no		yes	orthogonal		Elongated or late spermatids,Pachytene spermatocytes,Preleptotene spermatocytes,Round or early spermatids	1	2	cytoplasmic,nuclear	2	0	3	3	cytoplasmic,membrane	9	1	3	3	nuclear	9	1	0	0	not set	0	0	2	3	nuclear	6	1	3	3	nuclear	9	1	0	0	not set	0	0	1	3	nuclear
ENSG00000152192	POU4F1	Q01851	PE2	Chr13	HPA068024	no		yes	orthogonal	Postmeiotic grp 5	Elongated or late spermatids	0	0	not set	0	0	3	3	cytoplasmic	9	1	0	0	not set	0	0	0	0	not set	0	0	0	0	not set	0	0	1	1	cytoplasmic,membrane	1	0	0	0	not set	0	0	0	0	not set
ENSG00000152430	BOLL	Q8N9W6	PE1	Chr2	HPA048813	no		yes	independent,orthogonal	Meiotic and Postmeiotic grp 4	Elongated or late spermatids,Pachytene spermatocytes,Round or early spermatids	1	3	cytoplasmic	3	0	2	3	cytoplasmic,membrane	6	1	3	3	cytoplasmic,membrane	9	1	0	0	not set	0	0	1	3	cytoplasmic	3	0	3	3	cytoplasmic,membrane	9	1	0	0	not set	0	0	1	3	cytoplasmic
ENSG00000152455	SUV39H2	Q9H5I1	PE1	Chr10	HPA057554	no		yes	orthogonal	Meiotic and Postmeiotic grp 4	Elongated or late spermatids,Pachytene spermatocytes,Round or early spermatids	1	3	cytoplasmic	3	0	3	3	cytoplasmic,membrane,nuclear	9	1	2	3	cytoplasmic,membrane,nuclear	6	1	0	0	not set	0	0	0	0	not set	0	0	3	3	cytoplasmic,membrane,nuclear	9	1	0	0	not set	0	0	0	0	not set
ENSG00000152670	DDX4	Q9NQI0	PE1	Chr5	CAB026170	no		yes	orthogonal		Elongated or late spermatids,Pachytene spermatocytes,Preleptotene spermatocytes,Round or early spermatids,Spermatogonia	1	3	cytoplasmic	3	0	3	3	cytoplasmic	9	1	3	3	cytoplasmic	9	1	0	0	not set	0	0	3	3	cytoplasmic	9	1	3	3	cytoplasmic	9	1	0	0	not set	0	0	3	3	cytoplasmic
ENSG00000153044	CENPH	Q9H3R5	PE1	Chr5	HPA036494	no		no			Leydig cells,Elongated or late spermatids	2	2	cytoplasmic,membrane	4	1	2	3	cytoplasmic,membrane	6	1	1	2	cytoplasmic,membrane	2	0	0	0	not set	0	0	1	1	cytoplasmic	1	0	1	3	cytoplasmic,membrane	3	0	0	0	not set	0	0	1	3	cytoplasmic
ENSG00000153132	CLGN	O14967	PE1	Chr4	HPA058627	no		yes	orthogonal	Meiotic and Postmeiotic grp 4	Pachytene spermatocytes,Round or early spermatids	0	0	not set	0	0	1	2	cytoplasmic,membrane	2	0	3	3	cytoplasmic,membrane	9	1	0	0	not set	0	0	0	0	not set	0	0	3	3	cytoplasmic,membrane	9	1	0	0	not set	0	0	0	0	not set
ENSG00000153347	FAM81B	Q96LP2	uPE1	Chr5	HPA072554	no		no			Leydig cells,Elongated or late spermatids	2	2	cytoplasmic,membrane	4	1	3	3	cytoplasmic,membrane	9	1	0	0	not set	0	0	0	0	not set	0	0	0	0	not set	0	0	0	0	not set	0	0	0	0	not set	0	0	0	0	not set
ENSG00000153779	TGIF2LX	Q8IUE1	PE1	ChrX	HPA034543	no		no			Round or early spermatids,Spermatogonia	0	0	not set	0	0	0	0	not set	0	0	0	0	not set	0	0	0	0	not set	0	0	1	3	nuclear	3	0	3	3	nuclear	9	1	0	0	not set	0	0	2	3	nuclear
ENSG00000154040	CABYR	O75952	PE1	Chr18	HPA040703	no		yes	orthogonal	Postmeiotic grp 5	Elongated or late spermatids	1	3	cytoplasmic	3	0	3	3	cytoplasmic,membrane	9	1	0	0	not set	0	0	0	0	not set	0	0	0	0	not set	0	0	0	0	not set	0	0	0	0	not set	0	0	0	0	not set
ENSG00000154227	CERS3	Q8IU89	PE1	Chr15	HPA024356	no		no			Elongated or late spermatids,Pachytene spermatocytes,Preleptotene spermatocytes,Round or early spermatids,Spermatogonia	1	3	cytoplasmic	3	0	3	3	cytoplasmic,membrane	9	1	2	3	cytoplasmic,membrane	6	1	0	0	not set	0	0	2	3	cytoplasmic,membrane	6	1	3	3	cytoplasmic,membrane	9	1	0	0	not set	0	0	3	3	cytoplasmic,membrane
ENSG00000154438	ASZ1	Q8WWH4	PE1	Chr7	HPA020558	no		yes	orthogonal		Elongated or late spermatids,Pachytene spermatocytes,Preleptotene spermatocytes,Round or early spermatids,Spermatogonia	1	2	cytoplasmic	2	0	3	2	cytoplasmic	6	1	3	3	cytoplasmic	9	1	0	0	not set	0	0	2	3	cytoplasmic	6	1	3	3	cytoplasmic	9	1	0	0	not set	0	0	2	3	cytoplasmic
ENSG00000154479	CCDC173	Q0VFZ6	uPE1	Chr2	HPA042995	no		no		Somatic grp 6	Leydig cells,Sertoli cells	2	3	cytoplasmic	6	1	0	0	not set	0	0	0	0	not set	0	0	0	0	not set	0	0	0	0	not set	0	0	0	0	not set	0	0	3	3	nuclear	9	1	0	0	not set
ENSG00000154548	SRSF12	Q8WXF0	PE1	Chr6	HPA049782	no		no		Postmeiotic grp 5	Elongated or late spermatids	0	0	not set	0	0	2	3	cytoplasmic,membrane	6	1	1	3	cytoplasmic,membrane	3	0	0	0	not set	0	0	0	0	not set	0	0	1	3	cytoplasmic,membrane	3	0	0	0	not set	0	0	0	0	not set
ENSG00000154645	CHODL	Q9H9P2	PE1	Chr21	HPA017282	no		yes	orthogonal		Elongated or late spermatids,Preleptotene spermatocytes,Spermatogonia	1	3	cytoplasmic,membrane	3	0	3	3	cytoplasmic,membrane	9	1	2	1	cytoplasmic,membrane	2	0	0	0	not set	0	0	3	2	cytoplasmic,membrane	6	1	1	1	cytoplasmic,membrane	1	0	0	0	not set	0	0	2	3	cytoplasmic,membrane
ENSG00000154920	EME1	Q96AY2	PE1	Chr17	CAB016127	no		no			Leydig cells,Pachytene spermatocytes,Preleptotene spermatocytes,Round or early spermatids,Spermatogonia	2	3	cytoplasmic,nuclear	6	1	0	0	not set	0	0	3	3	nuclear	9	1	0	0	not set	0	0	3	3	nuclear	9	1	3	3	nuclear	9	1	0	0	not set	0	0	2	3	nuclear
ENSG00000154928	EPHB1	P54762	PE1	Chr3	HPA067740	no		yes	orthogonal	Premeiotic grp 1	Preleptotene spermatocytes,Spermatogonia	1	3	cytoplasmic	3	0	1	3	cytoplasmic,membrane	3	0	1	3	cytoplasmic,membrane	3	0	0	0	not set	0	0	3	3	cytoplasmic,membrane	9	1	1	3	cytoplasmic,membrane	3	0	0	0	not set	0	0	3	3	cytoplasmic,membrane
ENSG00000155026	RSPH10B	P0C881	PE2	Chr7	HPA049182	yes	ENSG00000169402	no		Postmeiotic grp 5	Elongated or late spermatids,Round or early spermatids	0	0	not set	0	0	3	3	cytoplasmic	9	1	1	3	cytoplasmic	3	0	0	0	not set	0	0	0	0	not set	0	0	2	3	cytoplasmic	6	1	0	0	not set	0	0	0	0	not set
ENSG00000155085	AK9	Q5TCS8	PE1	Chr6	HPA036324	no		yes	independent		Leydig cells,Peritubular cells	3	2	nuclear	6	1	0	0	not set	0	0	0	0	not set	0	0	3	3	nuclear	9	1	0	0	not set	0	0	0	0	not set	0	0	2	1	nuclear	2	0	1	1	nuclear
ENSG00000155495	MAGEC1	O60732	uPE1	ChrX	HPA004622	no		yes	orthogonal	Premeiotic grp 1	Preleptotene spermatocytes,Spermatogonia	0	0	not set	0	0	0	0	not set	0	0	1	1	cytoplasmic	1	0	0	0	not set	0	0	2	3	cytoplasmic	6	1	0	0	not set	0	0	0	0	not set	0	0	3	3	cytoplasmic
ENSG00000155761	SPAG17	Q6Q759	PE1	Chr1	HPA028666	no		yes	orthogonal	Postmeiotic grp 5	Elongated or late spermatids,Round or early spermatids	0	0	not set	0	0	2	2	cytoplasmic,membrane	4	1	0	0	not set	0	0	0	0	not set	0	0	0	0	not set	0	0	2	2	cytoplasmic,membrane	4	1	0	0	not set	0	0	0	0	not set
ENSG00000156219	ART3	Q13508	PE1	Chr4	HPA011268	no		yes	orthogonal	Meiotic and Postmeiotic grp 4	Elongated or late spermatids,Pachytene spermatocytes,Round or early spermatids	1	3	cytoplasmic	3	0	3	3	cytoplasmic,membrane	9	1	3	3	cytoplasmic,membrane	9	1	0	0	not set	0	0	1	3	cytoplasmic,membrane	3	0	3	3	cytoplasmic,membrane	9	1	0	0	not set	0	0	1	3	cytoplasmic
ENSG00000156269	NAA11	Q9BSU3	PE1	Chr4	HPA035922	no		no			Elongated or late spermatids,Pachytene spermatocytes,Preleptotene spermatocytes,Round or early spermatids,Spermatogonia	0	0	not set	0	0	3	3	cytoplasmic,membrane	9	1	3	3	cytoplasmic,membrane	9	1	1	1	cytoplasmic,membrane	1	0	3	3	cytoplasmic,membrane	9	1	3	3	cytoplasmic,membrane	9	1	0	0	not set	0	0	3	3	cytoplasmic,membrane
ENSG00000157060	SHCBP1L	Q9BZQ2	PE1	Chr1	HPA036125	no		yes	independent,orthogonal		Leydig cells,Elongated or late spermatids,Pachytene spermatocytes,Round or early spermatids	2	2	cytoplasmic	4	1	3	3	cytoplasmic	9	1	3	3	cytoplasmic	9	1	0	0	not set	0	0	0	0	not set	0	0	3	3	cytoplasmic	9	1	0	0	not set	0	0	0	0	not set
ENSG00000157423	HYDIN	Q4G0P3	PE1	Chr16	HPA067155	no		yes	orthogonal	Postmeiotic grp 5	Elongated or late spermatids	0	0	not set	0	0	2	2	cytoplasmic,membrane	4	1	1	1	cytoplasmic,membrane	1	0	0	0	not set	0	0	2	1	cytoplasmic,membrane	2	0	1	2	cytoplasmic,membrane	2	0	0	0	not set	0	0	2	1	cytoplasmic,membrane
ENSG00000157456	CCNB2	O95067	PE1	Chr15	HPA008873	no		yes	orthogonal		Leydig cells,Pachytene spermatocytes,Peritubular cells,Preleptotene spermatocytes	3	2	cytoplasmic	6	1	1	0.5	cytoplasmic,membrane	0.5	0	3	3	cytoplasmic,membrane	9	1	2	2	cytoplasmic,membrane	4	1	2	2	cytoplasmic,membrane	4	1	1	1	cytoplasmic,membrane	1	0	0	0	not set	0	0	1	2	cytoplasmic,membrane
ENSG00000157851	DPYSL5	Q9BPU6	PE1	Chr2	HPA034544	no		yes	orthogonal	Postmeiotic grp 5	Elongated or late spermatids,Round or early spermatids	0	0	not set	0	0	2	3	cytoplasmic,membrane	6	1	1	3	cytoplasmic,membrane	3	0	0	0	not set	0	0	0	0	not set	0	0	2	3	cytoplasmic,membrane	6	1	0	0	not set	0	0	0	0	not set
ENSG00000157927	RADIL	Q96JH8	PE1	Chr7	HPA051776	no		no			Pachytene spermatocytes,Preleptotene spermatocytes,Round or early spermatids	0	0	not set	0	0	0	0	not set	0	0	3	3	cytoplasmic,membrane	9	1	0	0	not set	0	0	2	2	cytoplasmic,membrane	4	1	2	2	cytoplasmic,membrane	4	1	0	0	not set	0	0	1	2	cytoplasmic,membrane
ENSG00000158816	VWA5B1	Q5TIE3	uPE1	Chr1	HPA064829	no		yes	orthogonal	Meiotic and Postmeiotic grp 4	Elongated or late spermatids,Pachytene spermatocytes,Round or early spermatids	1	2	cytoplasmic	2	0	3	3	cytoplasmic,membrane	9	1	2	3	cytoplasmic,membrane	6	1	1	3	cytoplasmic	3	0	1	2	cytoplasmic,membrane	2	0	3	3	cytoplasmic,membrane	9	1	0	0	not set	0	0	1	2	cytoplasmic,membrane
ENSG00000159217	IGF2BP1	Q9NZI8	PE1	Chr17	HPA062273	no		yes	independent,orthogonal	Premeiotic grp 1	Preleptotene spermatocytes,Spermatogonia	1	1	nuclear	1	0	1	3	cytoplasmic,membrane	3	0	1	2	cytoplasmic,membrane	2	0	0	0	not set	0	0	3	3	cytoplasmic,membrane	9	1	1	3	cytoplasmic,membrane	3	0	0	0	not set	0	0	3	3	cytoplasmic,membrane
ENSG00000159289	GOLGA6A	Q9NYA3	PE2	Chr15	HPA044978	yes	ENSG00000140478,ENSG00000167195,ENSG00000215186	no			Elongated or late spermatids,Round or early spermatids,Spermatogonia	1	1	cytoplasmic	1	0	3	3	cytoplasmic,membrane,nuclear	9	1	0	0	not set	0	0	0	0	not set	0	0	0	0	not set	0	0	3	3	cytoplasmic	9	1	0	0	not set	0	0	3	2	nuclear
ENSG00000159708	LRRC36	Q1X8D7	uPE1	Chr16	HPA058479	no		yes	orthogonal	Postmeiotic grp 5	Elongated or late spermatids,Round or early spermatids	0	0	not set	0	0	3	3	cytoplasmic	9	1	1	3	cytoplasmic	3	0	0	0	not set	0	0	0	0	not set	0	0	2	3	cytoplasmic,membrane	6	1	0	0	not set	0	0	0	0	not set
ENSG00000160284	SPATC1L	Q9H0A9	uPE1	Chr21	HPA019165	no		no		Meiotic grp 3	Pachytene spermatocytes	0	0	not set	0	0	0	0	not set	0	0	3	3	cytoplasmic,membrane	9	1	0	0	not set	0	0	0	0	not set	0	0	0	0	not set	0	0	0	0	not set	0	0	0	0	not set
ENSG00000160813	PPP1R35	Q8TAP8	PE1	Chr7	HPA051607	no		yes	orthogonal	Somatic grp 6	Leydig cells	3	3	cytoplasmic,membrane	9	1	0	0	not set	0	0	0	0	not set	0	0	0	0	not set	0	0	0	0	not set	0	0	0	0	not set	0	0	0	0	not set	0	0	0	0	not set
ENSG00000160886	LY6K	Q17RY6	PE1	Chr8	CAB075742	no		yes	orthogonal	Meiotic grp 3	Pachytene spermatocytes	0	0	not set	0	0	1	3	cytoplasmic	3	0	3	3	cytoplasmic,membrane	9	1	0	0	not set	0	0	0	0	not set	0	0	1	3	cytoplasmic,membrane	3	0	0	0	not set	0	0	0	0	not set
ENSG00000161036	LRWD1	Q9UFC0	PE1	Chr7	HPA021320	no		yes	orthogonal		Elongated or late spermatids,Pachytene spermatocytes,Preleptotene spermatocytes,Round or early spermatids,Spermatogonia	1	3	cytoplasmic	3	0	2	3	cytoplasmic,nuclear	6	1	3	3	nuclear	9	1	0	0	not set	0	0	2	3	cytoplasmic,nuclear	6	1	3	3	cytoplasmic,nuclear	9	1	0	0	not set	0	0	3	3	cytoplasmic,nuclear
ENSG00000161328	LRRC56	Q8IYG6	PE2	Chr11	HPA038728	no		no		Somatic grp 6	Leydig cells,Peritubular cells,Sertoli cells	3	3	cytoplasmic,membrane	9	1	0	0	not set	0	0	0	0	not set	0	0	3	3	cytoplasmic,membrane	9	1	0	0	not set	0	0	0	0	not set	0	0	3	3	cytoplasmic,membrane	9	1	0	0	not set
ENSG00000161594	KLHL10	Q6JEL2	PE1	Chr17	HPA067538	no		yes	orthogonal	Postmeiotic grp 5	Elongated or late spermatids,Round or early spermatids	1	2	cytoplasmic	2	0	3	3	cytoplasmic	9	1	1	1	cytoplasmic	1	0	0	0	not set	0	0	1	1	cytoplasmic	1	0	3	3	cytoplasmic	9	1	0	0	not set	0	0	1	1	cytoplasmic
ENSG00000161798	AQP5	P55064	PE1	Chr12	HPA065008	no		yes	orthogonal	Meiotic and Postmeiotic grp 4	Elongated or late spermatids,Pachytene spermatocytes,Round or early spermatids	3	1	cytoplasmic,membrane	3	0	3	3	cytoplasmic,membrane	9	1	3	3	cytoplasmic,membrane	9	1	0	0	not set	0	0	0	0	not set	0	0	3	3	cytoplasmic,membrane	9	1	0	0	not set	0	0	0	0	not set
ENSG00000161800	RACGAP1	Q9H0H5	PE1	Chr12	HPA043912	no		yes	orthogonal		Elongated or late spermatids,Pachytene spermatocytes,Preleptotene spermatocytes,Round or early spermatids	0	0	not set	0	0	2	2	nuclear	4	1	3	3	nuclear	9	1	0	0	not set	0	0	2	2	nuclear	4	1	2	2	nuclear	4	1	0	0	not set	0	0	0	0	not set
ENSG00000161860	SYCE2	Q6PIF2	PE1	Chr19	HPA042080	no		yes	orthogonal	Meiotic and Postmeiotic grp 4	Pachytene spermatocytes,Round or early spermatids	1	1	cytoplasmic	1	0	0	0	not set	0	0	3	3	nuclear	9	1	0	0	not set	0	0	0	0	not set	0	0	2	3	nuclear	6	1	0	0	not set	0	0	0	0	not set
ENSG00000162148	PPP1R32	Q7Z5V6	PE1	Chr11	HPA039068	no		yes	orthogonal		Leydig cells,Elongated or late spermatids,Pachytene spermatocytes,Preleptotene spermatocytes,Round or early spermatids	2	2	cytoplasmic	4	1	3	3	cytoplasmic,membrane	9	1	2	3	cytoplasmic,membrane	6	1	1	1	cytoplasmic	1	0	2	2	cytoplasmic,membrane	4	1	3	3	cytoplasmic,membrane	9	1	0	0	not set	0	0	1	2	cytoplasmic,membrane
ENSG00000162374	ELAVL4	P26378	PE1	Chr1	CAB004442	no		yes	orthogonal		Pachytene spermatocytes,Preleptotene spermatocytes,Round or early spermatids,Spermatogonia	0	0	not set	0	0	1	3	cytoplasmic	3	0	2	3	nuclear	6	1	0	0	not set	0	0	3	3	nuclear	9	1	2	3	cytoplasmic,nuclear	6	1	0	0	not set	0	0	3	3	nuclear
ENSG00000162643	WDR63	Q8IWG1	PE1	Chr1	HPA038526	no		yes	orthogonal		Leydig cells,Elongated or late spermatids,Round or early spermatids	2	3	cytoplasmic,membrane	6	1	2	3	cytoplasmic,membrane	6	1	1	3	cytoplasmic,membrane	3	0	0	0	not set	0	0	1	2	cytoplasmic,membrane	2	0	3	3	cytoplasmic,membrane,nuclear	9	1	0	0	not set	0	0	1	3	cytoplasmic,membrane
ENSG00000162779	AXDND1	Q5T1B0	uPE1	Chr1	HPA071114	no		yes	orthogonal	Meiotic and Postmeiotic grp 4	Elongated or late spermatids,Pachytene spermatocytes,Round or early spermatids	1	1	cytoplasmic	1	0	3	3	cytoplasmic	9	1	3	3	cytoplasmic	9	1	0	0	not set	0	0	1	2	cytoplasmic	2	0	3	3	cytoplasmic	9	1	0	0	not set	0	0	1	3	cytoplasmic
ENSG00000163006	CCDC138	Q96M89	uPE1	Chr2	HPA054223	no		yes	orthogonal		Elongated or late spermatids,Pachytene spermatocytes,Preleptotene spermatocytes,Round or early spermatids,Spermatogonia	1	2	cytoplasmic,nuclear	2	0	2	3	cytoplasmic	6	1	2	2	nuclear	4	1	1	3	nuclear	3	0	2	3	nuclear	6	1	2	2	nuclear	4	1	0	0	not set	0	0	3	3	nuclear
ENSG00000163071	SPATA18	Q8TC71	PE1	Chr4	HPA036854	no		yes	independent,orthogonal		Leydig cells,Elongated or late spermatids	2	3	cytoplasmic	6	1	3	3	cytoplasmic,membrane	9	1	1	2	cytoplasmic,membrane	2	0	0	0	not set	0	0	0	0	not set	0	0	1	3	cytoplasmic,membrane	3	0	0	0	not set	0	0	0	0	not set
ENSG00000163114	PDHA2	P29803	PE1	Chr4	HPA047487	yes	ENSG00000131828	no		Postmeiotic grp 5	Elongated or late spermatids	1	3	cytoplasmic	3	0	3	3	cytoplasmic	9	1	0	0	not set	0	0	0	0	not set	0	0	0	0	not set	0	0	0	0	not set	0	0	0	0	not set	0	0	0	0	not set
ENSG00000163206	SMCP	P49901	PE1	Chr1	HPA035105	no		no			Elongated or late spermatids,Peritubular cells	1	2	cytoplasmic	2	0	3	3	cytoplasmic	9	1	0	0	not set	0	0	2	3	cytoplasmic	6	1	0	0	not set	0	0	1	1	cytoplasmic	1	0	0	0	not set	0	0	0	0	not set
ENSG00000163424	C3orf30	Q96M34	uPE1	Chr3	HPA062468	no		yes	orthogonal	Postmeiotic grp 5	Elongated or late spermatids,Round or early spermatids	0	0	not set	0	0	3	3	cytoplasmic	9	1	1	3	cytoplasmic	3	0	0	0	not set	0	0	1	1	cytoplasmic	1	0	2	3	cytoplasmic	6	1	0	0	not set	0	0	0	0	not set
ENSG00000163440	PDCL2	Q8N4E4	PE1	Chr4	HPA048260	no		yes	orthogonal	Postmeiotic grp 5	Elongated or late spermatids,Round or early spermatids	1	3	cytoplasmic	3	0	3	2	cytoplasmic	6	1	1	2	cytoplasmic	2	0	1	1	cytoplasmic	1	0	1	1	cytoplasmic	1	0	3	2	cytoplasmic	6	1	0	0	not set	0	0	1	3	cytoplasmic
ENSG00000163521	GLB1L	Q6UWU2	PE1	Chr2	HPA043058	no		yes	orthogonal	Meiotic and Postmeiotic grp 4	Elongated or late spermatids,Pachytene spermatocytes,Round or early spermatids	1	3	cytoplasmic	3	0	3	3	cytoplasmic,membrane,nuclear	9	1	2	3	cytoplasmic,membrane,nuclear	6	1	0	0	not set	0	0	1	1	cytoplasmic,membrane	1	0	3	3	cytoplasmic,membrane,nuclear	9	1	0	0	not set	0	0	0	0	not set
ENSG00000163535	SGO2	Q562F6	PE1	Chr2	HPA035163	no		yes	orthogonal	Meiotic grp 3	Pachytene spermatocytes	0	0	not set	0	0	0	0	not set	0	0	3	3	nuclear	9	1	0	0	not set	0	0	0	0	not set	0	0	0	0	not set	0	0	0	0	not set	0	0	0	0	not set
ENSG00000163577	EIF5A2	Q9GZV4	PE1	Chr3	HPA029090	no		no		Somatic grp 6	Leydig cells,Peritubular cells,Sertoli cells	3	2	nuclear	6	1	1	2	cytoplasmic,membrane	2	0	1	1	cytoplasmic,membrane	1	0	3	3	nuclear	9	1	1	1	cytoplasmic,membrane	1	0	1	2	cytoplasmic,membrane	2	0	3	3	nuclear	9	1	1	3	cytoplasmic,membrane
ENSG00000163645	ERICH6	Q7L0X2	uPE1	Chr3	HPA048373	no		yes	orthogonal	Premeiotic grp 1	Preleptotene spermatocytes,Spermatogonia	1	1	cytoplasmic	1	0	0	0	not set	0	0	1	1	cytoplasmic,membrane	1	0	0	0	not set	0	0	3	2	cytoplasmic,membrane,nuclear	6	1	0	0	not set	0	0	0	0	not set	0	0	3	3	cytoplasmic,membrane,nuclear
ENSG00000163793	DNAJC5G	Q8N7S2	PE2	Chr2	HPA041445	no		no			Elongated or late spermatids,Pachytene spermatocytes,Preleptotene spermatocytes,Round or early spermatids,Spermatogonia	0	0	not set	0	0	2	3	cytoplasmic,membrane	6	1	2	3	cytoplasmic,membrane	6	1	0	0	not set	0	0	2	3	cytoplasmic,membrane	6	1	2	3	cytoplasmic,membrane	6	1	0	0	not set	0	0	2	3	cytoplasmic,membrane,nuclear
ENSG00000163806	SPDYA	Q5MJ70	PE1	Chr2	HPA066214	no		yes	orthogonal		Leydig cells,Elongated or late spermatids,Pachytene spermatocytes,Round or early spermatids	2	2	nuclear	4	1	2	2	cytoplasmic	4	1	2	3	cytoplasmic,membrane	6	1	0	0	not set	0	0	1	2	cytoplasmic,membrane	2	0	2	3	cytoplasmic,membrane	6	1	0	0	not set	0	0	1	2	cytoplasmic,membrane
ENSG00000164070	HSPA4L	O95757	PE1	Chr4	HPA061446	no		yes	orthogonal	Meiotic and Postmeiotic grp 4	Elongated or late spermatids,Pachytene spermatocytes,Round or early spermatids	0	0	not set	0	0	3	3	cytoplasmic,nuclear	9	1	2	3	cytoplasmic,nuclear	6	1	0	0	not set	0	0	1	3	cytoplasmic,nuclear	3	0	3	3	cytoplasmic,nuclear	9	1	0	0	not set	0	0	1	3	cytoplasmic,nuclear
ENSG00000164398	ACSL6	Q9UKU0	PE1	Chr5	HPA040470	no		yes	orthogonal		Leydig cells,Elongated or late spermatids	2	3	cytoplasmic	6	1	3	3	cytoplasmic,membrane	9	1	1	2	membrane	2	0	0	0	not set	0	0	0	0	not set	0	0	1	2	cytoplasmic	2	0	0	0	not set	0	0	0	0	not set
ENSG00000164404	GDF9	O60383	PE1	Chr5	HPA069146	no		no		Somatic grp 6	Peritubular cells	0	0	not set	0	0	0	0	not set	0	0	0	0	not set	0	0	2	3	cytoplasmic,membrane,nuclear	6	1	0	0	not set	0	0	0	0	not set	0	0	0	0	not set	0	0	0	0	not set
ENSG00000164508	HIST1H2AA	Q96QV6	PE1	Chr6	HPA041189	yes	ENSG00000099284,ENSG00000113648,ENSG00000180573,ENSG00000181218,ENSG00000184260,ENSG00000184270,ENSG00000188486,ENSG00000196747,ENSG00000196787,ENSG00000196866,ENSG00000203812,ENSG00000246705,ENSG00000272196,ENSG00000274997,ENSG00000275221,ENSG00000276368,ENSG00000276903,ENSG00000277075,ENSG00000278463,ENSG00000278677,ENSG00000282988	no			Elongated or late spermatids,Pachytene spermatocytes,Preleptotene spermatocytes,Round or early spermatids,Spermatogonia	0	0	not set	0	0	3	3	nuclear	9	1	3	3	nuclear	9	1	0	0	not set	0	0	3	3	nuclear	9	1	3	3	nuclear	9	1	0	0	not set	0	0	3	3	nuclear
ENSG00000164611	PTTG1	O95997	PE1	Chr5	HPA045034	yes	ENSG00000250254	no		Meiotic grp 3	Pachytene spermatocytes	1	3	cytoplasmic	3	0	1	1	cytoplasmic,membrane	1	0	3	3	cytoplasmic,membrane	9	1	0	0	not set	0	0	1	2	not set	2	0	1	1	cytoplasmic,membrane	1	0	0	0	not set	0	0	0	0	not set
ENSG00000164627	KIF6	Q6ZMV9	PE1	Chr6	HPA038811	no		yes	orthogonal	Meiotic and Postmeiotic grp 4	Pachytene spermatocytes,Round or early spermatids	1	2	cytoplasmic,nuclear	2	0	1	2	cytoplasmic,membrane	2	0	2	3	cytoplasmic,membrane	6	1	0	0	not set	0	0	0	0	not set	0	0	2	3	cytoplasmic,membrane	6	1	0	0	not set	0	0	0	0	not set
ENSG00000164900	GBX1	Q14549	PE1	Chr7	HPA055783	no		no		Postmeiotic grp 5	Elongated or late spermatids	0	0	not set	0	0	2	2	cytoplasmic,membrane	4	1	0	0	not set	0	0	0	0	not set	0	0	0	0	not set	0	0	1	2	cytoplasmic,membrane	2	0	0	0	not set	0	0	0	0	not set
ENSG00000164972	C9orf24	Q8NCR6	PE1	Chr9	HPA053008	no		yes	orthogonal	Postmeiotic grp 5	Elongated or late spermatids	0	0	not set	0	0	3	3	membrane	9	1	0	0	not set	0	0	0	0	not set	0	0	0	0	not set	0	0	0	0	not set	0	0	0	0	not set	0	0	0	0	not set
ENSG00000165309	ARMC3	Q5W041	uPE1	Chr10	HPA037823	no		yes	independent,orthogonal		Leydig cells,Elongated or late spermatids,Round or early spermatids	2	3	cytoplasmic,membrane	6	1	2	3	cytoplasmic,membrane	6	1	1	2	cytoplasmic,membrane	2	0	0	0	not set	0	0	0	0	not set	0	0	2	3	cytoplasmic,membrane	6	1	0	0	not set	0	0	0	0	not set
ENSG00000165383	LRRC18	Q8N456	PE1	Chr10	HPA039256	no		yes	orthogonal	Postmeiotic grp 5	Elongated or late spermatids	0	0	not set	0	0	2	3	cytoplasmic,membrane	6	1	0	0	not set	0	0	0	0	not set	0	0	0	0	not set	0	0	0	0	not set	0	0	0	0	not set	0	0	0	0	not set
ENSG00000165480	SKA3	Q8IX90	PE1	Chr13	HPA039272	no		no		Meiotic and Postmeiotic grp 4	Elongated or late spermatids,Pachytene spermatocytes,Round or early spermatids	0	0	not set	0	0	2	3	cytoplasmic,membrane	6	1	3	2	cytoplasmic,membrane	6	1	0	0	not set	0	0	1	0.5	cytoplasmic,membrane	0.5	0	3	3	cytoplasmic,membrane	9	1	0	0	not set	0	0	0	0	not set
ENSG00000165509	MAGEC3	Q8TD91	uPE1	ChrX	HPA052067	no		no			Elongated or late spermatids,Pachytene spermatocytes,Preleptotene spermatocytes,Spermatogonia	0	0	not set	0	0	2	3	cytoplasmic,membrane	6	1	2	2	cytoplasmic,membrane	4	1	0	0	not set	0	0	3	3	cytoplasmic,membrane	9	1	1	3	cytoplasmic,membrane	3	0	1	3	cytoplasmic,membrane	3	0	3	3	cytoplasmic,membrane
ENSG00000165555	NOXRED1	Q6NXP6	PE1	Chr14	HPA055658	no		no		Meiotic grp 3	Pachytene spermatocytes	2	1	nuclear	2	0	0	0	not set	0	0	3	2	nuclear	6	1	0	0	not set	0	0	0	0	not set	0	0	0	0	not set	0	0	0	0	not set	0	0	0	0	not set
ENSG00000165568	AKR1E2	Q96JD6	PE1	Chr10	HPA037822	no		yes	orthogonal		Elongated or late spermatids,Preleptotene spermatocytes,Spermatogonia	1	3	cytoplasmic,membrane	3	0	2	3	cytoplasmic,membrane	6	1	1	2	cytoplasmic,membrane,nuclear	2	0	0	0	not set	0	0	3	2	cytoplasmic,membrane,nuclear	6	1	1	2	cytoplasmic,membrane,nuclear	2	0	0	0	not set	0	0	2	3	cytoplasmic,membrane,nuclear
ENSG00000165584	SSX3	Q99909	PE1	ChrX	HPA045683	yes	ENSG00000126752,ENSG00000165583,ENSG00000187754,ENSG00000241476,ENSG00000268009,ENSG00000268447,ENSG00000269791	no		Premeiotic grp 1	Preleptotene spermatocytes,Spermatogonia	0	0	not set	0	0	0	0	not set	0	0	1	2	nuclear	2	0	0	0	not set	0	0	2	3	nuclear	6	1	0	0	not set	0	0	0	0	not set	0	0	3	3	nuclear
ENSG00000165698	SPACA9	Q96E40	PE1	Chr9	HPA022243	no		yes	orthogonal	Postmeiotic grp 5	Elongated or late spermatids	0	0	not set	0	0	3	3	cytoplasmic,membrane	9	1	0	0	not set	0	0	0	0	not set	0	0	0	0	not set	0	0	0	0	not set	0	0	0	0	not set	0	0	0	0	not set
ENSG00000165959	CLMN	Q96JQ2	PE1	Chr14	HPA012634	no		yes	orthogonal	Postmeiotic grp 5	Elongated or late spermatids,Round or early spermatids	1	2	cytoplasmic,membrane	2	0	3	3	cytoplasmic,membrane,nuclear	9	1	1	2	cytoplasmic,membrane	2	0	0	0	not set	0	0	1	1	cytoplasmic,membrane,nuclear	1	0	2	3	cytoplasmic,membrane	6	1	0	0	not set	0	0	2	1	cytoplasmic,membrane,nuclear
ENSG00000166049	PASD1	Q8IV76	PE1	ChrX	HPA011122	no		yes	independent,orthogonal	Premeiotic grp 1	Preleptotene spermatocytes,Spermatogonia	1	1	cytoplasmic	1	0	0	0	not set	0	0	0	0	not set	0	0	0	0	not set	0	0	2	2	nuclear	4	1	0	0	not set	0	0	0	0	not set	0	0	3	3	nuclear
ENSG00000166069	TMCO5A	Q8N6Q1	uPE1	Chr15	HPA056530	no		yes	orthogonal	Postmeiotic grp 5	Elongated or late spermatids,Round or early spermatids	1	3	cytoplasmic	3	0	3	3	cytoplasmic,membrane	9	1	0	0	not set	0	0	1	1	cytoplasmic	1	0	0	0	not set	0	0	3	3	cytoplasmic,membrane	9	1	0	0	not set	0	0	0	0	not set
ENSG00000166118	SPATA19	Q7Z5L4	PE1	Chr11	HPA040082	no		yes	orthogonal	Meiotic and Postmeiotic grp 4	Elongated or late spermatids,Pachytene spermatocytes,Round or early spermatids	1	3	cytoplasmic	3	0	3	3	cytoplasmic,nuclear	9	1	2	3	cytoplasmic	6	1	0	0	not set	0	0	1	3	cytoplasmic	3	0	2	3	cytoplasmic	6	1	0	0	not set	0	0	1	2	cytoplasmic
ENSG00000166246	C16orf71	Q8IYS4	uPE1	Chr16	HPA049468	no		yes	orthogonal	Meiotic and Postmeiotic grp 4	Elongated or late spermatids,Pachytene spermatocytes,Round or early spermatids	1	1	cytoplasmic,membrane	1	0	3	3	cytoplasmic,membrane	9	1	3	3	cytoplasmic,membrane	9	1	0	0	not set	0	0	0	0	not set	0	0	3	3	cytoplasmic,membrane	9	1	0	0	not set	0	0	0	0	not set
ENSG00000166578	IQCD	Q96DY2	PE1	Chr12	HPA046810	no		no		Postmeiotic grp 5	Round or early spermatids	0	0	not set	0	0	0	0	not set	0	0	0	0	not set	0	0	0	0	not set	0	0	0	0	not set	0	0	3	3	cytoplasmic,membrane	9	1	0	0	not set	0	0	0	0	not set
ENSG00000166596	CFAP52	Q8N1V2	PE1	Chr17	HPA023247	no		yes	orthogonal	Meiotic and Postmeiotic grp 4	Elongated or late spermatids,Pachytene spermatocytes,Round or early spermatids	1	2	cytoplasmic	2	0	2	2	cytoplasmic,membrane	4	1	2	2	cytoplasmic,membrane	4	1	0	0	not set	0	0	0	0	not set	0	0	2	3	cytoplasmic,membrane	6	1	0	0	not set	0	0	0	0	not set
ENSG00000166669	ATF7IP2	Q5U623	PE1	Chr16	HPA041228	no		no			Elongated or late spermatids,Pachytene spermatocytes,Preleptotene spermatocytes,Round or early spermatids,Sertoli cells,Spermatogonia	1	2	cytoplasmic,membrane	2	0	2	3	cytoplasmic,membrane	6	1	3	3	nuclear	9	1	1	2	nuclear	2	0	2	3	nuclear	6	1	3	3	nuclear	9	1	2	3	nuclear	6	1	2	3	nuclear
ENSG00000166796	LDHC	P07864	PE1	Chr11	HPA045442	no		yes	orthogonal		Elongated or late spermatids,Pachytene spermatocytes,Preleptotene spermatocytes,Round or early spermatids	1	3	cytoplasmic	3	0	3	3	cytoplasmic	9	1	2	3	cytoplasmic	6	1	0	0	not set	0	0	2	3	cytoplasmic	6	1	3	3	cytoplasmic	9	1	0	0	not set	0	0	1	3	cytoplasmic
ENSG00000166851	PLK1	P53350	PE1	Chr16	HPA051638	no		no			Leydig cells,Pachytene spermatocytes,Peritubular cells,Sertoli cells	3	2	nuclear	6	1	0	0	not set	0	0	3	2	nuclear	6	1	3	3	nuclear	9	1	0	0	not set	0	0	0	0	not set	0	0	3	3	nuclear	9	1	0	0	not set
ENSG00000166856	GPR182	O15218	PE2	Chr12	HPA027037	no		yes	orthogonal		Preleptotene spermatocytes,Sertoli cells	0	0	not set	0	0	0	0	not set	0	0	1	1	cytoplasmic,membrane	1	0	0	0	not set	0	0	2	3	cytoplasmic,membrane	6	1	0	0	not set	0	0	2	2	cytoplasmic,membrane	4	1	2	1	cytoplasmic,membrane
ENSG00000167098	SUN5	Q8TC36	PE1	Chr20	HPA048529	no		yes	orthogonal	Postmeiotic grp 5	Round or early spermatids	1	3	cytoplasmic,membrane	3	0	1	1	cytoplasmic	1	0	0	0	not set	0	0	1	1	cytoplasmic,membrane	1	0	0	0	not set	0	0	3	2	cytoplasmic,membrane	6	1	0	0	not set	0	0	0	0	not set
ENSG00000167195	GOLGA6C	A6NDK9	PE1	Chr15	HPA044978	yes	ENSG00000140478,ENSG00000159289,ENSG00000215186	no			Elongated or late spermatids,Round or early spermatids,Spermatogonia	1	1	cytoplasmic	1	0	3	3	cytoplasmic,membrane,nuclear	9	1	0	0	not set	0	0	0	0	not set	0	0	0	0	not set	0	0	3	3	cytoplasmic	9	1	0	0	not set	0	0	3	2	nuclear
ENSG00000167554	ZNF610	Q8N9Z0	PE1	Chr19	HPA055771	no		yes	orthogonal		Leydig cells,Pachytene spermatocytes,Preleptotene spermatocytes,Round or early spermatids,Spermatogonia	2	2	membrane,nuclear	4	1	0	0	not set	0	0	3	3	cytoplasmic,membrane	9	1	1	3	nuclear	3	0	3	3	cytoplasmic,membrane	9	1	3	3	nuclear	9	1	0	0	not set	0	0	3	3	cytoplasmic,membrane
ENSG00000168026	TTC21A	Q8NDW8	PE1	Chr3	HPA035510	no		yes	orthogonal	Meiotic and Postmeiotic grp 4	Elongated or late spermatids,Pachytene spermatocytes,Round or early spermatids	0	0	not set	0	0	2	3	cytoplasmic	6	1	2	3	cytoplasmic	6	1	0	0	not set	0	0	0	0	not set	0	0	2	3	cytoplasmic	6	1	0	0	not set	0	0	0	0	not set
ENSG00000168454	TXNDC2	Q86VQ3	PE1	Chr18	HPA018817	no		yes	orthogonal		Elongated or late spermatids,Pachytene spermatocytes,Preleptotene spermatocytes,Round or early spermatids,Spermatogonia	1	2	cytoplasmic	2	0	3	3	cytoplasmic,nuclear	9	1	3	3	cytoplasmic,nuclear	9	1	0	0	not set	0	0	3	3	cytoplasmic,nuclear	9	1	3	3	cytoplasmic,nuclear	9	1	0	0	not set	0	0	3	3	cytoplasmic
ENSG00000168757	TSPY2	A6NKD2	PE2	ChrY	HPA049384	yes	ENSG00000228927,ENSG00000229549,ENSG00000233803,ENSG00000236424,ENSG00000258992	no		Premeiotic grp 1	Preleptotene spermatocytes,Spermatogonia	0	0	not set	0	0	0	0	not set	0	0	0	0	not set	0	0	0	0	not set	0	0	3	3	cytoplasmic	9	1	0	0	not set	0	0	0	0	not set	0	0	3	3	cytoplasmic
ENSG00000169059	VCX3A	Q9NNX9	PE2	ChrX	HPA049357	yes	ENSG00000129862,ENSG00000129864,ENSG00000177504,ENSG00000182583,ENSG00000205642	no			Elongated or late spermatids,Pachytene spermatocytes,Preleptotene spermatocytes,Round or early spermatids,Spermatogonia	0	0	not set	0	0	2	3	cytoplasmic,nuclear	6	1	3	3	nuclear	9	1	0	0	not set	0	0	3	3	nuclear	9	1	3	3	nuclear	9	1	0	0	not set	0	0	3	3	nuclear
ENSG00000169064	ZBBX	A8MT70	uPE1	Chr3	HPA036328	no		yes	independent,orthogonal		Elongated or late spermatids,Sertoli cells	0	0	not set	0	0	2	2	cytoplasmic,membrane	4	1	1	3	cytoplasmic,membrane	3	0	0	0	not set	0	0	0	0	not set	0	0	1	2	cytoplasmic,membrane	2	0	2	3	cytoplasmic,membrane	6	1	0	0	not set
ENSG00000169402	RSPH10B2	B2RC85	uPE1	Chr7	HPA049182	yes	ENSG00000155026	no		Postmeiotic grp 5	Elongated or late spermatids,Round or early spermatids	0	0	not set	0	0	3	3	cytoplasmic	9	1	1	3	cytoplasmic	3	0	0	0	not set	0	0	0	0	not set	0	0	2	3	cytoplasmic	6	1	0	0	not set	0	0	0	0	not set
ENSG00000169717	ACTRT2	Q8TDY3	uPE1	Chr1	HPA006480	no		yes	independent,orthogonal		Elongated or late spermatids,Pachytene spermatocytes,Preleptotene spermatocytes,Round or early spermatids,Spermatogonia	0	0	not set	0	0	3	3	cytoplasmic,nuclear	9	1	2	3	cytoplasmic	6	1	0	0	not set	0	0	2	3	cytoplasmic	6	1	3	3	cytoplasmic	9	1	1	3	cytoplasmic	3	0	2	3	cytoplasmic
ENSG00000169800	RBMY1F	Q15415	PE1	ChrY	HPA001534	yes	ENSG00000226941,ENSG00000234414,ENSG00000242389,ENSG00000242875,ENSG00000244395	no			Pachytene spermatocytes,Preleptotene spermatocytes,Round or early spermatids,Spermatogonia	0	0	not set	0	0	0	0	not set	0	0	3	3	nuclear	9	1	0	0	not set	0	0	3	3	nuclear	9	1	3	3	nuclear	9	1	0	0	not set	0	0	3	3	nuclear
ENSG00000169989	TIGD4	Q8IY51	PE1	Chr4	HPA035649	no		no			Leydig cells,Elongated or late spermatids,Pachytene spermatocytes,Preleptotene spermatocytes,Round or early spermatids,Spermatogonia	2	2	cytoplasmic,nuclear	4	1	3	3	cytoplasmic,membrane	9	1	3	3	nuclear	9	1	0	0	not set	0	0	3	2	nuclear	6	1	3	3	nuclear	9	1	0	0	not set	0	0	2	3	nuclear
ENSG00000170092	SPDYE5		PE3	Chr7	HPA051750	yes	ENSG00000136206,ENSG00000173678,ENSG00000183318,ENSG00000185040,ENSG00000205238,ENSG00000214300,ENSG00000260097	no		Postmeiotic grp 5	Elongated or late spermatids	0	0	not set	0	0	3	3	nuclear	9	1	0	0	not set	0	0	0	0	not set	0	0	0	0	not set	0	0	3	1	cytoplasmic,nuclear	3	0	0	0	not set	0	0	0	0	not set
ENSG00000170374	SP7	Q8TDD2	PE1	Chr12	HPA063202	no		yes	orthogonal		Elongated or late spermatids,Pachytene spermatocytes,Preleptotene spermatocytes,Spermatogonia	0	0	not set	0	0	2	3	cytoplasmic,membrane,nuclear	6	1	2	2	nuclear	4	1	0	0	not set	0	0	3	3	nuclear	9	1	2	1	nuclear	2	0	0	0	not set	0	0	3	3	nuclear
ENSG00000170464	DNAJC18	Q9H819	PE1	Chr5	HPA036538	no		no			Elongated or late spermatids,Sertoli cells	1	3	cytoplasmic	3	0	2	3	cytoplasmic,membrane	6	1	1	2	cytoplasmic	2	0	1	3	cytoplasmic,membrane	3	0	1	2	cytoplasmic	2	0	1	2	cytoplasmic	2	0	3	2	cytoplasmic,membrane	6	1	1	2	cytoplasmic
ENSG00000170613	FAM71B	Q8TC56	PE1	Chr5	HPA039478	no		yes	independent,orthogonal	Postmeiotic grp 5	Elongated or late spermatids,Round or early spermatids	0	0	not set	0	0	3	3	cytoplasmic	9	1	0	0	not set	0	0	0	0	not set	0	0	0	0	not set	0	0	3	3	cytoplasmic	9	1	0	0	not set	0	0	0	0	not set
ENSG00000170748	RBMXL2	O75526	PE1	Chr11	HPA051842	yes	ENSG00000175718	no			Pachytene spermatocytes,Preleptotene spermatocytes,Round or early spermatids,Spermatogonia	0	0	not set	0	0	0	0	not set	0	0	3	3	nuclear	9	1	0	0	not set	0	0	3	3	nuclear	9	1	3	3	nuclear	9	1	0	0	not set	0	0	3	3	nuclear
ENSG00000170948	MBD3L1	Q8WWY6	PE1	Chr19	HPA043121	no		no		Postmeiotic grp 5	Elongated or late spermatids,Round or early spermatids	0	0	not set	0	0	3	3	cytoplasmic	9	1	0	0	not set	0	0	0	0	not set	0	0	0	0	not set	0	0	3	3	nuclear	9	1	0	0	not set	0	0	0	0	not set
ENSG00000171478	SPACA5B	Q96QH8	PE1	ChrX	HPA047149	yes	ENSG00000171489	no		Postmeiotic grp 5	Elongated or late spermatids,Round or early spermatids	0	0	not set	0	0	3	3	nuclear	9	1	0	0	not set	0	0	0	0	not set	0	0	0	0	not set	0	0	3	3	cytoplasmic,nuclear	9	1	0	0	not set	0	0	0	0	not set
ENSG00000171489	SPACA5	Q96QH8	PE1	ChrX	HPA047149	yes	ENSG00000171478	no		Postmeiotic grp 5	Elongated or late spermatids,Round or early spermatids	0	0	not set	0	0	3	3	nuclear	9	1	0	0	not set	0	0	0	0	not set	0	0	0	0	not set	0	0	3	3	cytoplasmic,nuclear	9	1	0	0	not set	0	0	0	0	not set
ENSG00000171495	MROH2B	Q7Z745	PE1	Chr5	HPA059457	no		no		Postmeiotic grp 5	Elongated or late spermatids	1	3	cytoplasmic	3	0	3	3	cytoplasmic	9	1	1	3	cytoplasmic	3	0	0	0	not set	0	0	1	3	cytoplasmic	3	0	1	3	cytoplasmic	3	0	0	0	not set	0	0	1	3	cytoplasmic
ENSG00000171595	DNAI2	Q9GZS0	PE1	Chr17	CAB006245	no		yes	orthogonal	Meiotic and Postmeiotic grp 4	Elongated or late spermatids,Pachytene spermatocytes,Round or early spermatids	0	0	not set	0	0	3	3	cytoplasmic,membrane	9	1	3	2	cytoplasmic,membrane	6	1	0	0	not set	0	0	0	0	not set	0	0	3	3	cytoplasmic,membrane	9	1	0	0	not set	0	0	0	0	not set
ENSG00000171872	KLF17	Q5JT82	PE1	Chr1	HPA024629	no		yes	orthogonal	Postmeiotic grp 5	Elongated or late spermatids,Round or early spermatids	0	0	not set	0	0	3	3	cytoplasmic,membrane	9	1	1	2	cytoplasmic,membrane	2	0	0	0	not set	0	0	1	1	cytoplasmic,membrane	1	0	3	3	cytoplasmic,membrane,nuclear	9	1	0	0	not set	0	0	1	2	cytoplasmic,membrane
ENSG00000171989	LDHAL6B	Q9BYZ2	PE1	Chr15	HPA053962	no		yes	orthogonal	Meiotic and Postmeiotic grp 4	Elongated or late spermatids,Pachytene spermatocytes,Round or early spermatids	1	3	cytoplasmic	3	0	3	3	cytoplasmic	9	1	3	3	cytoplasmic	9	1	0	0	not set	0	0	0	0	not set	0	0	3	3	cytoplasmic	9	1	0	0	not set	0	0	0	0	not set
ENSG00000172073	TEX37	Q96LM6	uPE1	Chr2	HPA043987	no		yes	orthogonal		Elongated or late spermatids,Preleptotene spermatocytes,Spermatogonia	0	0	not set	0	0	3	3	cytoplasmic	9	1	1	3	cytoplasmic,nuclear	3	0	0	0	not set	0	0	3	2	cytoplasmic	6	1	1	3	cytoplasmic	3	0	0	0	not set	0	0	3	2	cytoplasmic
ENSG00000172137	CALB2	P22676	PE1	Chr16	CAB000106	no		no		Somatic grp 6	Leydig cells	3	3	cytoplasmic	9	1	0	0	not set	0	0	0	0	not set	0	0	0	0	not set	0	0	0	0	not set	0	0	0	0	not set	0	0	0	0	not set	0	0	0	0	not set
ENSG00000172426	RSPH9	Q9H1X1	PE1	Chr6	HPA031703	no		yes	orthogonal		Leydig cells,Elongated or late spermatids,Round or early spermatids	3	2	cytoplasmic,membrane	6	1	3	3	cytoplasmic,membrane	9	1	1	1	cytoplasmic,membrane	1	0	0	0	not set	0	0	0	0	not set	0	0	3	3	cytoplasmic,membrane	9	1	0	0	not set	0	0	0	0	not set
ENSG00000173013	CCDC96	Q2M329	uPE1	Chr4	HPA047546	no		yes	orthogonal		Leydig cells,Elongated or late spermatids,Pachytene spermatocytes,Round or early spermatids	3	3	cytoplasmic,membrane,nuclear	9	1	3	3	cytoplasmic,membrane	9	1	3	2	cytoplasmic,membrane	6	1	1	2	cytoplasmic,membrane	2	0	1	2	cytoplasmic,membrane	2	0	3	3	cytoplasmic,membrane	9	1	0	0	not set	0	0	1	2	membrane
ENSG00000173401	GLIPR1L1	Q6UWM5	PE1	Chr12	HPA042095	no		yes	orthogonal	Meiotic and Postmeiotic grp 4	Elongated or late spermatids,Pachytene spermatocytes,Round or early spermatids	1	2	cytoplasmic	2	0	3	3	cytoplasmic	9	1	2	2	cytoplasmic	4	1	0	0	not set	0	0	1	2	cytoplasmic	2	0	3	3	cytoplasmic	9	1	0	0	not set	0	0	1	1	cytoplasmic
ENSG00000173421	CCDC36	Q8IYA8	PE1	Chr3	HPA045690	no		no		Meiotic and Postmeiotic grp 4	Elongated or late spermatids,Pachytene spermatocytes,Round or early spermatids	1	3	cytoplasmic	3	0	3	3	cytoplasmic	9	1	3	3	cytoplasmic	9	1	0	0	not set	0	0	0	0	not set	0	0	3	3	cytoplasmic	9	1	0	0	not set	0	0	0	0	not set
ENSG00000173557	C2orf70	A6NJV1	uPE1	Chr2	HPA062453	no		yes	orthogonal		Elongated or late spermatids,Pachytene spermatocytes,Preleptotene spermatocytes,Round or early spermatids,Spermatogonia	0	0	not set	0	0	2	3	cytoplasmic,membrane,nuclear	6	1	3	3	cytoplasmic,membrane	9	1	0	0	not set	0	0	3	3	cytoplasmic,membrane,nuclear	9	1	3	3	cytoplasmic,membrane	9	1	0	0	not set	0	0	3	3	cytoplasmic,membrane,nuclear
ENSG00000173678	SPDYE2B	A6NHP3	PE3	Chr7	HPA051750	yes	ENSG00000136206,ENSG00000170092,ENSG00000183318,ENSG00000185040,ENSG00000205238,ENSG00000214300,ENSG00000260097	no		Postmeiotic grp 5	Elongated or late spermatids	0	0	not set	0	0	3	3	nuclear	9	1	0	0	not set	0	0	0	0	not set	0	0	0	0	not set	0	0	3	1	cytoplasmic,nuclear	3	0	0	0	not set	0	0	0	0	not set
ENSG00000173699	SPATA3	Q8NHX4	uPE1	Chr2	HPA018254	no		yes	orthogonal	Postmeiotic grp 5	Elongated or late spermatids	1	2	cytoplasmic	2	0	3	3	cytoplasmic	9	1	0	0	not set	0	0	0	0	not set	0	0	0	0	not set	0	0	1	1	cytoplasmic	1	0	0	0	not set	0	0	0	0	not set
ENSG00000173838	MARCH10	Q8NA82	PE1	Chr17	HPA023322	no		yes	orthogonal	Meiotic and Postmeiotic grp 4	Pachytene spermatocytes,Round or early spermatids	0	0	not set	0	0	0	0	not set	0	0	3	3	nuclear	9	1	0	0	not set	0	0	1	3	nuclear	3	0	3	3	nuclear	9	1	0	0	not set	0	0	1	3	nuclear
ENSG00000173894	CBX2	Q14781	PE1	Chr17	HPA023083	no		no			Elongated or late spermatids,Preleptotene spermatocytes,Spermatogonia	1	1	cytoplasmic	1	0	3	3	nuclear	9	1	0	0	not set	0	0	0	0	not set	0	0	2	2	nuclear	4	1	0	0	not set	0	0	0	0	not set	0	0	3	3	nuclear
ENSG00000174007	CEP19	Q96LK0	PE1	Chr3	HPA047614	no		yes	orthogonal	Postmeiotic grp 5	Elongated or late spermatids	1	3	cytoplasmic,membrane	3	0	3	3	cytoplasmic,membrane	9	1	0	0	not set	0	0	0	0	not set	0	0	0	0	not set	0	0	2	1	cytoplasmic,membrane	2	0	0	0	not set	0	0	0	0	not set
ENSG00000174015	SPERT	Q8NA61	PE1	Chr13	HPA039359	no		yes	independent,orthogonal	Postmeiotic grp 5	Elongated or late spermatids,Round or early spermatids	1	0.5	cytoplasmic	0.5	0	3	3	cytoplasmic	9	1	0	0	not set	0	0	0	0	not set	0	0	0	0	not set	0	0	2	3	cytoplasmic	6	1	0	0	not set	0	0	0	0	not set
ENSG00000174137	FAM53A	Q6NSI3	PE1	Chr4	HPA058138	no		yes	orthogonal		Pachytene spermatocytes,Preleptotene spermatocytes,Sertoli cells,Spermatogonia	1	2	cytoplasmic	2	0	1	3	cytoplasmic,nuclear	3	0	3	3	nuclear	9	1	0	0	not set	0	0	3	3	nuclear	9	1	1	3	nuclear	3	0	2	3	nuclear	6	1	3	3	nuclear
ENSG00000174898	CATSPERD	Q86XM0	PE1	Chr19	HPA024056	no		no		Postmeiotic grp 5	Elongated or late spermatids,Round or early spermatids	2	1	cytoplasmic	2	0	3	3	cytoplasmic,membrane	9	1	1	1	cytoplasmic	1	0	0	0	not set	0	0	1	2	cytoplasmic	2	0	3	2	cytoplasmic,membrane	6	1	0	0	not set	0	0	1	2	cytoplasmic
ENSG00000175520	UBQLN3	Q9H347	PE1	Chr11	HPA020547	no		yes	orthogonal	Postmeiotic grp 5	Elongated or late spermatids,Round or early spermatids	1	1	cytoplasmic	1	0	3	3	cytoplasmic	9	1	1	3	cytoplasmic	3	0	0	0	not set	0	0	1	3	cytoplasmic	3	0	3	3	cytoplasmic	9	1	0	0	not set	0	0	0	0	not set
ENSG00000175646	PRM1	P04553	PE1	Chr16	HPA055150	no		yes	orthogonal	Postmeiotic grp 5	Elongated or late spermatids	0	0	not set	0	0	3	3	cytoplasmic	9	1	0	0	not set	0	0	0	0	not set	0	0	0	0	not set	0	0	0	0	not set	0	0	0	0	not set	0	0	0	0	not set
ENSG00000175718	RBMXL3	Q8N7X1	PE1	ChrX	HPA051842	yes	ENSG00000170748	no			Pachytene spermatocytes,Preleptotene spermatocytes,Round or early spermatids,Spermatogonia	0	0	not set	0	0	0	0	not set	0	0	3	3	nuclear	9	1	0	0	not set	0	0	3	3	nuclear	9	1	3	3	nuclear	9	1	0	0	not set	0	0	3	3	nuclear
ENSG00000176160	HSF5	Q4G112	PE1	Chr17	HPA063613	no		yes	orthogonal		Leydig cells,Elongated or late spermatids,Pachytene spermatocytes,Round or early spermatids	2	2	membrane	4	1	2	3	nuclear	6	1	3	3	nuclear	9	1	0	0	not set	0	0	1	3	cytoplasmic,nuclear	3	0	3	3	nuclear	9	1	0	0	not set	0	0	0	0	not set
ENSG00000176256	HMGB4	Q8WW32	PE1	Chr1	HPA035699	no		yes	orthogonal	Postmeiotic grp 5	Elongated or late spermatids,Round or early spermatids	1	2	cytoplasmic	2	0	3	3	nuclear	9	1	0	0	not set	0	0	0	0	not set	0	0	0	0	not set	0	0	3	3	nuclear	9	1	0	0	not set	0	0	0	0	not set
ENSG00000176635	HORMAD2	Q8N7B1	PE1	Chr22	HPA003074	no		yes	orthogonal		Leydig cells,Pachytene spermatocytes	3	3	cytoplasmic	9	1	0	0	not set	0	0	2	3	nuclear	6	1	0	0	not set	0	0	1	1	nuclear	1	0	0	0	not set	0	0	0	0	not set	0	0	0	0	not set
ENSG00000176681	LRRC37A	A6NMS7	uPE1	Chr17	HPA042121	yes	ENSG00000176809,ENSG00000238083	no		Postmeiotic grp 5	Elongated or late spermatids,Round or early spermatids	0	0	not set	0	0	3	3	nuclear	9	1	0	0	not set	0	0	0	0	not set	0	0	0	0	not set	0	0	3	3	cytoplasmic,membrane,nuclear	9	1	0	0	not set	0	0	0	0	not set
ENSG00000176809	LRRC37A3	O60309	uPE1	Chr17	HPA042121	yes	ENSG00000176681,ENSG00000238083	no		Postmeiotic grp 5	Elongated or late spermatids,Round or early spermatids	0	0	not set	0	0	3	3	nuclear	9	1	0	0	not set	0	0	0	0	not set	0	0	0	0	not set	0	0	3	3	cytoplasmic,membrane,nuclear	9	1	0	0	not set	0	0	0	0	not set
ENSG00000176988	FMR1NB	Q8N0W7	uPE1	ChrX	HPA011284	no		yes	orthogonal		Elongated or late spermatids,Pachytene spermatocytes,Preleptotene spermatocytes,Round or early spermatids,Spermatogonia	1	3	cytoplasmic	3	0	3	3	cytoplasmic	9	1	3	3	cytoplasmic	9	1	0	0	not set	0	0	3	3	cytoplasmic	9	1	3	3	cytoplasmic	9	1	0	0	not set	0	0	3	3	cytoplasmic
ENSG00000177202	SPACA4	Q8TDM5	PE1	Chr19	HPA061302	no		yes	independent,orthogonal	Postmeiotic grp 5	Elongated or late spermatids,Round or early spermatids	0	0	not set	0	0	3	3	nuclear	9	1	0	0	not set	0	0	0	0	not set	0	0	0	0	not set	0	0	3	3	nuclear	9	1	0	0	not set	0	0	0	0	not set
ENSG00000177324	BEND2	Q8NDZ0	uPE1	ChrX	HPA013142	no		yes	orthogonal	Meiotic grp 3	Pachytene spermatocytes	0	0	not set	0	0	0	0	not set	0	0	3	2	nuclear	6	1	0	0	not set	0	0	2	1	nuclear	2	0	0	0	not set	0	0	0	0	not set	0	0	0	0	not set
ENSG00000177483	RBM44	Q6ZP01	PE1	Chr2	HPA003298	no		yes	orthogonal		Pachytene spermatocytes,Preleptotene spermatocytes	0	0	not set	0	0	1	2	cytoplasmic	2	0	3	3	cytoplasmic	9	1	0	0	not set	0	0	2	3	cytoplasmic	6	1	1	3	cytoplasmic	3	0	0	0	not set	0	0	0	0	not set
ENSG00000177504	VCX2	Q9H322	PE2	ChrX	HPA044642	yes	ENSG00000129862,ENSG00000129864,ENSG00000169059,ENSG00000182583,ENSG00000205642	yes	orthogonal		Pachytene spermatocytes,Preleptotene spermatocytes,Round or early spermatids,Spermatogonia	1	1	cytoplasmic	1	0	1	0.5	cytoplasmic	0.5	0	3	3	cytoplasmic,nuclear	9	1	0	0	not set	0	0	3	3	cytoplasmic,nuclear	9	1	3	3	cytoplasmic,nuclear	9	1	0	0	not set	0	0	3	3	cytoplasmic,nuclear
ENSG00000177602	HASPIN	Q8TF76	PE1	Chr17	HPA027422	no		no		Somatic grp 6	Leydig cells,Peritubular cells,Sertoli cells	3	3	cytoplasmic,membrane,nuclear	9	1	1	3	cytoplasmic,membrane	3	0	1	3	cytoplasmic,membrane	3	0	3	3	cytoplasmic,membrane,nuclear	9	1	1	1	cytoplasmic,membrane,nuclear	1	0	1	3	cytoplasmic,membrane	3	0	3	3	cytoplasmic,membrane,nuclear	9	1	0	0	not set
ENSG00000177673	TEX44	Q53QW1	uPE1	Chr2	HPA056433	no		yes	independent,orthogonal		Elongated or late spermatids,Pachytene spermatocytes,Preleptotene spermatocytes,Round or early spermatids	1	3	cytoplasmic	3	0	3	3	cytoplasmic	9	1	2	2	cytoplasmic	4	1	0	0	not set	0	0	2	2	cytoplasmic	4	1	2	2	cytoplasmic	4	1	0	0	not set	0	0	0	0	not set
ENSG00000177938	CAPZA3	Q96KX2	PE1	Chr12	HPA038688	no		yes	orthogonal		Elongated or late spermatids,Pachytene spermatocytes,Preleptotene spermatocytes,Round or early spermatids	1	2	cytoplasmic	2	0	3	3	cytoplasmic	9	1	2	2	cytoplasmic	4	1	1	1	cytoplasmic	1	0	2	2	cytoplasmic	4	1	2	3	cytoplasmic	6	1	0	0	not set	0	0	1	3	cytoplasmic
ENSG00000177992	SPATA31E1	Q6ZUB1	PE1	Chr9	HPA024253	no		yes	orthogonal	Meiotic and Postmeiotic grp 4	Elongated or late spermatids,Pachytene spermatocytes,Round or early spermatids	1	1	cytoplasmic	1	0	3	3	cytoplasmic	9	1	3	3	cytoplasmic,nuclear	9	1	0	0	not set	0	0	1	0.5	cytoplasmic	0.5	0	3	3	cytoplasmic,nuclear	9	1	0	0	not set	0	0	1	0.5	cytoplasmic
ENSG00000178021	TSPYL6	Q8N831	PE1	Chr2	HPA034700	no		yes	independent,orthogonal		Pachytene spermatocytes,Preleptotene spermatocytes,Round or early spermatids,Spermatogonia	0	0	not set	0	0	0	0	not set	0	0	3	3	nuclear	9	1	0	0	not set	0	0	3	3	nuclear	9	1	3	3	nuclear	9	1	0	0	not set	0	0	3	3	nuclear
ENSG00000178645	C10orf53	Q8N6V4	uPE1	Chr10	HPA037951	no		yes	orthogonal	Postmeiotic grp 5	Elongated or late spermatids,Round or early spermatids	0	0	not set	0	0	3	3	cytoplasmic	9	1	0	0	not set	0	0	0	0	not set	0	0	0	0	not set	0	0	2	3	cytoplasmic	6	1	0	0	not set	0	0	0	0	not set
ENSG00000179058	C9orf50	Q5SZB4	PE2	Chr9	HPA026743	no		yes	orthogonal	Meiotic and Postmeiotic grp 4	Elongated or late spermatids,Pachytene spermatocytes,Round or early spermatids	0	0	not set	0	0	3	3	cytoplasmic,membrane	9	1	2	2	cytoplasmic,membrane	4	1	0	0	not set	0	0	1	1	cytoplasmic,membrane	1	0	3	3	cytoplasmic,membrane	9	1	0	0	not set	0	0	1	1	cytoplasmic,membrane
ENSG00000179133	C10orf67	Q8IYJ2	uPE1	Chr10	HPA038131	no		no			Leydig cells,Elongated or late spermatids,Pachytene spermatocytes,Preleptotene spermatocytes,Round or early spermatids,Spermatogonia	2	3	cytoplasmic,membrane,nuclear	6	1	3	3	cytoplasmic,membrane	9	1	3	2	cytoplasmic,membrane,nuclear	6	1	1	0.5	cytoplasmic,membrane,nuclear	0.5	0	2	3	cytoplasmic,membrane,nuclear	6	1	3	3	cytoplasmic,membrane,nuclear	9	1	0	0	not set	0	0	2	3	cytoplasmic,membrane,nuclear
ENSG00000179361	ARID3B	Q8IVW6	PE1	Chr15	HPA050320	no		yes	orthogonal		Pachytene spermatocytes,Preleptotene spermatocytes,Round or early spermatids,Spermatogonia	0	0	not set	0	0	1	0.5	nuclear	0.5	0	2	2	nuclear	4	1	0	0	not set	0	0	3	3	nuclear	9	1	2	3	nuclear	6	1	0	0	not set	0	0	3	3	nuclear
ENSG00000179399	GPC5	P78333	PE1	Chr13	HPA040152	no		yes	orthogonal	Somatic grp 6	Leydig cells,Sertoli cells	2	3	cytoplasmic,membrane,nuclear	6	1	0	0	not set	0	0	0	0	not set	0	0	2	1	cytoplasmic,membrane,nuclear	2	0	0	0	not set	0	0	0	0	not set	0	0	3	3	cytoplasmic,membrane,nuclear	9	1	0	0	not set
ENSG00000179902	C1orf194	Q5T5A4	uPE1	Chr1	HPA049684	no		yes	orthogonal	Postmeiotic grp 5	Elongated or late spermatids,Round or early spermatids	1	2	cytoplasmic,nuclear	2	0	2	3	cytoplasmic,nuclear	6	1	1	2	cytoplasmic	2	0	1	1	cytoplasmic,nuclear	1	0	1	2	cytoplasmic,nuclear	2	0	2	2	cytoplasmic,nuclear	4	1	0	0	not set	0	0	1	1	cytoplasmic,nuclear
ENSG00000180483	DEFB119	Q8N690	PE1	Chr20	HPA043059	no		no			Peritubular cells,Sertoli cells	1	1	cytoplasmic	1	0	0	0	not set	0	0	0	0	not set	0	0	3	3	cytoplasmic	9	1	0	0	not set	0	0	0	0	not set	0	0	3	3	cytoplasmic	9	1	0	0	not set
ENSG00000180697	C3orf22	Q8N5N4	PE2	Chr3	HPA059199	no		yes	orthogonal	Premeiotic grp 1	Spermatogonia	0	0	not set	0	0	0	0	not set	0	0	0	0	not set	0	0	0	0	not set	0	0	3	1	cytoplasmic	3	0	0	0	not set	0	0	0	0	not set	0	0	3	3	cytoplasmic
ENSG00000180878	C11orf42	Q8N5U0	uPE1	Chr11	HPA063404	no		yes	orthogonal	Postmeiotic grp 5	Elongated or late spermatids	0	0	not set	0	0	3	3	cytoplasmic	9	1	0	0	not set	0	0	0	0	not set	0	0	0	0	not set	0	0	0	0	not set	0	0	0	0	not set	0	0	0	0	not set
ENSG00000181195	PENK	P01210	PE1	Chr8	HPA013138	no		yes	orthogonal	Premeiotic grp 1	Spermatogonia	0	0	not set	0	0	0	0	not set	0	0	0	0	not set	0	0	0	0	not set	0	0	0	0	not set	0	0	0	0	not set	0	0	0	0	not set	0	0	2	2	membrane
ENSG00000181433	SAGE1	Q9NXZ1	PE1	ChrX	HPA003208	no		yes	orthogonal	Premeiotic grp 1	Preleptotene spermatocytes,Spermatogonia	0	0	not set	0	0	0	0	not set	0	0	0	0	not set	0	0	0	0	not set	0	0	3	3	nuclear	9	1	0	0	not set	0	0	0	0	not set	0	0	3	3	nuclear
ENSG00000181626	ANKRD62	A6NC57	PE2	Chr18	HPA059835	no		yes	orthogonal		Pachytene spermatocytes,Preleptotene spermatocytes,Round or early spermatids,Spermatogonia	1	3	cytoplasmic	3	0	0	0	not set	0	0	2	3	nuclear	6	1	0	0	not set	0	0	2	3	nuclear	6	1	2	3	nuclear	6	1	0	0	not set	0	0	3	3	nuclear
ENSG00000182077			PE1	Chr10	HPA044613	no		yes	orthogonal		Leydig cells,Elongated or late spermatids,Round or early spermatids	3	3	cytoplasmic,membrane	9	1	3	3	cytoplasmic,membrane	9	1	0	0	not set	0	0	0	0	not set	0	0	0	0	not set	0	0	2	3	cytoplasmic,membrane	6	1	0	0	not set	0	0	0	0	not set
ENSG00000182264	IZUMO1	Q8IYV9	PE1	Chr19	HPA038104	no		yes	orthogonal	Postmeiotic grp 5	Elongated or late spermatids,Round or early spermatids	1	3	cytoplasmic	3	0	3	3	cytoplasmic,nuclear	9	1	0	0	not set	0	0	0	0	not set	0	0	0	0	not set	0	0	3	3	cytoplasmic,nuclear	9	1	0	0	not set	0	0	0	0	not set
ENSG00000182308	DCAF4L1	Q3SXM0	uPE1	Chr4	CAB073535	no		yes	orthogonal	Premeiotic grp 1	Preleptotene spermatocytes,Spermatogonia	1	1	cytoplasmic	1	0	1	3	cytoplasmic	3	0	1	3	cytoplasmic	3	0	1	2	cytoplasmic	2	0	3	3	cytoplasmic	9	1	1	3	cytoplasmic	3	0	0	0	not set	0	0	3	3	cytoplasmic
ENSG00000182459	TEX19	Q8NA77	PE1	Chr17	HPA054577	no		yes	orthogonal	Somatic grp 6	Sertoli cells	1	0.5	cytoplasmic	0.5	0	0	0	not set	0	0	0	0	not set	0	0	0	0	not set	0	0	0	0	not set	0	0	0	0	not set	0	0	3	3	cytoplasmic	9	1	0	0	not set
ENSG00000182583	VCX	Q9H320	PE2	ChrX	HPA049357	yes	ENSG00000129862,ENSG00000129864,ENSG00000169059,ENSG00000177504,ENSG00000205642	no			Elongated or late spermatids,Pachytene spermatocytes,Preleptotene spermatocytes,Round or early spermatids,Spermatogonia	0	0	not set	0	0	2	3	cytoplasmic,nuclear	6	1	3	3	nuclear	9	1	0	0	not set	0	0	3	3	nuclear	9	1	3	3	nuclear	9	1	0	0	not set	0	0	3	3	nuclear
ENSG00000183066	WBP2NL	Q6ICG8	PE1	Chr22	HPA048557	no		yes	orthogonal	Postmeiotic grp 5	Elongated or late spermatids	0	0	not set	0	0	3	3	cytoplasmic,nuclear	9	1	0	0	not set	0	0	0	0	not set	0	0	0	0	not set	0	0	0	0	not set	0	0	0	0	not set	0	0	0	0	not set
ENSG00000183246	RIMBP3C	A6NJZ7	PE1	Chr22	HPA001183	yes	ENSG00000274600,ENSG00000275793	no		Meiotic and Postmeiotic grp 4	Elongated or late spermatids,Pachytene spermatocytes,Round or early spermatids	1	3	cytoplasmic,nuclear	3	0	3	3	cytoplasmic	9	1	3	3	cytoplasmic	9	1	0	0	not set	0	0	1	3	cytoplasmic	3	0	3	3	cytoplasmic	9	1	0	0	not set	0	0	1	3	cytoplasmic
ENSG00000183318	SPDYE4	A6NLX3	PE2	Chr17	HPA051750	yes	ENSG00000136206,ENSG00000170092,ENSG00000173678,ENSG00000185040,ENSG00000205238,ENSG00000214300,ENSG00000260097	no		Postmeiotic grp 5	Elongated or late spermatids	0	0	not set	0	0	3	3	nuclear	9	1	0	0	not set	0	0	0	0	not set	0	0	0	0	not set	0	0	3	1	cytoplasmic,nuclear	3	0	0	0	not set	0	0	0	0	not set
ENSG00000183346	CABCOCO1	Q8IVU9	PE1	Chr10	HPA041398	no		yes	orthogonal	Postmeiotic grp 5	Elongated or late spermatids,Round or early spermatids	1	3	cytoplasmic	3	0	3	3	cytoplasmic,membrane	9	1	1	3	cytoplasmic,membrane	3	0	0	0	not set	0	0	0	0	not set	0	0	3	3	cytoplasmic,membrane	9	1	0	0	not set	0	0	0	0	not set
ENSG00000183496	MEX3B	Q6ZN04	PE1	Chr15	HPA041093	no		yes	orthogonal	Postmeiotic grp 5	Elongated or late spermatids	1	2	cytoplasmic,membrane	2	0	3	3	cytoplasmic,membrane	9	1	1	2	cytoplasmic,membrane	2	0	1	0.5	cytoplasmic,membrane	0.5	0	1	1	cytoplasmic,membrane	1	0	1	2	cytoplasmic,membrane	2	0	0	0	not set	0	0	0	0	not set
ENSG00000183831	ANKRD45	Q5TZF3	uPE1	Chr1	HPA031656	no		yes	independent,orthogonal	Postmeiotic grp 5	Elongated or late spermatids,Round or early spermatids	0	0	not set	0	0	2	3	cytoplasmic,membrane	6	1	1	3	cytoplasmic,membrane	3	0	0	0	not set	0	0	1	1	cytoplasmic,membrane	1	0	2	3	cytoplasmic,membrane	6	1	0	0	not set	0	0	1	1	cytoplasmic,membrane
ENSG00000183837	PNMA3	Q9UL41	PE1	ChrX	HPA047920	no		no		Somatic grp 6	Sertoli cells	0	0	not set	0	0	0	0	not set	0	0	0	0	not set	0	0	0	0	not set	0	0	0	0	not set	0	0	0	0	not set	0	0	3	3	nuclear	9	1	0	0	not set
ENSG00000183914	DNAH2	Q9P225	PE1	Chr17	HPA067103	no		yes	orthogonal	Premeiotic grp 1	Spermatogonia	0	0	not set	0	0	0	0	not set	0	0	0	0	not set	0	0	0	0	not set	0	0	2	1	cytoplasmic,membrane	2	0	0	0	not set	0	0	0	0	not set	0	0	2	2	cytoplasmic,membrane
ENSG00000184033	CTAG1B	P78358	uPE1	ChrX	CAB015453	no		yes	orthogonal		Pachytene spermatocytes,Preleptotene spermatocytes,Round or early spermatids,Spermatogonia	0	0	not set	0	0	0	0	not set	0	0	3	3	cytoplasmic,membrane,nuclear	9	1	0	0	not set	0	0	3	3	cytoplasmic,membrane,nuclear	9	1	2	3	cytoplasmic,membrane,nuclear	6	1	0	0	not set	0	0	3	3	cytoplasmic,membrane,nuclear
ENSG00000184378	ACTRT3	Q9BYD9	uPE1	Chr3	HPA035818	no		no			Leydig cells,Elongated or late spermatids,Round or early spermatids	2	2	cytoplasmic,nuclear	4	1	3	3	cytoplasmic,nuclear	9	1	0	0	not set	0	0	0	0	not set	0	0	0	0	not set	0	0	3	3	cytoplasmic,nuclear	9	1	0	0	not set	0	0	0	0	not set
ENSG00000184507	NUTM1	Q86Y26	uPE1	Chr15	HPA040421	no		yes	orthogonal		Preleptotene spermatocytes,Round or early spermatids,Spermatogonia	2	1	cytoplasmic	2	0	1	2	cytoplasmic	2	0	1	0.5	cytoplasmic	0.5	0	0	0	not set	0	0	2	2	cytoplasmic	4	1	3	3	cytoplasmic	9	1	0	0	not set	0	0	3	3	cytoplasmic
ENSG00000184599	FAM19A3	Q7Z5A8	PE2	Chr1	HPA055927	no		no			Leydig cells,Spermatogonia	3	3	cytoplasmic,nuclear	9	1	0	0	not set	0	0	0	0	not set	0	0	0	0	not set	0	0	0	0	not set	0	0	0	0	not set	0	0	0	0	not set	0	0	3	2	cytoplasmic,nuclear
ENSG00000185250	PPIL6	Q8IXY8	PE1	Chr6	HPA036717	no		no			Sertoli cells,Spermatogonia	1	1	cytoplasmic	1	0	0	0	not set	0	0	0	0	not set	0	0	1	1	cytoplasmic,membrane	1	0	1	2	cytoplasmic,membrane	2	0	0	0	not set	0	0	2	2	cytoplasmic,membrane	4	1	2	2	cytoplasmic,membrane
ENSG00000185264	TEX33	O43247	uPE1	Chr22	HPA005998	no		yes	orthogonal		Elongated or late spermatids,Spermatogonia	1	1	cytoplasmic	1	0	3	3	cytoplasmic	9	1	1	3	cytoplasmic	3	0	1	2	cytoplasmic	2	0	1	2	cytoplasmic	2	0	1	3	cytoplasmic	3	0	0	0	not set	0	0	2	3	nuclear
ENSG00000185306	C12orf56	Q8IXR9	PE2	Chr12	HPA056986	no		yes	orthogonal		Elongated or late spermatids,Sertoli cells	0	0	not set	0	0	2	3	cytoplasmic	6	1	0	0	not set	0	0	0	0	not set	0	0	0	0	not set	0	0	0	0	not set	0	0	2	2	nuclear	4	1	0	0	not set
ENSG00000185686	PRAME	P78395	PE1	Chr22	HPA045153	no		yes	orthogonal		Elongated or late spermatids,Pachytene spermatocytes,Preleptotene spermatocytes,Round or early spermatids,Spermatogonia	1	2	cytoplasmic	2	0	3	3	cytoplasmic,membrane	9	1	3	3	cytoplasmic,membrane	9	1	0	0	not set	0	0	3	2	cytoplasmic,membrane	6	1	2	3	cytoplasmic,membrane	6	1	0	0	not set	0	0	3	3	cytoplasmic,membrane,nuclear
ENSG00000185863	TMEM210	A6NLX4	uPE1	Chr9	HPA066907	no		yes	orthogonal	Postmeiotic grp 5	Elongated or late spermatids,Round or early spermatids	1	3	cytoplasmic,nuclear	3	0	3	3	cytoplasmic,nuclear	9	1	0	0	not set	0	0	0	0	not set	0	0	0	0	not set	0	0	3	3	cytoplasmic,nuclear	9	1	0	0	not set	0	0	0	0	not set
ENSG00000185888	PRSS38	A1L453	PE1	Chr1	HPA028003	no		no		Somatic grp 6	Leydig cells	3	3	cytoplasmic,membrane	9	1	0	0	not set	0	0	0	0	not set	0	0	0	0	not set	0	0	0	0	not set	0	0	0	0	not set	0	0	0	0	not set	0	0	0	0	not set
ENSG00000185955	C7orf61	Q8IZ16	uPE1	Chr7	HPA060395	no		yes	orthogonal	Postmeiotic grp 5	Elongated or late spermatids,Round or early spermatids	0	0	not set	0	0	3	3	nuclear	9	1	0	0	not set	0	0	0	0	not set	0	0	0	0	not set	0	0	3	3	membrane,nuclear	9	1	0	0	not set	0	0	0	0	not set
ENSG00000185988	PLK5	Q496M5	PE1	Chr19	HPA035024	no		yes	orthogonal	Premeiotic grp 1	Preleptotene spermatocytes,Spermatogonia	1	1	cytoplasmic	1	0	0	0	not set	0	0	0	0	not set	0	0	0	0	not set	0	0	2	2	cytoplasmic	4	1	0	0	not set	0	0	0	0	not set	0	0	3	2	cytoplasmic
ENSG00000186075	ZPBP2	Q6X784	PE1	Chr17	HPA027997	no		yes	independent,orthogonal	Meiotic and Postmeiotic grp 4	Elongated or late spermatids,Pachytene spermatocytes,Round or early spermatids	1	1	cytoplasmic	1	0	3	3	cytoplasmic	9	1	3	3	cytoplasmic	9	1	0	0	not set	0	0	1	2	cytoplasmic	2	0	3	3	cytoplasmic	9	1	0	0	not set	0	0	1	2	cytoplasmic
ENSG00000186288	PABPC1L2A	Q5JQF8	PE1	ChrX	HPA041573	yes	ENSG00000184388	no		Somatic grp 6	Peritubular cells	1	1	membrane	1	0	0	0	not set	0	0	0	0	not set	0	0	2	3	cytoplasmic,membrane	6	1	0	0	not set	0	0	0	0	not set	0	0	0	0	not set	0	0	0	0	not set
ENSG00000186471	AKAP14	Q86UN6	PE1	ChrX	HPA060999	no		yes	orthogonal		Elongated or late spermatids,Pachytene spermatocytes,Preleptotene spermatocytes,Round or early spermatids,Sertoli cells	0	0	not set	0	0	3	3	cytoplasmic,membrane	9	1	2	2	cytoplasmic,membrane	4	1	0	0	not set	0	0	2	2	cytoplasmic,membrane	4	1	2	3	cytoplasmic,membrane	6	1	2	3	cytoplasmic,membrane	6	1	1	1	cytoplasmic
ENSG00000187003	ACTL7A	Q9Y615	PE1	Chr9	HPA021624	no		yes	orthogonal	Postmeiotic grp 5	Elongated or late spermatids,Round or early spermatids	0	0	not set	0	0	3	3	cytoplasmic	9	1	0	0	not set	0	0	0	0	not set	0	0	0	0	not set	0	0	3	3	cytoplasmic,membrane	9	1	0	0	not set	0	0	0	0	not set
ENSG00000187017	ESPN	B1AK53	PE1	Chr1	HPA028674	no		yes	orthogonal	Somatic grp 6	Sertoli cells	0	0	not set	0	0	0	0	not set	0	0	0	0	not set	0	0	0	0	not set	0	0	0	0	not set	0	0	0	0	not set	0	0	3	3	membrane,nuclear	9	1	0	0	not set
ENSG00000187186	AL162231.1		#N/A	Chr9	HPA069617	no		yes	orthogonal		Elongated or late spermatids,Round or early spermatids,Sertoli cells	0	0	not set	0	0	3	2	nuclear	6	1	0	0	not set	0	0	0	0	not set	0	0	1	3	cytoplasmic	3	0	3	3	nuclear	9	1	3	3	nuclear	9	1	0	0	not set
ENSG00000187191	DAZ3	Q9NR90	PE1	ChrY	HPA047113	yes	ENSG00000092345,ENSG00000188120,ENSG00000205916,ENSG00000205944	no		Premeiotic and meiotic grp2	Pachytene spermatocytes,Preleptotene spermatocytes,Spermatogonia	0	0	not set	0	0	0	0	not set	0	0	2	3	cytoplasmic,membrane	6	1	0	0	not set	0	0	3	3	cytoplasmic,membrane	9	1	1	1	cytoplasmic,membrane	1	0	0	0	not set	0	0	3	3	cytoplasmic,membrane
ENSG00000187624	C17orf97	Q6ZQX7	PE1	Chr17	HPA023583	no		no			Leydig cells,Elongated or late spermatids,Pachytene spermatocytes,Round or early spermatids	2	2	cytoplasmic,membrane	4	1	3	3	cytoplasmic,membrane	9	1	3	3	cytoplasmic,membrane	9	1	1	2	cytoplasmic,membrane	2	0	1	1	cytoplasmic,membrane	1	0	3	3	cytoplasmic,membrane	9	1	0	0	not set	0	0	1	1	cytoplasmic,membrane
ENSG00000187690	CXorf67	Q86X51	uPE1	ChrX	HPA006128	no		yes	independent,orthogonal		Pachytene spermatocytes,Preleptotene spermatocytes,Round or early spermatids,Spermatogonia	0	0	not set	0	0	0	0	not set	0	0	3	3	nuclear	9	1	0	0	not set	0	0	3	3	nuclear	9	1	2	3	nuclear	6	1	0	0	not set	0	0	3	3	nuclear
ENSG00000187726	DNAJB13	P59910	PE1	Chr11	HPA052465	no		yes	orthogonal	Meiotic and Postmeiotic grp 4	Elongated or late spermatids,Pachytene spermatocytes,Round or early spermatids	1	3	cytoplasmic,membrane	3	0	3	3	cytoplasmic,membrane	9	1	2	2	cytoplasmic,membrane	4	1	0	0	not set	0	0	0	0	not set	0	0	2	2	cytoplasmic,membrane	4	1	0	0	not set	0	0	0	0	not set
ENSG00000187773	FAM69C	Q0P6D2	uPE1	Chr18	HPA048928	no		yes	orthogonal	Postmeiotic grp 5	Elongated or late spermatids,Round or early spermatids	0	0	not set	0	0	3	3	membrane	9	1	0	0	not set	0	0	0	0	not set	0	0	0	0	not set	0	0	3	3	cytoplasmic,membrane	9	1	0	0	not set	0	0	0	0	not set
ENSG00000187969	ZCCHC13	Q8WW36	uPE1	ChrX	HPA003382	no		yes	orthogonal	Postmeiotic grp 5	Elongated or late spermatids	1	3	cytoplasmic	3	0	3	3	cytoplasmic	9	1	0	0	not set	0	0	0	0	not set	0	0	0	0	not set	0	0	1	2	cytoplasmic	2	0	0	0	not set	0	0	0	0	not set
ENSG00000188120	DAZ1	Q9NQZ3	PE1	ChrY	HPA047113	yes	ENSG00000092345,ENSG00000187191,ENSG00000205916,ENSG00000205944	no		Premeiotic and meiotic grp2	Pachytene spermatocytes,Preleptotene spermatocytes,Spermatogonia	0	0	not set	0	0	0	0	not set	0	0	2	3	cytoplasmic,membrane	6	1	0	0	not set	0	0	3	3	cytoplasmic,membrane	9	1	1	1	cytoplasmic,membrane	1	0	0	0	not set	0	0	3	3	cytoplasmic,membrane
ENSG00000188163	FAM166A	Q6J272	uPE1	Chr9	HPA023307	no		yes	orthogonal		Elongated or late spermatids,Preleptotene spermatocytes,Round or early spermatids,Spermatogonia	1	2	cytoplasmic	2	0	3	3	cytoplasmic,membrane	9	1	1	3	cytoplasmic	3	0	0	0	not set	0	0	2	2	cytoplasmic	4	1	2	3	cytoplasmic	6	1	0	0	not set	0	0	2	2	cytoplasmic
ENSG00000188782	CATSPER4	Q7RTX7	PE1	Chr1	HPA045257	no		yes	orthogonal	Postmeiotic grp 5	Elongated or late spermatids	0	0	not set	0	0	3	3	cytoplasmic,membrane	9	1	0	0	not set	0	0	0	0	not set	0	0	0	0	not set	0	0	0	0	not set	0	0	0	0	not set	0	0	0	0	not set
ENSG00000189064	GAGE2A	Q6NT46	uPE1	ChrX	HPA043232	yes	ENSG00000205777,ENSG00000215269,ENSG00000215274,ENSG00000216649,ENSG00000224659,ENSG00000224902,ENSG00000227488,ENSG00000236362,ENSG00000237671,ENSG00000274274,ENSG00000275113	no		Premeiotic grp 1	Preleptotene spermatocytes,Spermatogonia	0	0	not set	0	0	0	0	not set	0	0	2	1	cytoplasmic,nuclear	2	0	0	0	not set	0	0	3	3	cytoplasmic,nuclear	9	1	0	0	not set	0	0	0	0	not set	0	0	3	3	cytoplasmic,nuclear
ENSG00000189139	FSCB	Q5H9T9	PE1	Chr14	HPA003546	no		no		Meiotic and Postmeiotic grp 4	Elongated or late spermatids,Pachytene spermatocytes,Round or early spermatids	1	0.5	cytoplasmic	0.5	0	3	3	cytoplasmic	9	1	3	3	cytoplasmic	9	1	0	0	not set	0	0	0	0	not set	0	0	3	3	cytoplasmic	9	1	0	0	not set	0	0	0	0	not set
ENSG00000196335	STK31	Q9BXU1	PE1	Chr7	HPA023194	no		yes	orthogonal		Pachytene spermatocytes,Preleptotene spermatocytes,Round or early spermatids,Spermatogonia	1	3	cytoplasmic	3	0	1	3	cytoplasmic	3	0	3	3	cytoplasmic	9	1	0	0	not set	0	0	2	3	cytoplasmic	6	1	3	3	cytoplasmic	9	1	0	0	not set	0	0	2	3	cytoplasmic
ENSG00000196503	ARL9	Q6T311	PE1	Chr4	HPA072942	no		yes	orthogonal	Postmeiotic grp 5	Elongated or late spermatids	1	1	cytoplasmic	1	0	3	3	cytoplasmic,membrane,nuclear	9	1	0	0	not set	0	0	0	0	not set	0	0	0	0	not set	0	0	0	0	not set	0	0	0	0	not set	0	0	0	0	not set
ENSG00000196787	HIST1H2AG	P0C0S8	PE1	Chr6	HPA041189	yes	ENSG00000099284,ENSG00000113648,ENSG00000164508,ENSG00000180573,ENSG00000181218,ENSG00000184260,ENSG00000184270,ENSG00000188486,ENSG00000196747,ENSG00000196866,ENSG00000203812,ENSG00000246705,ENSG00000272196,ENSG00000274997,ENSG00000275221,ENSG00000276368,ENSG00000276903,ENSG00000277075,ENSG00000278463,ENSG00000278677,ENSG00000282988	no			Elongated or late spermatids,Pachytene spermatocytes,Preleptotene spermatocytes,Round or early spermatids,Spermatogonia	0	0	not set	0	0	3	3	nuclear	9	1	3	3	nuclear	9	1	0	0	not set	0	0	3	3	nuclear	9	1	3	3	nuclear	9	1	0	0	not set	0	0	3	3	nuclear
ENSG00000196911	KPNA5	O15131	PE1	Chr6	HPA054037	no		yes	orthogonal	Meiotic and Postmeiotic grp 4	Elongated or late spermatids,Pachytene spermatocytes,Round or early spermatids	1	3	cytoplasmic	3	0	3	3	cytoplasmic,nuclear	9	1	3	2	nuclear	6	1	0	0	not set	0	0	0	0	not set	0	0	3	3	nuclear	9	1	0	0	not set	0	0	0	0	not set
ENSG00000197168	NEK5	Q6P3R8	PE2	Chr13	HPA035565	no		yes	orthogonal	Postmeiotic grp 5	Elongated or late spermatids,Round or early spermatids	1	2	cytoplasmic	2	0	3	2	cytoplasmic,nuclear	6	1	0	0	not set	0	0	0	0	not set	0	0	0	0	not set	0	0	3	2	cytoplasmic,membrane,nuclear	6	1	0	0	not set	0	0	0	0	not set
ENSG00000197183	NOL4L	Q96MY1	uPE1	Chr20	HPA043600	no		yes	independent,orthogonal	Somatic grp 6	Sertoli cells	1	2	nuclear	2	0	0	0	not set	0	0	1	2	nuclear	2	0	0	0	not set	0	0	0	0	not set	0	0	1	2	nuclear	2	0	3	3	nuclear	9	1	0	0	not set
ENSG00000197826	C4orf22	Q6V702	uPE1	Chr4	HPA043383	no		no			Leydig cells,Preleptotene spermatocytes,Spermatogonia	2	3	cytoplasmic,membrane	6	1	1	3	cytoplasmic,membrane	3	0	1	3	cytoplasmic,membrane	3	0	0	0	not set	0	0	3	2	cytoplasmic,membrane	6	1	1	3	cytoplasmic,membrane	3	0	0	0	not set	0	0	3	2	cytoplasmic,membrane
ENSG00000198003	CCDC151	A5D8V7	PE1	Chr19	HPA054626	no		yes	orthogonal	Premeiotic grp 1	Preleptotene spermatocytes	0	0	not set	0	0	0	0	not set	0	0	0	0	not set	0	0	0	0	not set	0	0	2	2	cytoplasmic,membrane	4	1	0	0	not set	0	0	0	0	not set	0	0	1	1	cytoplasmic,membrane
ENSG00000198354	DCAF12L2	Q5VW00	uPE1	ChrX	HPA044737	yes	ENSG00000198889	no		Postmeiotic grp 5	Elongated or late spermatids,Round or early spermatids	1	2	cytoplasmic	2	0	3	3	cytoplasmic	9	1	1	2	cytoplasmic	2	0	0	0	not set	0	0	1	2	cytoplasmic	2	0	2	3	cytoplasmic	6	1	0	0	not set	0	0	1	2	cytoplasmic
ENSG00000198765	SYCP1	Q15431	PE1	Chr1	HPA021083	no		yes	orthogonal	Premeiotic grp 1	Spermatogonia	1	0.5	cytoplasmic	0.5	0	0	0	not set	0	0	0	0	not set	0	0	0	0	not set	0	0	1	3	cytoplasmic	3	0	0	0	not set	0	0	0	0	not set	0	0	2	3	cytoplasmic
ENSG00000198780	FAM169A	Q9Y6X4	uPE1	Chr5	HPA041574	no		yes	orthogonal	Somatic grp 6	Sertoli cells	0	0	not set	0	0	2	1	cytoplasmic,membrane	2	0	1	1	membrane	1	0	0	0	not set	0	0	0	0	not set	0	0	1	1	membrane	1	0	3	3	nuclear	9	1	1	2	membrane
ENSG00000198798	MAGEB3	O15480	uPE1	ChrX	HPA072203	no		no			Pachytene spermatocytes,Preleptotene spermatocytes,Round or early spermatids,Spermatogonia	1	2	cytoplasmic,nuclear	2	0	1	1	cytoplasmic,membrane	1	0	3	3	nuclear	9	1	0	0	not set	0	0	2	3	nuclear	6	1	3	3	nuclear	9	1	0	0	not set	0	0	2	3	nuclear
ENSG00000198883	PNMA5	Q96PV4	PE1	ChrX	HPA044690	no		yes	orthogonal	Premeiotic and meiotic grp2	Pachytene spermatocytes,Preleptotene spermatocytes,Spermatogonia	0	0	not set	0	0	0	0	not set	0	0	3	2	nuclear	6	1	0	0	not set	0	0	3	3	nuclear	9	1	0	0	not set	0	0	0	0	not set	0	0	2	2	nuclear
ENSG00000198889	DCAF12L1	Q5VU92	uPE1	ChrX	HPA044737	yes	ENSG00000198354	no		Postmeiotic grp 5	Elongated or late spermatids,Round or early spermatids	1	2	cytoplasmic	2	0	3	3	cytoplasmic	9	1	1	2	cytoplasmic	2	0	0	0	not set	0	0	1	2	cytoplasmic	2	0	2	3	cytoplasmic	6	1	0	0	not set	0	0	1	2	cytoplasmic
ENSG00000203784	LELP1	Q5T871	PE1	Chr1	HPA070231	no		yes	orthogonal	Postmeiotic grp 5	Elongated or late spermatids	0	0	not set	0	0	3	3	cytoplasmic	9	1	0	0	not set	0	0	0	0	not set	0	0	0	0	not set	0	0	0	0	not set	0	0	0	0	not set	0	0	0	0	not set
ENSG00000203943	SAMD13	Q5VXD3	uPE1	Chr1	HPA058929	no		yes	orthogonal		Leydig cells,Elongated or late spermatids,Pachytene spermatocytes,Preleptotene spermatocytes,Spermatogonia	2	2	cytoplasmic,membrane	4	1	2	2	cytoplasmic,membrane	4	1	2	3	cytoplasmic,membrane	6	1	0	0	not set	0	0	2	3	cytoplasmic,membrane	6	1	1	1	cytoplasmic,membrane	1	0	0	0	not set	0	0	2	3	cytoplasmic,membrane
ENSG00000203989	RHOXF2B	P0C7M4	PE1	ChrX	HPA003314	yes	ENSG00000131721	no		Premeiotic and meiotic grp2	Pachytene spermatocytes,Preleptotene spermatocytes,Spermatogonia	0	0	not set	0	0	0	0	not set	0	0	2	2	cytoplasmic	4	1	0	0	not set	0	0	2	3	nuclear	6	1	0	0	not set	0	0	0	0	not set	0	0	3	3	nuclear
ENSG00000204052	LRRC73	Q5JTD7	uPE1	Chr6	HPA046698	no		yes	orthogonal	Postmeiotic grp 5	Round or early spermatids	0	0	not set	0	0	1	2	cytoplasmic,membrane	2	0	1	1	nuclear	1	0	0	0	not set	0	0	0	0	not set	0	0	2	3	nuclear	6	1	0	0	not set	0	0	0	0	not set
ENSG00000204065	TCEAL5	Q5H9L2	PE1	ChrX	HPA058982	yes	ENSG00000196507,ENSG00000204071	no		Postmeiotic grp 5	Elongated or late spermatids,Round or early spermatids	0	0	not set	0	0	3	2	cytoplasmic	6	1	0	0	not set	0	0	0	0	not set	0	0	0	0	not set	0	0	3	2	cytoplasmic,membrane	6	1	0	0	not set	0	0	0	0	not set
ENSG00000204071	TCEAL6	Q6IPX3	PE1	ChrX	HPA058982	yes	ENSG00000196507,ENSG00000204065	no		Postmeiotic grp 5	Elongated or late spermatids,Round or early spermatids	0	0	not set	0	0	3	2	cytoplasmic	6	1	0	0	not set	0	0	0	0	not set	0	0	0	0	not set	0	0	3	2	cytoplasmic,membrane	6	1	0	0	not set	0	0	0	0	not set
ENSG00000204390	HSPA1L	P34931	PE1	Chr6	HPA052504	yes	ENSG00000109971,ENSG00000126803,ENSG00000173110,ENSG00000204388,ENSG00000204389	yes	orthogonal	Meiotic and Postmeiotic grp 4	Elongated or late spermatids,Pachytene spermatocytes,Round or early spermatids	0	0	not set	0	0	3	3	cytoplasmic,membrane,nuclear	9	1	3	3	cytoplasmic,membrane,nuclear	9	1	0	0	not set	0	0	2	1	cytoplasmic,membrane,nuclear	2	0	3	3	cytoplasmic,membrane,nuclear	9	1	0	0	not set	0	0	2	1	cytoplasmic,membrane
ENSG00000204427	ABHD16A	O95870	PE1	Chr6	HPA058606	no		no		Meiotic and Postmeiotic grp 4	Elongated or late spermatids,Pachytene spermatocytes,Round or early spermatids	1	2	cytoplasmic,membrane	2	0	2	3	cytoplasmic,membrane	6	1	2	3	cytoplasmic,membrane	6	1	0	0	not set	0	0	0	0	not set	0	0	2	3	cytoplasmic,membrane	6	1	0	0	not set	0	0	0	0	not set
ENSG00000204815	TTC25	Q96NG3	PE1	Chr17	HPA023908	no		yes	orthogonal	Postmeiotic grp 5	Elongated or late spermatids,Round or early spermatids	0	0	not set	0	0	2	2	cytoplasmic,membrane	4	1	1	1	cytoplasmic,membrane	1	0	0	0	not set	0	0	0	0	not set	0	0	2	3	cytoplasmic,membrane	6	1	0	0	not set	0	0	0	0	not set
ENSG00000204856	FAM216A	Q8WUB2	uPE1	Chr12	HPA038286	no		yes	orthogonal		Elongated or late spermatids,Round or early spermatids,Sertoli cells	0	0	not set	0	0	3	3	cytoplasmic,membrane	9	1	0	0	not set	0	0	0	0	not set	0	0	0	0	not set	0	0	3	3	cytoplasmic,membrane	9	1	3	3	cytoplasmic,membrane	9	1	0	0	not set
ENSG00000205085	FAM71F2	Q6NXP2	PE2	Chr7	HPA024248	no		yes	orthogonal	Somatic grp 6	Leydig cells,Sertoli cells	3	3	cytoplasmic	9	1	0	0	not set	0	0	0	0	not set	0	0	0	0	not set	0	0	0	0	not set	0	0	0	0	not set	0	0	3	3	cytoplasmic,nuclear	9	1	0	0	not set
ENSG00000205238	SPDYE2	Q495Y8	PE1	Chr7	HPA051750	yes	ENSG00000136206,ENSG00000170092,ENSG00000173678,ENSG00000183318,ENSG00000185040,ENSG00000214300,ENSG00000260097	no		Postmeiotic grp 5	Elongated or late spermatids	0	0	not set	0	0	3	3	nuclear	9	1	0	0	not set	0	0	0	0	not set	0	0	0	0	not set	0	0	3	1	cytoplasmic,nuclear	3	0	0	0	not set	0	0	0	0	not set
ENSG00000205359	SLCO6A1	Q86UG4	PE1	Chr5	HPA054126	no		yes	orthogonal		Elongated or late spermatids,Round or early spermatids,Sertoli cells	1	3	cytoplasmic	3	0	2	2	cytoplasmic,membrane	4	1	0	0	not set	0	0	0	0	not set	0	0	0	0	not set	0	0	3	3	membrane	9	1	3	2	membrane	6	1	0	0	not set
ENSG00000205642	VCX3B	Q9H321	PE2	ChrX	HPA049357	yes	ENSG00000129862,ENSG00000129864,ENSG00000169059,ENSG00000177504,ENSG00000182583	no			Elongated or late spermatids,Pachytene spermatocytes,Preleptotene spermatocytes,Round or early spermatids,Spermatogonia	0	0	not set	0	0	2	3	cytoplasmic,nuclear	6	1	3	3	nuclear	9	1	0	0	not set	0	0	3	3	nuclear	9	1	3	3	nuclear	9	1	0	0	not set	0	0	3	3	nuclear
ENSG00000205777	GAGE1	Q13068	PE1	ChrX	HPA043232	yes	ENSG00000189064,ENSG00000215269,ENSG00000215274,ENSG00000216649,ENSG00000224659,ENSG00000224902,ENSG00000227488,ENSG00000236362,ENSG00000237671,ENSG00000274274,ENSG00000275113	no		Premeiotic grp 1	Preleptotene spermatocytes,Spermatogonia	0	0	not set	0	0	0	0	not set	0	0	2	1	cytoplasmic,nuclear	2	0	0	0	not set	0	0	3	3	cytoplasmic,nuclear	9	1	0	0	not set	0	0	0	0	not set	0	0	3	3	cytoplasmic,nuclear
ENSG00000205838	TTC23L	Q6PF05	PE1	Chr5	HPA037807	no		yes	orthogonal	Meiotic and Postmeiotic grp 4	Pachytene spermatocytes,Round or early spermatids	1	3	cytoplasmic	3	0	1	2	cytoplasmic	2	0	3	3	nuclear	9	1	0	0	not set	0	0	1	3	nuclear	3	0	2	3	nuclear	6	1	0	0	not set	0	0	1	3	nuclear
ENSG00000205856	C22orf42	Q6IC83	PE2	Chr22	HPA019531	no		yes	orthogonal		Leydig cells,Spermatogonia	3	3	cytoplasmic	9	1	0	0	not set	0	0	0	0	not set	0	0	0	0	not set	0	0	1	2	cytoplasmic	2	0	0	0	not set	0	0	0	0	not set	0	0	2	3	cytoplasmic,membrane
ENSG00000205916	DAZ4	Q86SG3	PE1	ChrY	HPA047113	yes	ENSG00000092345,ENSG00000187191,ENSG00000188120,ENSG00000205944	no		Premeiotic and meiotic grp2	Pachytene spermatocytes,Preleptotene spermatocytes,Spermatogonia	0	0	not set	0	0	0	0	not set	0	0	2	3	cytoplasmic,membrane	6	1	0	0	not set	0	0	3	3	cytoplasmic,membrane	9	1	1	1	cytoplasmic,membrane	1	0	0	0	not set	0	0	3	3	cytoplasmic,membrane
ENSG00000205944	DAZ2	Q13117	PE1	ChrY	HPA047113	yes	ENSG00000092345,ENSG00000187191,ENSG00000188120,ENSG00000205916	no		Premeiotic and meiotic grp2	Pachytene spermatocytes,Preleptotene spermatocytes,Spermatogonia	0	0	not set	0	0	0	0	not set	0	0	2	3	cytoplasmic,membrane	6	1	0	0	not set	0	0	3	3	cytoplasmic,membrane	9	1	1	1	cytoplasmic,membrane	1	0	0	0	not set	0	0	3	3	cytoplasmic,membrane
ENSG00000206026	SMIM21	Q3B7S5	PE4	Chr18	HPA041686	no		yes	orthogonal	Somatic grp 6	Leydig cells	3	3	cytoplasmic,nuclear	9	1	0	0	not set	0	0	0	0	not set	0	0	0	0	not set	0	0	0	0	not set	0	0	0	0	not set	0	0	0	0	not set	0	0	0	0	not set
ENSG00000212122	TSSK1B	Q9BXA7	PE1	Chr5	HPA027827	no		yes	orthogonal	Postmeiotic grp 5	Elongated or late spermatids	0	0	not set	0	0	3	3	cytoplasmic	9	1	0	0	not set	0	0	0	0	not set	0	0	0	0	not set	0	0	1	3	cytoplasmic	3	0	0	0	not set	0	0	0	0	not set
ENSG00000212123	PRR22	Q8IZ63	uPE1	Chr19	HPA044157	no		yes	orthogonal	Postmeiotic grp 5	Round or early spermatids	0	0	not set	0	0	0	0	not set	0	0	0	0	not set	0	0	0	0	not set	0	0	0	0	not set	0	0	3	3	nuclear	9	1	0	0	not set	0	0	0	0	not set
ENSG00000213085	CFAP45	Q9UL16	uPE1	Chr1	HPA043618	no		yes	orthogonal	Postmeiotic grp 5	Elongated or late spermatids	0	0	not set	0	0	2	2	cytoplasmic,membrane	4	1	0	0	not set	0	0	0	0	not set	0	0	0	0	not set	0	0	0	0	not set	0	0	0	0	not set	0	0	0	0	not set
ENSG00000213714	FAM209B	Q5JX69	uPE1	Chr20	HPA042144	no		yes	orthogonal	Postmeiotic grp 5	Elongated or late spermatids,Round or early spermatids	2	1	cytoplasmic	2	0	3	3	membrane,nuclear	9	1	1	3	cytoplasmic,membrane	3	0	0	0	not set	0	0	1	3	cytoplasmic,membrane	3	0	3	3	membrane,nuclear	9	1	0	0	not set	0	0	0	0	not set
ENSG00000214300	SPDYE3	A6NKU9	PE2	Chr7	HPA051750	yes	ENSG00000136206,ENSG00000170092,ENSG00000173678,ENSG00000183318,ENSG00000185040,ENSG00000205238,ENSG00000260097	no		Postmeiotic grp 5	Elongated or late spermatids	0	0	not set	0	0	3	3	nuclear	9	1	0	0	not set	0	0	0	0	not set	0	0	0	0	not set	0	0	3	1	cytoplasmic,nuclear	3	0	0	0	not set	0	0	0	0	not set
ENSG00000215029	TCP11X2	Q5H9J9	PE3	ChrX	HPA048311	yes	ENSG00000124678	no		Postmeiotic grp 5	Elongated or late spermatids,Round or early spermatids	0	0	not set	0	0	3	3	cytoplasmic	9	1	0	0	not set	0	0	0	0	not set	0	0	0	0	not set	0	0	2	3	cytoplasmic	6	1	0	0	not set	0	0	0	0	not set
ENSG00000215186	GOLGA6B	A6NDN3	PE3	Chr15	HPA044978	yes	ENSG00000140478,ENSG00000159289,ENSG00000167195	no			Elongated or late spermatids,Round or early spermatids,Spermatogonia	1	1	cytoplasmic	1	0	3	3	cytoplasmic,membrane,nuclear	9	1	0	0	not set	0	0	0	0	not set	0	0	0	0	not set	0	0	3	3	cytoplasmic	9	1	0	0	not set	0	0	3	2	nuclear
ENSG00000215274	GAGE10	A6NGK3	uPE1	ChrX	HPA043232	yes	ENSG00000189064,ENSG00000205777,ENSG00000215269,ENSG00000216649,ENSG00000224659,ENSG00000224902,ENSG00000227488,ENSG00000236362,ENSG00000237671,ENSG00000274274,ENSG00000275113	no		Premeiotic grp 1	Preleptotene spermatocytes,Spermatogonia	0	0	not set	0	0	0	0	not set	0	0	2	1	cytoplasmic,nuclear	2	0	0	0	not set	0	0	3	3	cytoplasmic,nuclear	9	1	0	0	not set	0	0	0	0	not set	0	0	3	3	cytoplasmic,nuclear
ENSG00000216649	GAGE12E	A1L429	uPE1	ChrX	HPA043232	yes	ENSG00000189064,ENSG00000205777,ENSG00000215269,ENSG00000215274,ENSG00000224659,ENSG00000224902,ENSG00000227488,ENSG00000236362,ENSG00000237671,ENSG00000274274,ENSG00000275113	no		Premeiotic grp 1	Preleptotene spermatocytes,Spermatogonia	0	0	not set	0	0	0	0	not set	0	0	2	1	cytoplasmic,nuclear	2	0	0	0	not set	0	0	3	3	cytoplasmic,nuclear	9	1	0	0	not set	0	0	0	0	not set	0	0	3	3	cytoplasmic,nuclear
ENSG00000221900	POM121L12	Q8N7R1	PE1	Chr7	HPA027836	no		yes	orthogonal	Meiotic and Postmeiotic grp 4	Elongated or late spermatids,Pachytene spermatocytes,Round or early spermatids	1	2	cytoplasmic,nuclear	2	0	3	3	cytoplasmic,membrane,nuclear	9	1	3	3	cytoplasmic,membrane,nuclear	9	1	1	1	cytoplasmic,nuclear	1	0	1	1	cytoplasmic,membrane,nuclear	1	0	3	3	cytoplasmic,membrane	9	1	0	0	not set	0	0	0	0	not set
ENSG00000224659	GAGE12J	A6NER3	uPE1	ChrX	HPA043232	yes	ENSG00000189064,ENSG00000205777,ENSG00000215269,ENSG00000215274,ENSG00000216649,ENSG00000224902,ENSG00000227488,ENSG00000236362,ENSG00000237671,ENSG00000274274,ENSG00000275113	no		Premeiotic grp 1	Preleptotene spermatocytes,Spermatogonia	0	0	not set	0	0	0	0	not set	0	0	2	1	cytoplasmic,nuclear	2	0	0	0	not set	0	0	3	3	cytoplasmic,nuclear	9	1	0	0	not set	0	0	0	0	not set	0	0	3	3	cytoplasmic,nuclear
ENSG00000224902	GAGE12H	A6NDE8	PE2	ChrX	HPA043232	yes	ENSG00000189064,ENSG00000205777,ENSG00000215269,ENSG00000215274,ENSG00000216649,ENSG00000224659,ENSG00000227488,ENSG00000236362,ENSG00000237671,ENSG00000274274,ENSG00000275113	no		Premeiotic grp 1	Preleptotene spermatocytes,Spermatogonia	0	0	not set	0	0	0	0	not set	0	0	2	1	cytoplasmic,nuclear	2	0	0	0	not set	0	0	3	3	cytoplasmic,nuclear	9	1	0	0	not set	0	0	0	0	not set	0	0	3	3	cytoplasmic,nuclear
ENSG00000226941	RBMY1J	Q15415	PE1	ChrY	HPA001534	yes	ENSG00000169800,ENSG00000234414,ENSG00000242389,ENSG00000242875,ENSG00000244395	no			Pachytene spermatocytes,Preleptotene spermatocytes,Round or early spermatids,Spermatogonia	0	0	not set	0	0	0	0	not set	0	0	3	3	nuclear	9	1	0	0	not set	0	0	3	3	nuclear	9	1	3	3	nuclear	9	1	0	0	not set	0	0	3	3	nuclear
ENSG00000227488	GAGE12D	A1L429	uPE1	ChrX	HPA043232	yes	ENSG00000189064,ENSG00000205777,ENSG00000215269,ENSG00000215274,ENSG00000216649,ENSG00000224659,ENSG00000224902,ENSG00000236362,ENSG00000237671,ENSG00000274274,ENSG00000275113	no		Premeiotic grp 1	Preleptotene spermatocytes,Spermatogonia	0	0	not set	0	0	0	0	not set	0	0	2	1	cytoplasmic,nuclear	2	0	0	0	not set	0	0	3	3	cytoplasmic,nuclear	9	1	0	0	not set	0	0	0	0	not set	0	0	3	3	cytoplasmic,nuclear
ENSG00000228836	CT45A5	P0DMU8	PE2	ChrX	HPA044735	yes	ENSG00000268940,ENSG00000269096,ENSG00000269586,ENSG00000270946,ENSG00000271449,ENSG00000273696,ENSG00000278085,ENSG00000278289	no		Premeiotic and meiotic grp2	Pachytene spermatocytes,Preleptotene spermatocytes,Spermatogonia	0	0	not set	0	0	0	0	not set	0	0	3	3	nuclear	9	1	0	0	not set	0	0	2	3	nuclear	6	1	0	0	not set	0	0	0	0	not set	0	0	3	3	nuclear
ENSG00000228927	TSPY3	P0CV98	PE3	ChrY	HPA049384	yes	ENSG00000168757,ENSG00000229549,ENSG00000233803,ENSG00000236424,ENSG00000258992	no		Premeiotic grp 1	Preleptotene spermatocytes,Spermatogonia	0	0	not set	0	0	0	0	not set	0	0	0	0	not set	0	0	0	0	not set	0	0	3	3	cytoplasmic	9	1	0	0	not set	0	0	0	0	not set	0	0	3	3	cytoplasmic
ENSG00000229549	TSPY8	P0CW00	PE3	ChrY	HPA049384	yes	ENSG00000168757,ENSG00000228927,ENSG00000233803,ENSG00000236424,ENSG00000258992	no		Premeiotic grp 1	Preleptotene spermatocytes,Spermatogonia	0	0	not set	0	0	0	0	not set	0	0	0	0	not set	0	0	0	0	not set	0	0	3	3	cytoplasmic	9	1	0	0	not set	0	0	0	0	not set	0	0	3	3	cytoplasmic
ENSG00000230797	YY2	O15391	PE1	ChrX	HPA001119	yes	ENSG00000100811	no			Pachytene spermatocytes,Peritubular cells,Sertoli cells	2	1	nuclear	2	0	0	0	not set	0	0	2	3	nuclear	6	1	3	2	nuclear	6	1	1	1	nuclear	1	0	1	0.5	nuclear	0.5	0	3	3	nuclear	9	1	0	0	not set
ENSG00000233803	TSPY4	P0CV99,P0CW01	PE2	ChrY	HPA049384	yes	ENSG00000168757,ENSG00000228927,ENSG00000229549,ENSG00000236424,ENSG00000258992	no		Premeiotic grp 1	Preleptotene spermatocytes,Spermatogonia	0	0	not set	0	0	0	0	not set	0	0	0	0	not set	0	0	0	0	not set	0	0	3	3	cytoplasmic	9	1	0	0	not set	0	0	0	0	not set	0	0	3	3	cytoplasmic
ENSG00000234414	RBMY1A1	P0DJD3	PE1	ChrY	HPA001534	yes	ENSG00000169800,ENSG00000226941,ENSG00000242389,ENSG00000242875,ENSG00000244395	no			Pachytene spermatocytes,Preleptotene spermatocytes,Round or early spermatids,Spermatogonia	0	0	not set	0	0	0	0	not set	0	0	3	3	nuclear	9	1	0	0	not set	0	0	3	3	nuclear	9	1	3	3	nuclear	9	1	0	0	not set	0	0	3	3	nuclear
ENSG00000234719	NPIPB2	A6NJ64	PE5	Chr16	HPA053611	yes	ENSG00000169203,ENSG00000169246,ENSG00000183426,ENSG00000183793,ENSG00000183889,ENSG00000185864,ENSG00000196436,ENSG00000196993,ENSG00000198064,ENSG00000198156,ENSG00000214940,ENSG00000214967,ENSG00000224712,ENSG00000233024,ENSG00000233232,ENSG00000243716,ENSG00000254206,ENSG00000254852,ENSG00000255524,ENSG00000261832	no			Leydig cells,Elongated or late spermatids,Pachytene spermatocytes,Preleptotene spermatocytes,Round or early spermatids,Sertoli cells,Spermatogonia	2	3	nuclear	6	1	2	2	cytoplasmic,membrane	4	1	3	3	nuclear	9	1	1	2	nuclear	2	0	2	3	nuclear	6	1	3	3	nuclear	9	1	3	3	nuclear	9	1	3	3	nuclear
ENSG00000235034	C19orf81	C9J6K1	uPE1	Chr19	HPA060238	no		yes	orthogonal		Elongated or late spermatids,Preleptotene spermatocytes,Spermatogonia	1	3	cytoplasmic	3	0	3	3	cytoplasmic	9	1	1	3	cytoplasmic	3	0	0	0	not set	0	0	2	3	cytoplasmic,membrane,nuclear	6	1	1	3	cytoplasmic	3	0	0	0	not set	0	0	3	3	cytoplasmic,membrane,nuclear
ENSG00000235169	SMIM1	B2RUZ4	PE1	Chr1	HPA069088	no		no		Meiotic and Postmeiotic grp 4	Elongated or late spermatids,Pachytene spermatocytes,Round or early spermatids	1	3	cytoplasmic,membrane	3	0	3	3	cytoplasmic,membrane	9	1	3	3	cytoplasmic,membrane	9	1	0	0	not set	0	0	1	2	cytoplasmic,membrane	2	0	3	3	cytoplasmic,membrane	9	1	0	0	not set	0	0	1	1	cytoplasmic,membrane
ENSG00000236362	GAGE12F	O76087,P0CL80,P0CL82	PE3	ChrX	HPA043232	yes	ENSG00000189064,ENSG00000205777,ENSG00000215269,ENSG00000215274,ENSG00000216649,ENSG00000224659,ENSG00000224902,ENSG00000227488,ENSG00000237671,ENSG00000274274,ENSG00000275113	no		Premeiotic grp 1	Preleptotene spermatocytes,Spermatogonia	0	0	not set	0	0	0	0	not set	0	0	2	1	cytoplasmic,nuclear	2	0	0	0	not set	0	0	3	3	cytoplasmic,nuclear	9	1	0	0	not set	0	0	0	0	not set	0	0	3	3	cytoplasmic,nuclear
ENSG00000236424	TSPY10		PE3	ChrY	HPA049384	yes	ENSG00000168757,ENSG00000228927,ENSG00000229549,ENSG00000233803,ENSG00000258992	no		Premeiotic grp 1	Preleptotene spermatocytes,Spermatogonia	0	0	not set	0	0	0	0	not set	0	0	0	0	not set	0	0	0	0	not set	0	0	3	3	cytoplasmic	9	1	0	0	not set	0	0	0	0	not set	0	0	3	3	cytoplasmic
ENSG00000237671	GAGE12C	A1L429	uPE1	ChrX	HPA043232	yes	ENSG00000189064,ENSG00000205777,ENSG00000215269,ENSG00000215274,ENSG00000216649,ENSG00000224659,ENSG00000224902,ENSG00000227488,ENSG00000236362,ENSG00000274274,ENSG00000275113	no		Premeiotic grp 1	Preleptotene spermatocytes,Spermatogonia	0	0	not set	0	0	0	0	not set	0	0	2	1	cytoplasmic,nuclear	2	0	0	0	not set	0	0	3	3	cytoplasmic,nuclear	9	1	0	0	not set	0	0	0	0	not set	0	0	3	3	cytoplasmic,nuclear
ENSG00000238083	LRRC37A2	A6NM11	uPE1	Chr17	HPA042121	yes	ENSG00000176681,ENSG00000176809	no		Postmeiotic grp 5	Elongated or late spermatids,Round or early spermatids	0	0	not set	0	0	3	3	nuclear	9	1	0	0	not set	0	0	0	0	not set	0	0	0	0	not set	0	0	3	3	cytoplasmic,membrane,nuclear	9	1	0	0	not set	0	0	0	0	not set
ENSG00000239605	STPG4	Q8N801	PE1	Chr2	HPA052691	yes	ENSG00000273269	no			Sertoli cells,Spermatogonia	0	0	not set	0	0	0	0	not set	0	0	0	0	not set	0	0	0	0	not set	0	0	0	0	not set	0	0	0	0	not set	0	0	2	3	cytoplasmic	6	1	2	3	cytoplasmic
ENSG00000241476	SSX2	Q16385	PE1	ChrX	HPA045683	yes	ENSG00000126752,ENSG00000165583,ENSG00000165584,ENSG00000187754,ENSG00000268009,ENSG00000268447,ENSG00000269791	no		Premeiotic grp 1	Preleptotene spermatocytes,Spermatogonia	0	0	not set	0	0	0	0	not set	0	0	1	2	nuclear	2	0	0	0	not set	0	0	2	3	nuclear	6	1	0	0	not set	0	0	0	0	not set	0	0	3	3	nuclear
ENSG00000242389	RBMY1E	A6NEQ0	PE2	ChrY	HPA001534	yes	ENSG00000169800,ENSG00000226941,ENSG00000234414,ENSG00000242875,ENSG00000244395	no			Pachytene spermatocytes,Preleptotene spermatocytes,Round or early spermatids,Spermatogonia	0	0	not set	0	0	0	0	not set	0	0	3	3	nuclear	9	1	0	0	not set	0	0	3	3	nuclear	9	1	3	3	nuclear	9	1	0	0	not set	0	0	3	3	nuclear
ENSG00000242875	RBMY1B	A6NDE4	PE2	ChrY	HPA001534	yes	ENSG00000169800,ENSG00000226941,ENSG00000234414,ENSG00000242389,ENSG00000244395	no			Pachytene spermatocytes,Preleptotene spermatocytes,Round or early spermatids,Spermatogonia	0	0	not set	0	0	0	0	not set	0	0	3	3	nuclear	9	1	0	0	not set	0	0	3	3	nuclear	9	1	3	3	nuclear	9	1	0	0	not set	0	0	3	3	nuclear
ENSG00000243710	CFAP57	Q96MR6	PE1	Chr1	HPA002736	no		yes	independent,orthogonal	Postmeiotic grp 5	Round or early spermatids	1	1	nuclear	1	0	1	1	cytoplasmic,membrane	1	0	1	1	cytoplasmic,membrane	1	0	0	0	not set	0	0	1	1	not set	1	0	2	3	cytoplasmic,membrane	6	1	0	0	not set	0	0	0	0	not set
ENSG00000243978	RTL9	Q8NET4	uPE1	ChrX	HPA001242	no		yes	orthogonal	Somatic grp 6	Leydig cells,Sertoli cells	2	2	cytoplasmic,membrane,nuclear	4	1	0	0	not set	0	0	0	0	not set	0	0	0	0	not set	0	0	1	1	nuclear	1	0	0	0	not set	0	0	3	3	nuclear	9	1	1	1	nuclear
ENSG00000244588	RAD21L1	Q9H4I0	PE1	Chr20	HPA053282	no		no			Leydig cells,Elongated or late spermatids,Pachytene spermatocytes,Preleptotene spermatocytes,Round or early spermatids,Spermatogonia	2	2	cytoplasmic,membrane,nuclear	4	1	2	2	cytoplasmic,membrane	4	1	2	3	nuclear	6	1	0	0	not set	0	0	3	3	nuclear	9	1	3	3	nuclear	9	1	0	0	not set	0	0	3	3	nuclear
ENSG00000248099	INSL3	P51460	PE1	Chr19	HPA028615	no		yes	orthogonal	Somatic grp 6	Leydig cells	3	3	cytoplasmic	9	1	0	0	not set	0	0	0	0	not set	0	0	1	0.5	cytoplasmic	0.5	0	0	0	not set	0	0	0	0	not set	0	0	0	0	not set	0	0	0	0	not set
ENSG00000249481	SPATS1	Q496A3	uPE1	Chr6	HPA049722	no		no			Elongated or late spermatids,Pachytene spermatocytes,Preleptotene spermatocytes,Round or early spermatids,Spermatogonia	1	3	cytoplasmic,nuclear	3	0	3	2	cytoplasmic,membrane	6	1	2	2	cytoplasmic,membrane,nuclear	4	1	0	0	not set	0	0	3	3	cytoplasmic,membrane,nuclear	9	1	2	3	cytoplasmic,membrane,nuclear	6	1	0	0	not set	0	0	2	2	cytoplasmic,membrane,nuclear
ENSG00000250423	KIAA1210	Q9ULL0	uPE1	ChrX	HPA048322	no		yes	orthogonal		Elongated or late spermatids,Pachytene spermatocytes,Round or early spermatids,Sertoli cells	0	0	not set	0	0	3	3	cytoplasmic,membrane	9	1	3	3	cytoplasmic,membrane	9	1	0	0	not set	0	0	1	2	cytoplasmic,membrane	2	0	3	3	cytoplasmic,membrane	9	1	3	3	cytoplasmic,membrane	9	1	0	0	not set
ENSG00000254636	ARMS2	P0C7Q2	PE1	Chr10	HPA067225	no		yes	orthogonal	Postmeiotic grp 5	Elongated or late spermatids	0	0	not set	0	0	3	2	cytoplasmic,membrane,nuclear	6	1	0	0	not set	0	0	0	0	not set	0	0	0	0	not set	0	0	0	0	not set	0	0	0	0	not set	0	0	0	0	not set
ENSG00000254852	NPIPA2	E9PIF3	PE3	Chr16	HPA053611	yes	ENSG00000169203,ENSG00000169246,ENSG00000183426,ENSG00000183793,ENSG00000183889,ENSG00000185864,ENSG00000196436,ENSG00000196993,ENSG00000198064,ENSG00000198156,ENSG00000214940,ENSG00000214967,ENSG00000224712,ENSG00000233024,ENSG00000233232,ENSG00000234719,ENSG00000243716,ENSG00000254206,ENSG00000255524,ENSG00000261832	no			Leydig cells,Elongated or late spermatids,Pachytene spermatocytes,Preleptotene spermatocytes,Round or early spermatids,Sertoli cells,Spermatogonia	2	3	nuclear	6	1	2	2	cytoplasmic,membrane	4	1	3	3	nuclear	9	1	1	2	nuclear	2	0	2	3	nuclear	6	1	3	3	nuclear	9	1	3	3	nuclear	9	1	3	3	nuclear
ENSG00000258484	SPESP1	Q6UW49	PE1	Chr15	HPA045936	no		yes	independent,orthogonal	Postmeiotic grp 5	Elongated or late spermatids,Round or early spermatids	0	0	not set	0	0	3	3	cytoplasmic,membrane	9	1	0	0	not set	0	0	0	0	not set	0	0	0	0	not set	0	0	3	3	cytoplasmic,membrane	9	1	0	0	not set	0	0	0	0	not set
ENSG00000258644	SYNJ2BP-COX16		#N/A	Chr14	HPA000866	yes	ENSG00000133983,ENSG00000213463	no		Meiotic and Postmeiotic grp 4	Elongated or late spermatids,Pachytene spermatocytes,Round or early spermatids	1	2	cytoplasmic,membrane	2	0	3	3	cytoplasmic,membrane	9	1	3	3	cytoplasmic,membrane	9	1	0	0	not set	0	0	1	1	cytoplasmic,membrane	1	0	3	3	cytoplasmic,membrane	9	1	0	0	not set	0	0	2	1	cytoplasmic,membrane
ENSG00000258992	TSPY1	Q01534	PE1	ChrY	HPA049384	yes	ENSG00000168757,ENSG00000228927,ENSG00000229549,ENSG00000233803,ENSG00000236424	no		Premeiotic grp 1	Preleptotene spermatocytes,Spermatogonia	0	0	not set	0	0	0	0	not set	0	0	0	0	not set	0	0	0	0	not set	0	0	3	3	cytoplasmic	9	1	0	0	not set	0	0	0	0	not set	0	0	3	3	cytoplasmic
ENSG00000260097	SPDYE6		PE3	Chr7	HPA051750	yes	ENSG00000136206,ENSG00000170092,ENSG00000173678,ENSG00000183318,ENSG00000185040,ENSG00000205238,ENSG00000214300	no		Postmeiotic grp 5	Elongated or late spermatids	0	0	not set	0	0	3	3	nuclear	9	1	0	0	not set	0	0	0	0	not set	0	0	0	0	not set	0	0	3	1	cytoplasmic,nuclear	3	0	0	0	not set	0	0	0	0	not set
ENSG00000260287	TBC1D3G	Q6DHY5	PE1	Chr17	HPA047745	yes	ENSG00000129204,ENSG00000273513,ENSG00000274226,ENSG00000274419,ENSG00000274512,ENSG00000274611,ENSG00000274808,ENSG00000274933,ENSG00000275954,ENSG00000278299,ENSG00000278599	no		Postmeiotic grp 5	Elongated or late spermatids,Round or early spermatids	0	0	not set	0	0	3	3	cytoplasmic,membrane	9	1	0	0	not set	0	0	0	0	not set	0	0	0	0	not set	0	0	3	3	cytoplasmic,membrane	9	1	2	1	nuclear	2	0	0	0	not set
ENSG00000260456	C16orf95	Q9H693	uPE1	Chr16	HPA040850	yes	ENSG00000131152	no		Meiotic and Postmeiotic grp 4	Pachytene spermatocytes,Round or early spermatids	1	3	cytoplasmic	3	0	0	0	not set	0	0	2	3	cytoplasmic	6	1	0	0	not set	0	0	1	3	nuclear	3	0	3	3	nuclear	9	1	0	0	not set	0	0	0	0	not set
ENSG00000268009	SSX4	O60224	PE1	ChrX	HPA045683	yes	ENSG00000126752,ENSG00000165583,ENSG00000165584,ENSG00000187754,ENSG00000241476,ENSG00000268447,ENSG00000269791	no		Premeiotic grp 1	Preleptotene spermatocytes,Spermatogonia	0	0	not set	0	0	0	0	not set	0	0	1	2	nuclear	2	0	0	0	not set	0	0	2	3	nuclear	6	1	0	0	not set	0	0	0	0	not set	0	0	3	3	nuclear
ENSG00000268447	SSX2B	Q16385	PE1	ChrX	HPA045683	yes	ENSG00000126752,ENSG00000165583,ENSG00000165584,ENSG00000187754,ENSG00000241476,ENSG00000268009,ENSG00000269791	no		Premeiotic grp 1	Preleptotene spermatocytes,Spermatogonia	0	0	not set	0	0	0	0	not set	0	0	1	2	nuclear	2	0	0	0	not set	0	0	2	3	nuclear	6	1	0	0	not set	0	0	0	0	not set	0	0	3	3	nuclear
ENSG00000268651	CTAG1A	P78358	uPE1	ChrX	CAB013061	no		yes	orthogonal	Premeiotic and meiotic grp2	Pachytene spermatocytes,Preleptotene spermatocytes,Spermatogonia	0	0	not set	0	0	0	0	not set	0	0	3	3	cytoplasmic,membrane	9	1	0	0	not set	0	0	3	3	cytoplasmic,membrane	9	1	0	0	not set	0	0	0	0	not set	0	0	3	3	cytoplasmic,membrane
ENSG00000268940	CT45A1	Q5HYN5	PE2	ChrX	HPA044735	yes	ENSG00000228836,ENSG00000269096,ENSG00000269586,ENSG00000270946,ENSG00000271449,ENSG00000273696,ENSG00000278085,ENSG00000278289	no		Premeiotic and meiotic grp2	Pachytene spermatocytes,Preleptotene spermatocytes,Spermatogonia	0	0	not set	0	0	0	0	not set	0	0	3	3	nuclear	9	1	0	0	not set	0	0	2	3	nuclear	6	1	0	0	not set	0	0	0	0	not set	0	0	3	3	nuclear
ENSG00000269058	CALR3	Q96L12	PE1	Chr19	HPA048460	no		yes	independent,orthogonal		Elongated or late spermatids,Pachytene spermatocytes,Preleptotene spermatocytes,Round or early spermatids,Spermatogonia	1	3	cytoplasmic	3	0	3	3	cytoplasmic	9	1	2	3	cytoplasmic	6	1	0	0	not set	0	0	2	3	cytoplasmic	6	1	3	3	cytoplasmic	9	1	1	3	cytoplasmic	3	0	2	3	cytoplasmic
ENSG00000269096	CT45A3	Q8NHU0	PE1	ChrX	HPA044735	yes	ENSG00000228836,ENSG00000268940,ENSG00000269586,ENSG00000270946,ENSG00000271449,ENSG00000273696,ENSG00000278085,ENSG00000278289	no		Premeiotic and meiotic grp2	Pachytene spermatocytes,Preleptotene spermatocytes,Spermatogonia	0	0	not set	0	0	0	0	not set	0	0	3	3	nuclear	9	1	0	0	not set	0	0	2	3	nuclear	6	1	0	0	not set	0	0	0	0	not set	0	0	3	3	nuclear
ENSG00000269586	CT45A10	P0DMU9	PE1	ChrX	HPA044735	yes	ENSG00000228836,ENSG00000268940,ENSG00000269096,ENSG00000270946,ENSG00000271449,ENSG00000273696,ENSG00000278085,ENSG00000278289	no		Premeiotic and meiotic grp2	Pachytene spermatocytes,Preleptotene spermatocytes,Spermatogonia	0	0	not set	0	0	0	0	not set	0	0	3	3	nuclear	9	1	0	0	not set	0	0	2	3	nuclear	6	1	0	0	not set	0	0	0	0	not set	0	0	3	3	nuclear
ENSG00000269791	SSX4B	O60224	PE1	ChrX	HPA045683	yes	ENSG00000126752,ENSG00000165583,ENSG00000165584,ENSG00000187754,ENSG00000241476,ENSG00000268009,ENSG00000268447	no		Premeiotic grp 1	Preleptotene spermatocytes,Spermatogonia	0	0	not set	0	0	0	0	not set	0	0	1	2	nuclear	2	0	0	0	not set	0	0	2	3	nuclear	6	1	0	0	not set	0	0	0	0	not set	0	0	3	3	nuclear
ENSG00000270946	CT45A9	P0DMV2	PE3	ChrX	HPA044735	yes	ENSG00000228836,ENSG00000268940,ENSG00000269096,ENSG00000269586,ENSG00000271449,ENSG00000273696,ENSG00000278085,ENSG00000278289	no		Premeiotic and meiotic grp2	Pachytene spermatocytes,Preleptotene spermatocytes,Spermatogonia	0	0	not set	0	0	0	0	not set	0	0	3	3	nuclear	9	1	0	0	not set	0	0	2	3	nuclear	6	1	0	0	not set	0	0	0	0	not set	0	0	3	3	nuclear
ENSG00000271449	CT45A2	Q5DJT8	PE2	ChrX	HPA044735	yes	ENSG00000228836,ENSG00000268940,ENSG00000269096,ENSG00000269586,ENSG00000270946,ENSG00000273696,ENSG00000278085,ENSG00000278289	no		Premeiotic and meiotic grp2	Pachytene spermatocytes,Preleptotene spermatocytes,Spermatogonia	0	0	not set	0	0	0	0	not set	0	0	3	3	nuclear	9	1	0	0	not set	0	0	2	3	nuclear	6	1	0	0	not set	0	0	0	0	not set	0	0	3	3	nuclear
ENSG00000272196	HIST2H2AA4	Q6FI13	PE1	Chr1	HPA041189	yes	ENSG00000099284,ENSG00000113648,ENSG00000164508,ENSG00000180573,ENSG00000181218,ENSG00000184260,ENSG00000184270,ENSG00000188486,ENSG00000196747,ENSG00000196787,ENSG00000196866,ENSG00000203812,ENSG00000246705,ENSG00000274997,ENSG00000275221,ENSG00000276368,ENSG00000276903,ENSG00000277075,ENSG00000278463,ENSG00000278677,ENSG00000282988	no			Elongated or late spermatids,Pachytene spermatocytes,Preleptotene spermatocytes,Round or early spermatids,Spermatogonia	0	0	not set	0	0	3	3	nuclear	9	1	3	3	nuclear	9	1	0	0	not set	0	0	3	3	nuclear	9	1	3	3	nuclear	9	1	0	0	not set	0	0	3	3	nuclear
ENSG00000273269			PE1	Chr2	HPA052691	yes	ENSG00000239605	no			Sertoli cells,Spermatogonia	0	0	not set	0	0	0	0	not set	0	0	0	0	not set	0	0	0	0	not set	0	0	0	0	not set	0	0	0	0	not set	0	0	2	3	cytoplasmic	6	1	2	3	cytoplasmic
ENSG00000273513	TBC1D3K	A0A087X1G2	PE3	Chr17	HPA047745	yes	ENSG00000129204,ENSG00000260287,ENSG00000274226,ENSG00000274419,ENSG00000274512,ENSG00000274611,ENSG00000274808,ENSG00000274933,ENSG00000275954,ENSG00000278299,ENSG00000278599	no		Postmeiotic grp 5	Elongated or late spermatids,Round or early spermatids	0	0	not set	0	0	3	3	cytoplasmic,membrane	9	1	0	0	not set	0	0	0	0	not set	0	0	0	0	not set	0	0	3	3	cytoplasmic,membrane	9	1	2	1	nuclear	2	0	0	0	not set
ENSG00000273604	EPOP	A6NHQ4	PE1	Chr17	HPA056555	no		yes	orthogonal	Premeiotic grp 1	Preleptotene spermatocytes,Spermatogonia	1	1	nuclear	1	0	0	0	not set	0	0	0	0	not set	0	0	0	0	not set	0	0	2	3	cytoplasmic,membrane	6	1	0	0	not set	0	0	0	0	not set	0	0	3	2	cytoplasmic,membrane
ENSG00000273696	CT45A7	P0DMV0	PE3	ChrX	HPA044735	yes	ENSG00000228836,ENSG00000268940,ENSG00000269096,ENSG00000269586,ENSG00000270946,ENSG00000271449,ENSG00000278085,ENSG00000278289	no		Premeiotic and meiotic grp2	Pachytene spermatocytes,Preleptotene spermatocytes,Spermatogonia	0	0	not set	0	0	0	0	not set	0	0	3	3	nuclear	9	1	0	0	not set	0	0	2	3	nuclear	6	1	0	0	not set	0	0	0	0	not set	0	0	3	3	nuclear
ENSG00000274211	SOCS7	O14512	PE1	Chr17	HPA004475	no		no		Somatic grp 6	Sertoli cells	0	0	not set	0	0	0	0	not set	0	0	0	0	not set	0	0	0	0	not set	0	0	0	0	not set	0	0	0	0	not set	0	0	3	3	membrane,nuclear	9	1	0	0	not set
ENSG00000274226	TBC1D3H	P0C7X1	PE2	Chr17	HPA047745	yes	ENSG00000129204,ENSG00000260287,ENSG00000273513,ENSG00000274419,ENSG00000274512,ENSG00000274611,ENSG00000274808,ENSG00000274933,ENSG00000275954,ENSG00000278299,ENSG00000278599	no		Postmeiotic grp 5	Elongated or late spermatids,Round or early spermatids	0	0	not set	0	0	3	3	cytoplasmic,membrane	9	1	0	0	not set	0	0	0	0	not set	0	0	0	0	not set	0	0	3	3	cytoplasmic,membrane	9	1	2	1	nuclear	2	0	0	0	not set
ENSG00000274274	GAGE13		PE2	ChrX	HPA043232	yes	ENSG00000189064,ENSG00000205777,ENSG00000215269,ENSG00000215274,ENSG00000216649,ENSG00000224659,ENSG00000224902,ENSG00000227488,ENSG00000236362,ENSG00000237671,ENSG00000275113	no		Premeiotic grp 1	Preleptotene spermatocytes,Spermatogonia	0	0	not set	0	0	0	0	not set	0	0	2	1	cytoplasmic,nuclear	2	0	0	0	not set	0	0	3	3	cytoplasmic,nuclear	9	1	0	0	not set	0	0	0	0	not set	0	0	3	3	cytoplasmic,nuclear
ENSG00000274391	TPTE	P56180	PE1	Chr21	HPA049690	yes	ENSG00000132958	yes	orthogonal	Meiotic and Postmeiotic grp 4	Pachytene spermatocytes,Round or early spermatids	1	1	cytoplasmic	1	0	1	1	cytoplasmic,membrane	1	0	3	3	membrane	9	1	0	0	not set	0	0	0	0	not set	0	0	3	3	membrane	9	1	0	0	not set	0	0	0	0	not set
ENSG00000274419	TBC1D3D	A0A087WVF3	PE2	Chr17	HPA047745	yes	ENSG00000129204,ENSG00000260287,ENSG00000273513,ENSG00000274226,ENSG00000274512,ENSG00000274611,ENSG00000274808,ENSG00000274933,ENSG00000275954,ENSG00000278299,ENSG00000278599	no		Postmeiotic grp 5	Elongated or late spermatids,Round or early spermatids	0	0	not set	0	0	3	3	cytoplasmic,membrane	9	1	0	0	not set	0	0	0	0	not set	0	0	0	0	not set	0	0	3	3	cytoplasmic,membrane	9	1	2	1	nuclear	2	0	0	0	not set
ENSG00000274600	RIMBP3B	A6NNM3	PE2	Chr22	HPA001183	yes	ENSG00000183246,ENSG00000275793	no		Meiotic and Postmeiotic grp 4	Elongated or late spermatids,Pachytene spermatocytes,Round or early spermatids	1	3	cytoplasmic,nuclear	3	0	3	3	cytoplasmic	9	1	3	3	cytoplasmic	9	1	0	0	not set	0	0	1	3	cytoplasmic	3	0	3	3	cytoplasmic	9	1	0	0	not set	0	0	1	3	cytoplasmic
ENSG00000274611	TBC1D3	Q8IZP1	PE1	Chr17	HPA047745	yes	ENSG00000129204,ENSG00000260287,ENSG00000273513,ENSG00000274226,ENSG00000274419,ENSG00000274512,ENSG00000274808,ENSG00000274933,ENSG00000275954,ENSG00000278299,ENSG00000278599	no		Postmeiotic grp 5	Elongated or late spermatids,Round or early spermatids	0	0	not set	0	0	3	3	cytoplasmic,membrane	9	1	0	0	not set	0	0	0	0	not set	0	0	0	0	not set	0	0	3	3	cytoplasmic,membrane	9	1	2	1	nuclear	2	0	0	0	not set
ENSG00000274808	TBC1D3B	A6NDS4	PE2	Chr17	HPA047745	yes	ENSG00000129204,ENSG00000260287,ENSG00000273513,ENSG00000274226,ENSG00000274419,ENSG00000274512,ENSG00000274611,ENSG00000274933,ENSG00000275954,ENSG00000278299,ENSG00000278599	no		Postmeiotic grp 5	Elongated or late spermatids,Round or early spermatids	0	0	not set	0	0	3	3	cytoplasmic,membrane	9	1	0	0	not set	0	0	0	0	not set	0	0	0	0	not set	0	0	3	3	cytoplasmic,membrane	9	1	2	1	nuclear	2	0	0	0	not set
ENSG00000274933	TBC1D3I	A0A087WXS9	PE3	Chr17	HPA047745	yes	ENSG00000129204,ENSG00000260287,ENSG00000273513,ENSG00000274226,ENSG00000274419,ENSG00000274512,ENSG00000274611,ENSG00000274808,ENSG00000275954,ENSG00000278299,ENSG00000278599	no		Postmeiotic grp 5	Elongated or late spermatids,Round or early spermatids	0	0	not set	0	0	3	3	cytoplasmic,membrane	9	1	0	0	not set	0	0	0	0	not set	0	0	0	0	not set	0	0	3	3	cytoplasmic,membrane	9	1	2	1	nuclear	2	0	0	0	not set
ENSG00000275113	GAGE2E		PE2	ChrX	HPA043232	yes	ENSG00000189064,ENSG00000205777,ENSG00000215269,ENSG00000215274,ENSG00000216649,ENSG00000224659,ENSG00000224902,ENSG00000227488,ENSG00000236362,ENSG00000237671,ENSG00000274274	no		Premeiotic grp 1	Preleptotene spermatocytes,Spermatogonia	0	0	not set	0	0	0	0	not set	0	0	2	1	cytoplasmic,nuclear	2	0	0	0	not set	0	0	3	3	cytoplasmic,nuclear	9	1	0	0	not set	0	0	0	0	not set	0	0	3	3	cytoplasmic,nuclear
ENSG00000275793	RIMBP3	Q9UFD9	PE1	Chr22	HPA001183	yes	ENSG00000183246,ENSG00000274600	no		Meiotic and Postmeiotic grp 4	Elongated or late spermatids,Pachytene spermatocytes,Round or early spermatids	1	3	cytoplasmic,nuclear	3	0	3	3	cytoplasmic	9	1	3	3	cytoplasmic	9	1	0	0	not set	0	0	1	3	cytoplasmic	3	0	3	3	cytoplasmic	9	1	0	0	not set	0	0	1	3	cytoplasmic
ENSG00000276410	HIST1H2BB	P33778	PE1	Chr6	HPA042205	yes	ENSG00000124635,ENSG00000146047,ENSG00000158373,ENSG00000180596,ENSG00000184678,ENSG00000185130,ENSG00000196890,ENSG00000197903,ENSG00000203814,ENSG00000233822,ENSG00000234289,ENSG00000273703,ENSG00000273802,ENSG00000274290,ENSG00000274559,ENSG00000274641,ENSG00000275713,ENSG00000277224,ENSG00000278588	no			Leydig cells,Pachytene spermatocytes,Peritubular cells,Preleptotene spermatocytes,Sertoli cells,Spermatogonia	3	3	nuclear	9	1	1	1	nuclear	1	0	2	3	nuclear	6	1	3	3	nuclear	9	1	3	3	nuclear	9	1	1	3	nuclear	3	0	2	3	nuclear	6	1	3	3	nuclear
ENSG00000278085	CT45A8	P0DMV1	PE3	ChrX	HPA044735	yes	ENSG00000228836,ENSG00000268940,ENSG00000269096,ENSG00000269586,ENSG00000270946,ENSG00000271449,ENSG00000273696,ENSG00000278289	no		Premeiotic and meiotic grp2	Pachytene spermatocytes,Preleptotene spermatocytes,Spermatogonia	0	0	not set	0	0	0	0	not set	0	0	3	3	nuclear	9	1	0	0	not set	0	0	2	3	nuclear	6	1	0	0	not set	0	0	0	0	not set	0	0	3	3	nuclear
ENSG00000278195	SSTR3	P32745	PE1	Chr22	CAB022647	no		no		Meiotic and Postmeiotic grp 4	Pachytene spermatocytes,Round or early spermatids	0	0	not set	0	0	1	0.5	cytoplasmic,membrane	0.5	0	3	2	cytoplasmic,membrane	6	1	3	1	cytoplasmic,membrane,nuclear	3	0	1	1	cytoplasmic,membrane	1	0	3	3	cytoplasmic,membrane	9	1	0	0	not set	0	0	1	2	cytoplasmic,membrane
ENSG00000278299	TBC1D3C	Q6IPX1	PE2	Chr17	HPA047745	yes	ENSG00000129204,ENSG00000260287,ENSG00000273513,ENSG00000274226,ENSG00000274419,ENSG00000274512,ENSG00000274611,ENSG00000274808,ENSG00000274933,ENSG00000275954,ENSG00000278599	no		Postmeiotic grp 5	Elongated or late spermatids,Round or early spermatids	0	0	not set	0	0	3	3	cytoplasmic,membrane	9	1	0	0	not set	0	0	0	0	not set	0	0	0	0	not set	0	0	3	3	cytoplasmic,membrane	9	1	2	1	nuclear	2	0	0	0	not set
ENSG00000278599	TBC1D3E	A0A087X179	PE2	Chr17	HPA047745	yes	ENSG00000129204,ENSG00000260287,ENSG00000273513,ENSG00000274226,ENSG00000274419,ENSG00000274512,ENSG00000274611,ENSG00000274808,ENSG00000274933,ENSG00000275954,ENSG00000278299	no		Postmeiotic grp 5	Elongated or late spermatids,Round or early spermatids	0	0	not set	0	0	3	3	cytoplasmic,membrane	9	1	0	0	not set	0	0	0	0	not set	0	0	0	0	not set	0	0	3	3	cytoplasmic,membrane	9	1	2	1	nuclear	2	0	0	0	not set
ENSG00000283706	PRSS50	Q9UI38	PE1	Chr3	HPA040768	yes	ENSG00000206549	no		Meiotic and Postmeiotic grp 4	Elongated or late spermatids,Pachytene spermatocytes,Round or early spermatids	0	0	not set	0	0	2	3	cytoplasmic	6	1	3	3	cytoplasmic	9	1	0	0	not set	0	0	0	0	not set	0	0	2	3	cytoplasmic	6	1	0	0	not set	0	0	0	0	not set
[truncated: 7 more columns]
